# Supplementary material for: An approach to finding specific forms of dysbiosis that associate with different disorders
Source: bioRxiv or medRxiv preprint supplement (doi:10.1101/2024.04.23.24306162), 2024-04-24

# ANHAC v ME/CFS genus

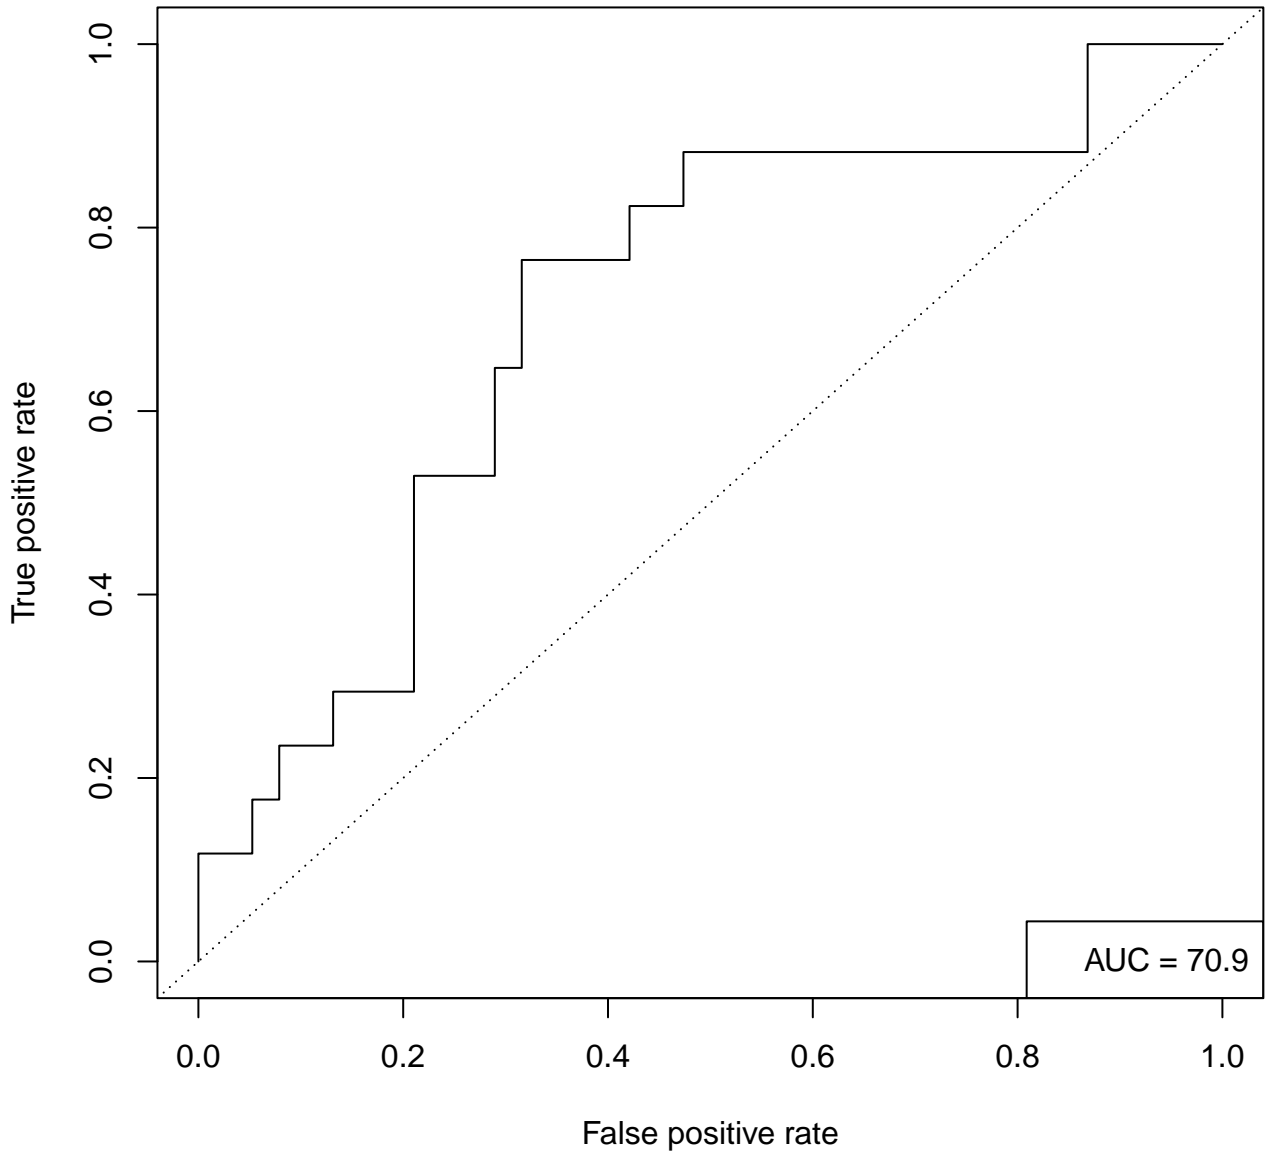

# ME/CFS vs ANHAC

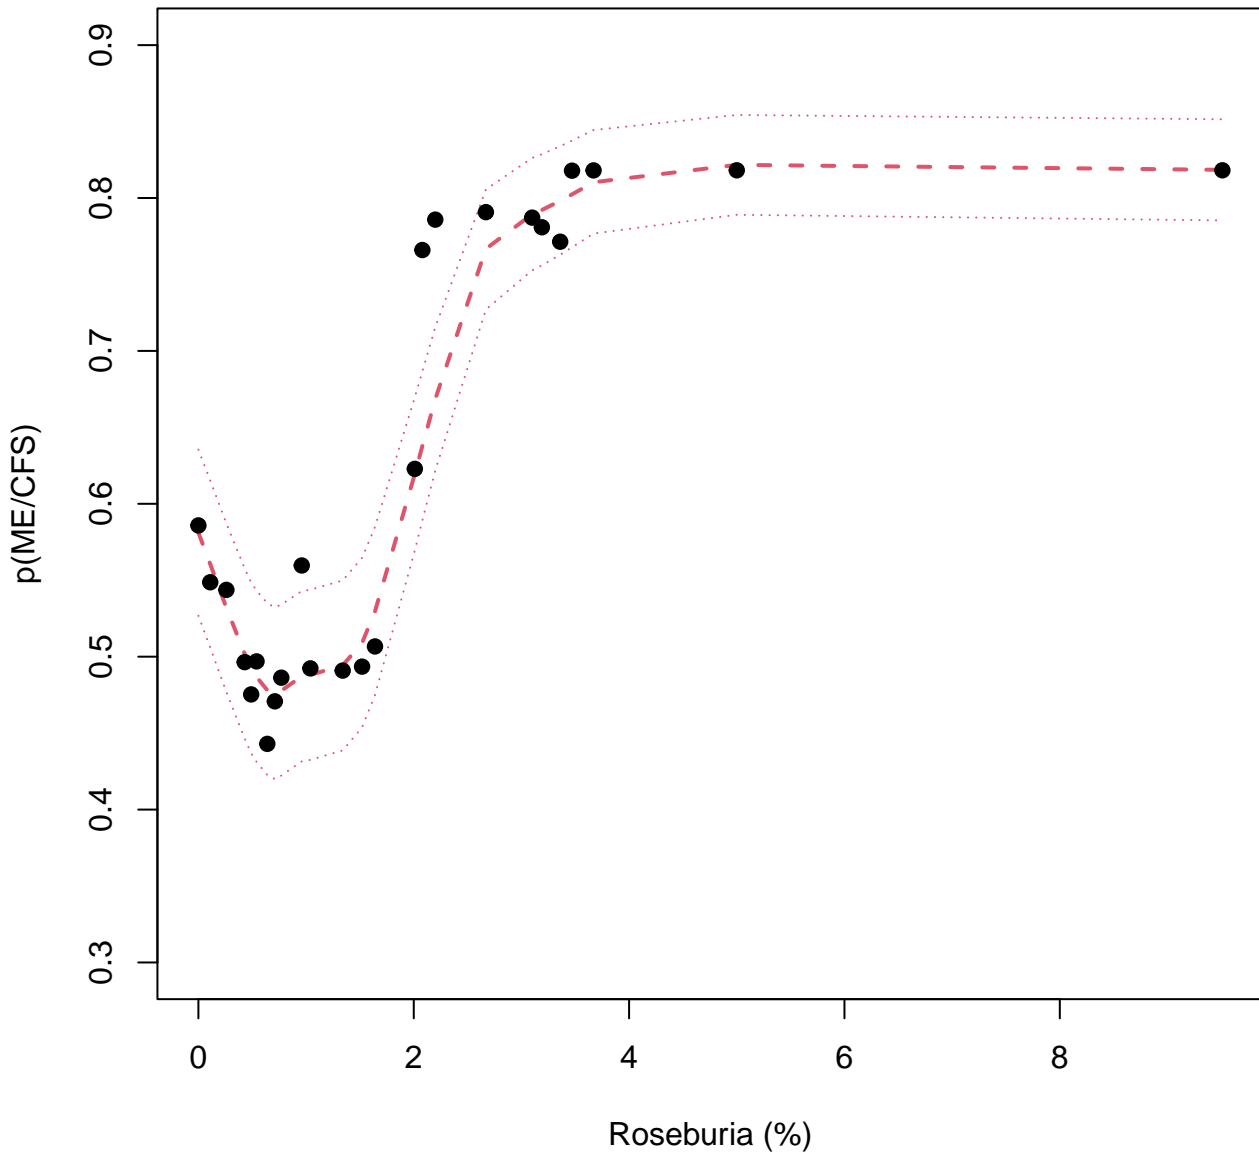

# ME/CFS vs ANHAC

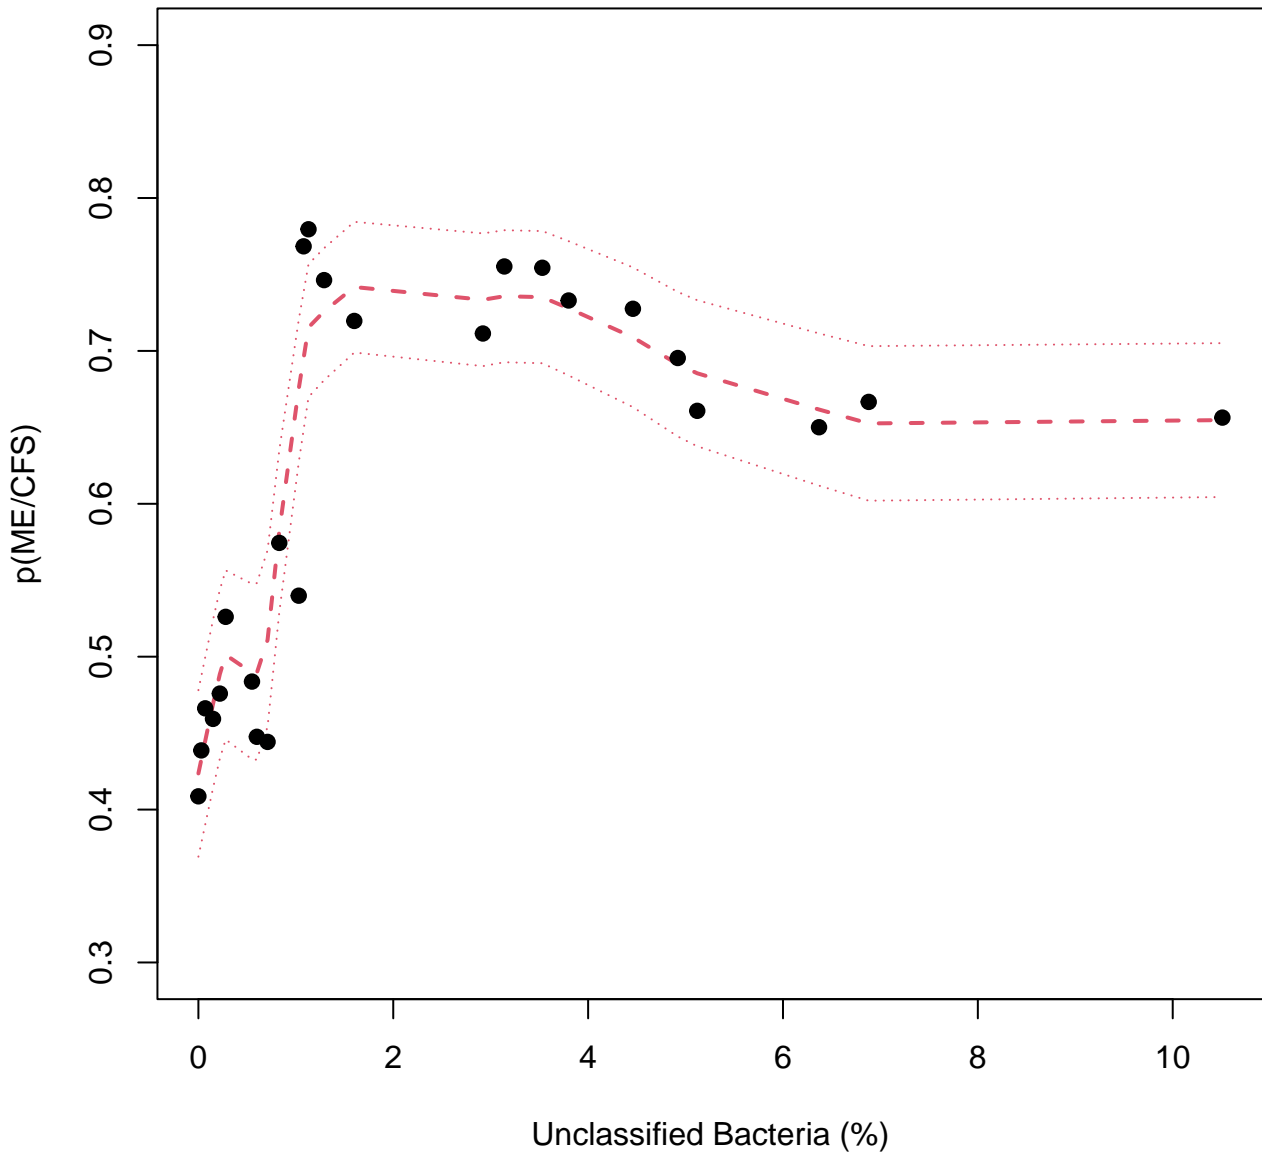

# ME/CFS vs ANHAC

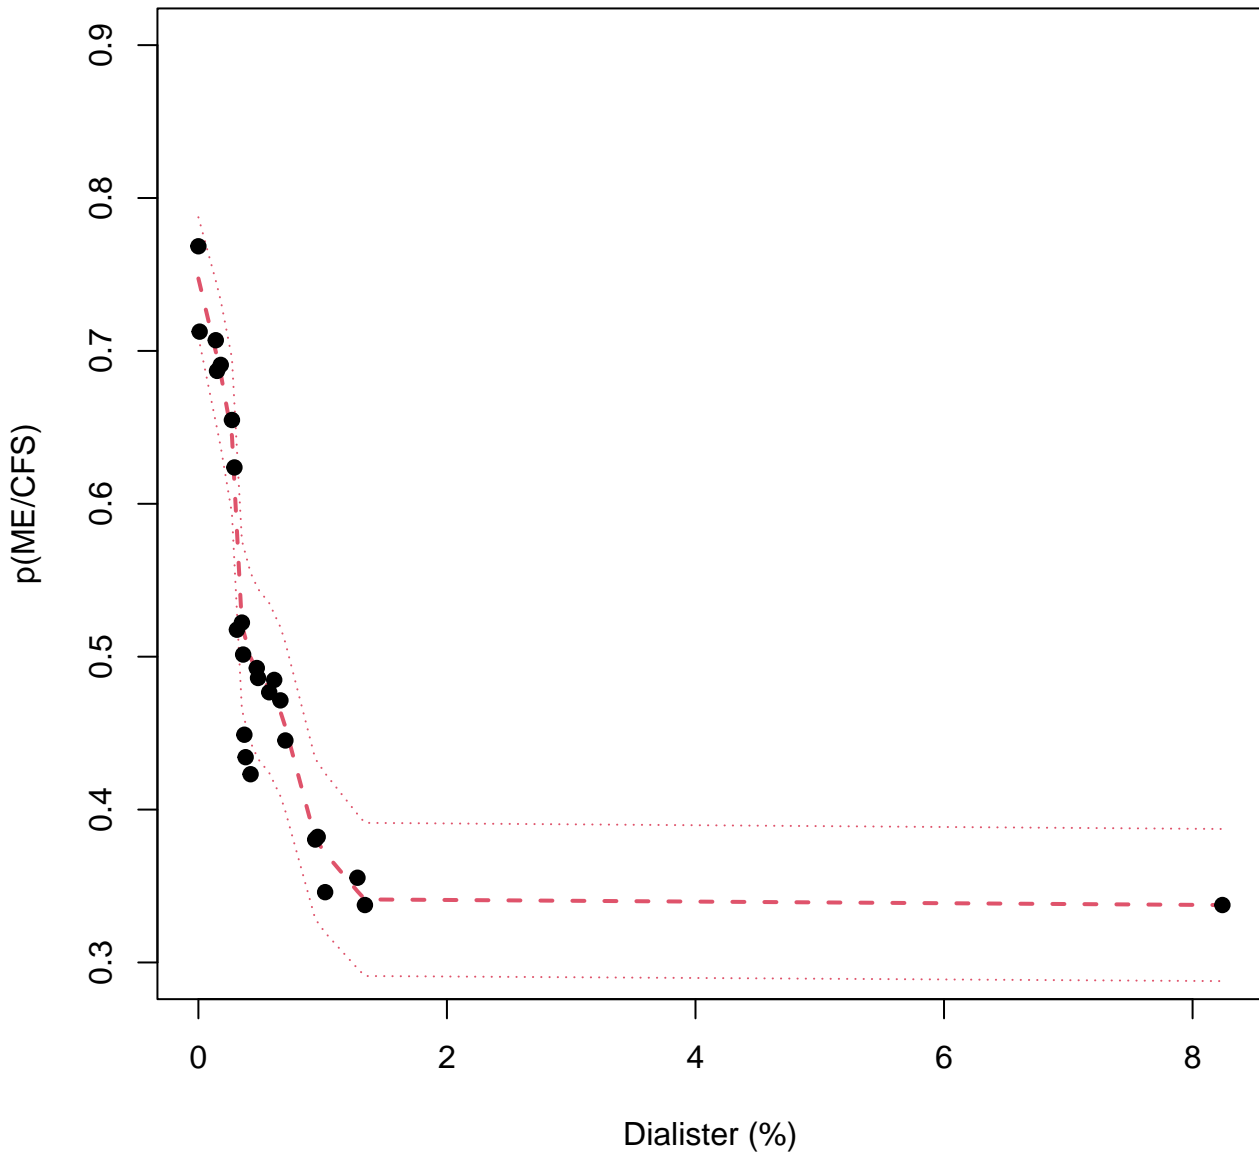

# ANHAC v IBS genus

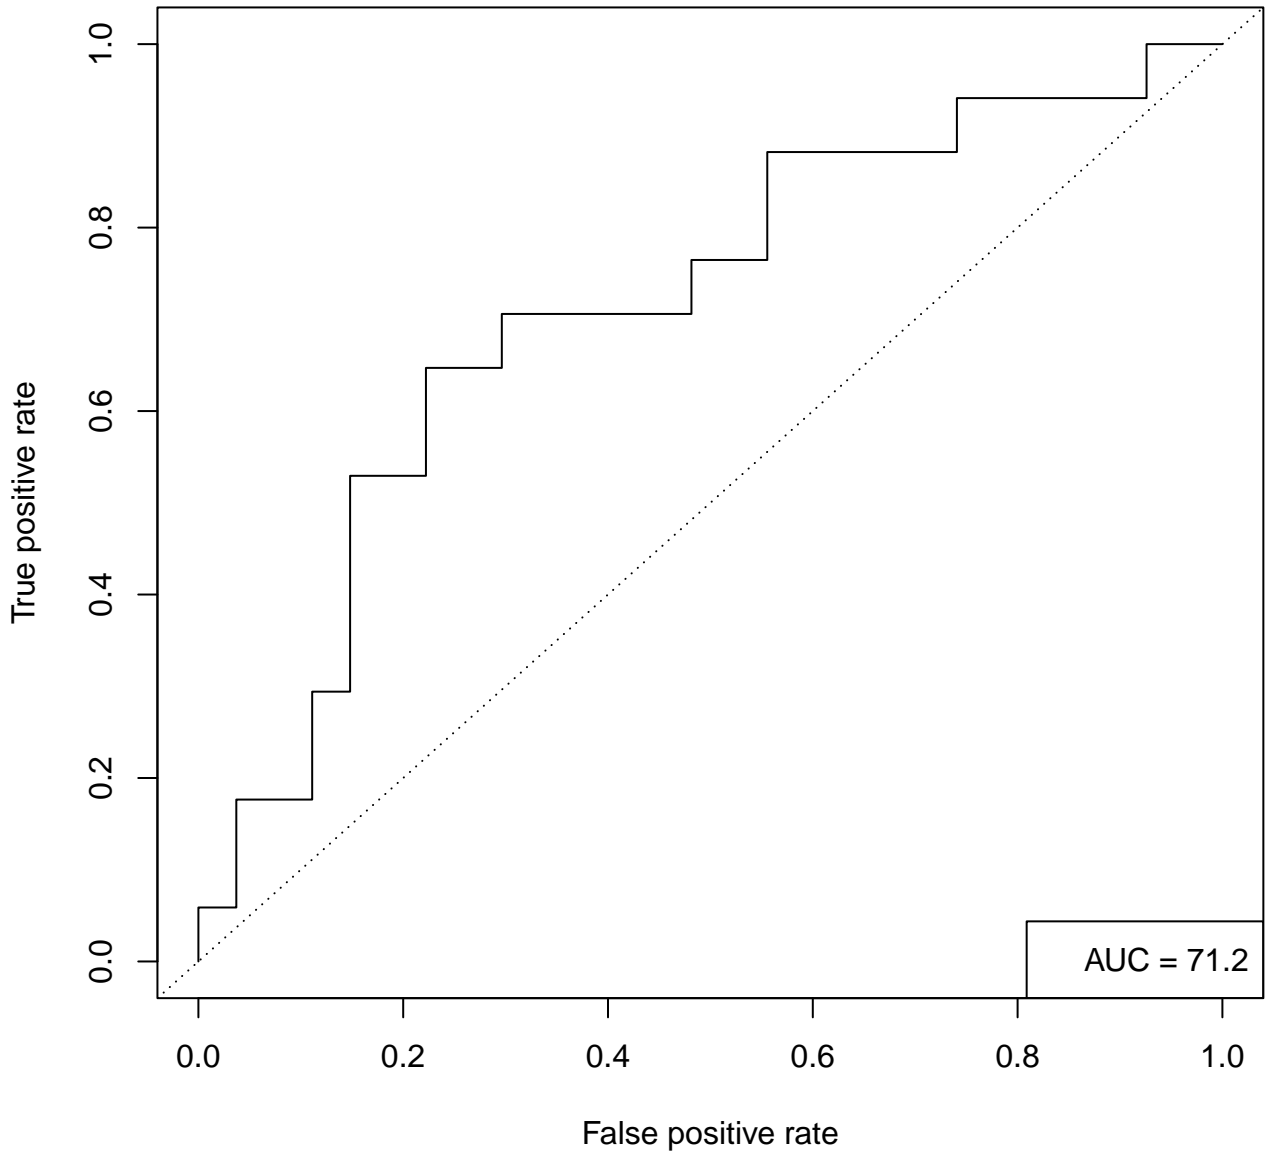

# IBS vs ANHAC

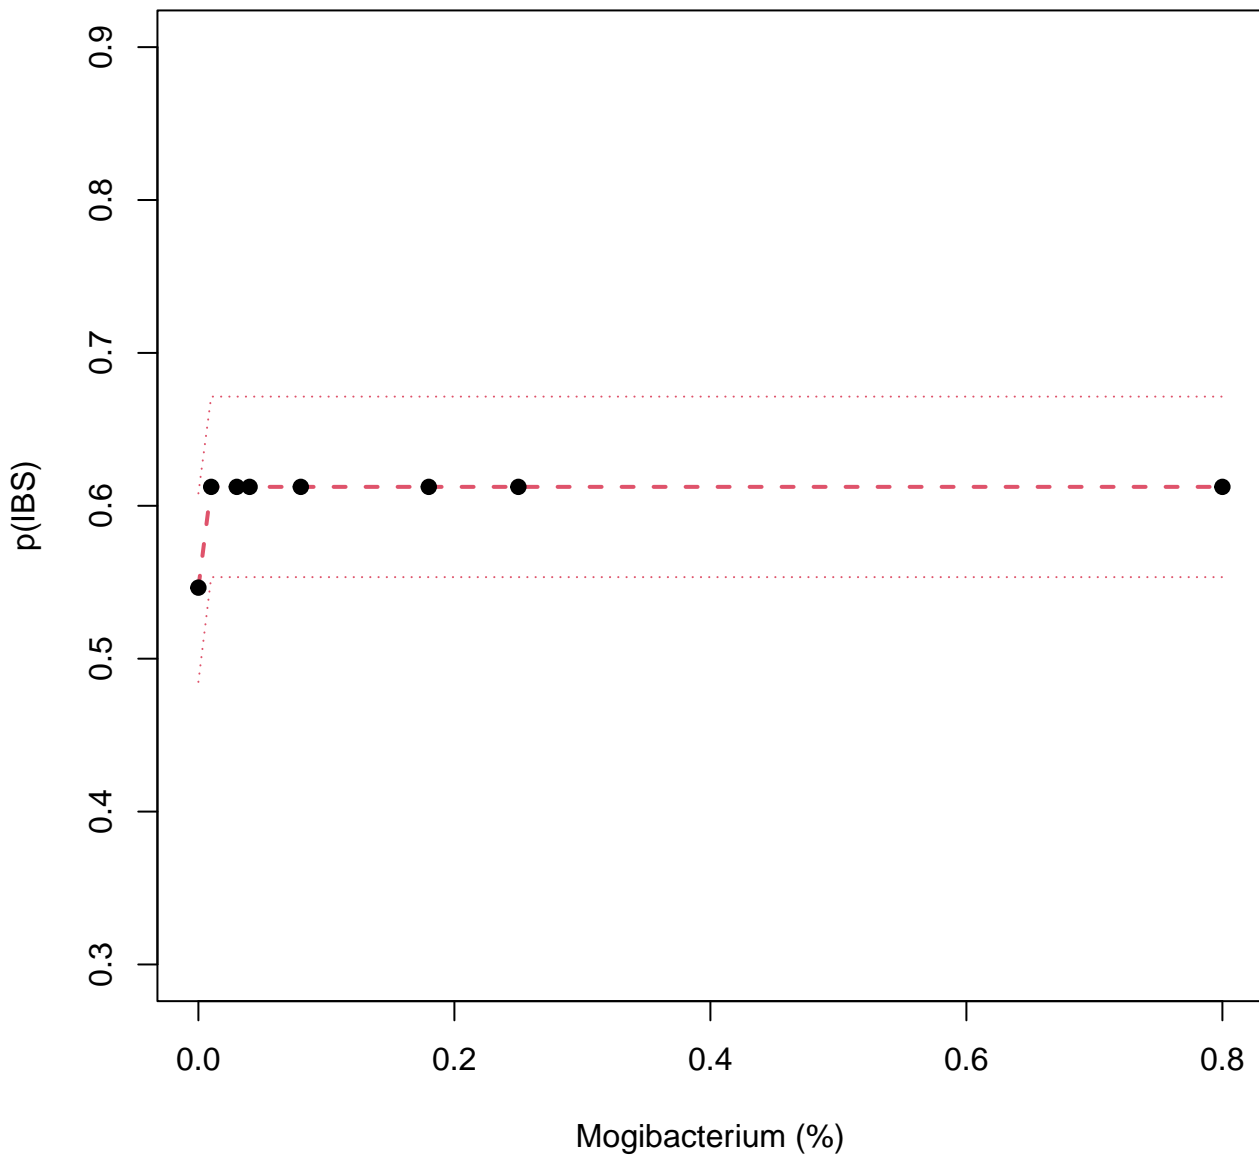



# IBS vs ANHAC

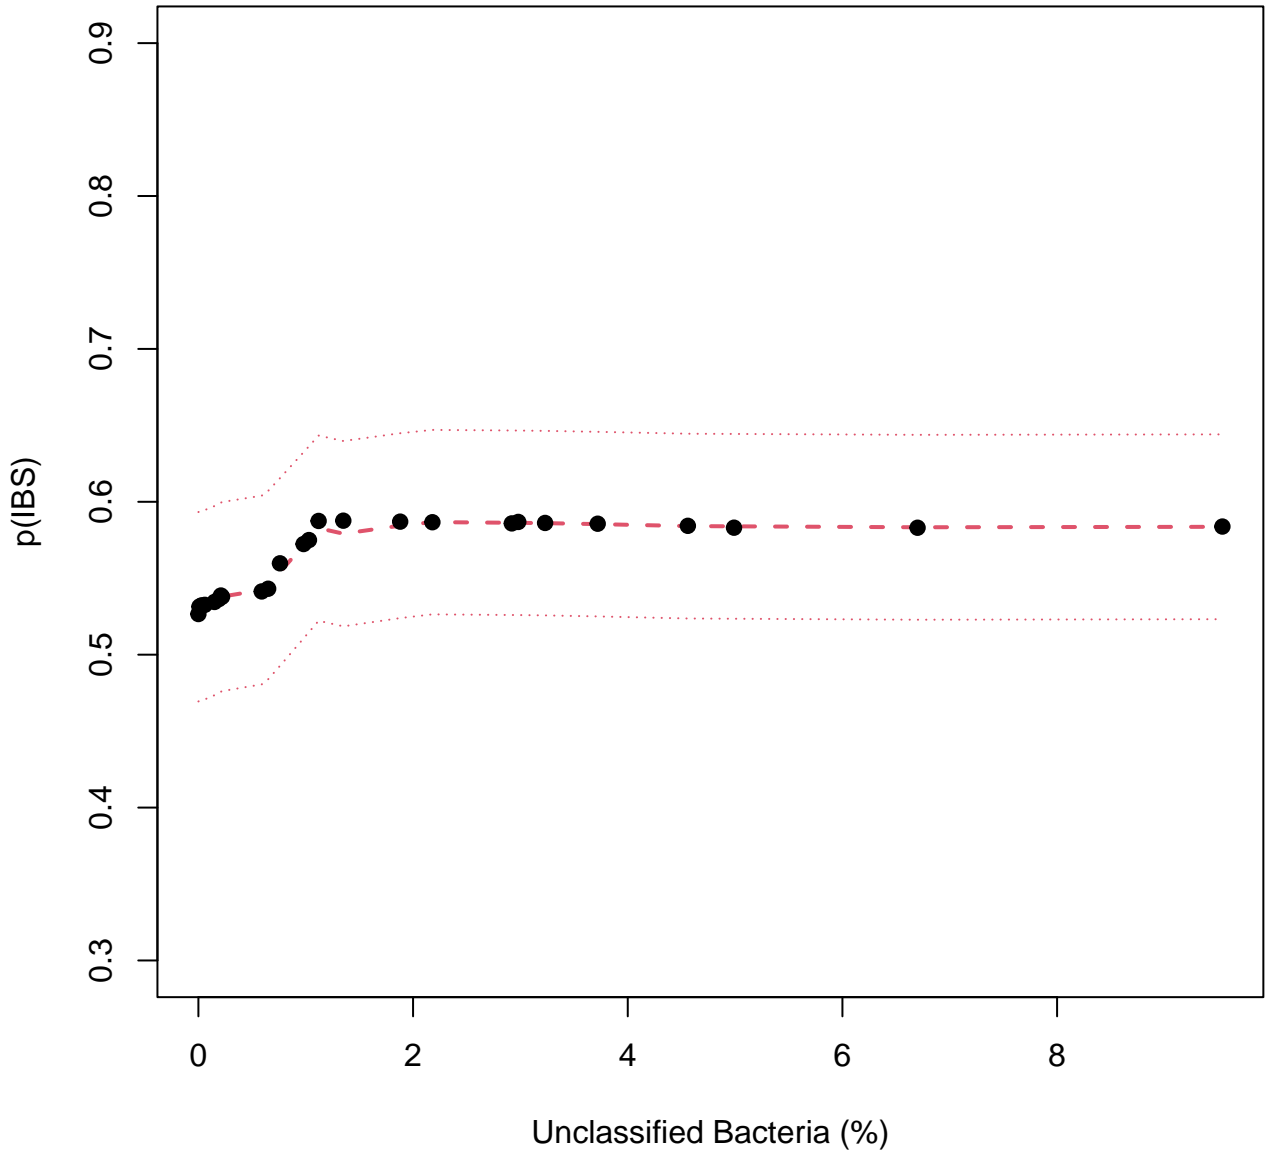



# IBS vs ANHAC

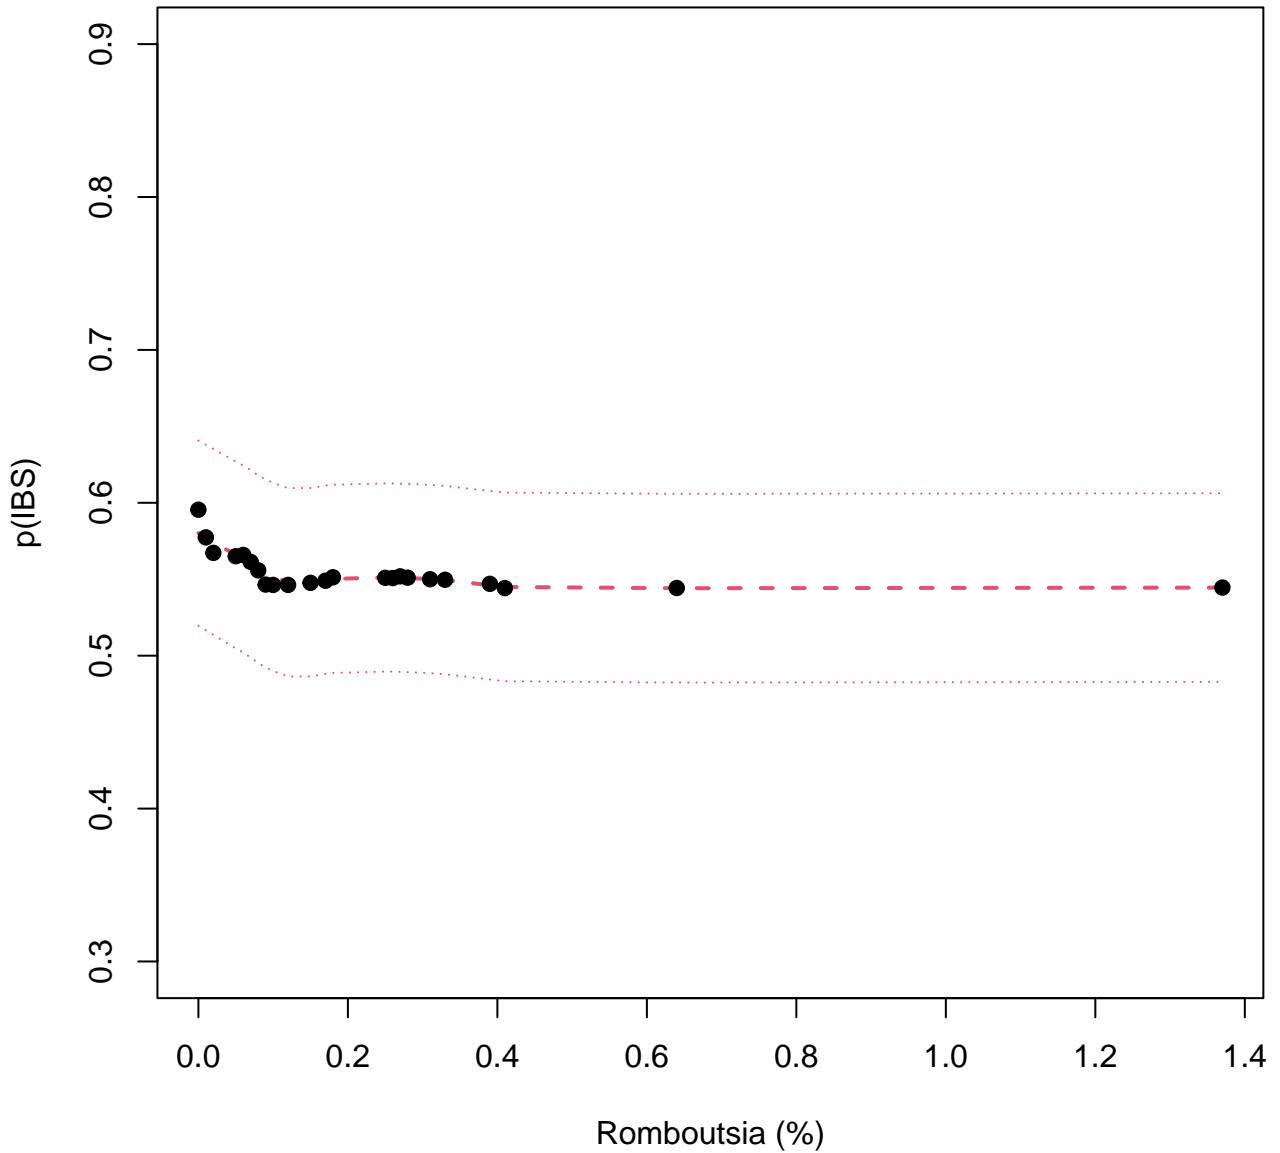

# IBS vs ANHAC

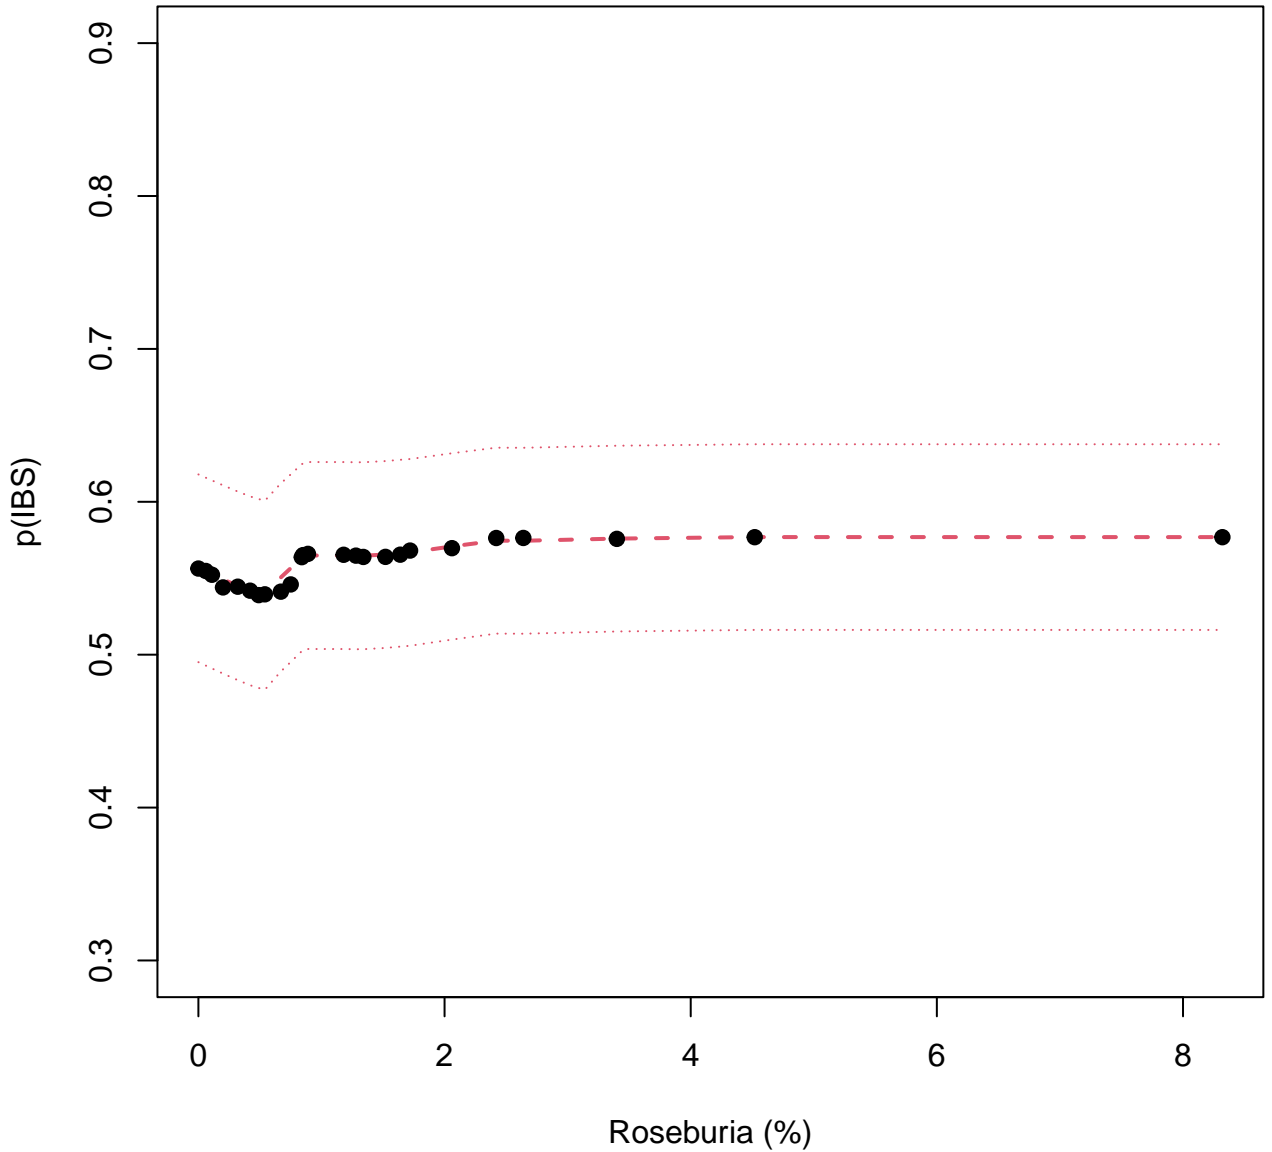

# IBS vs ANHAC

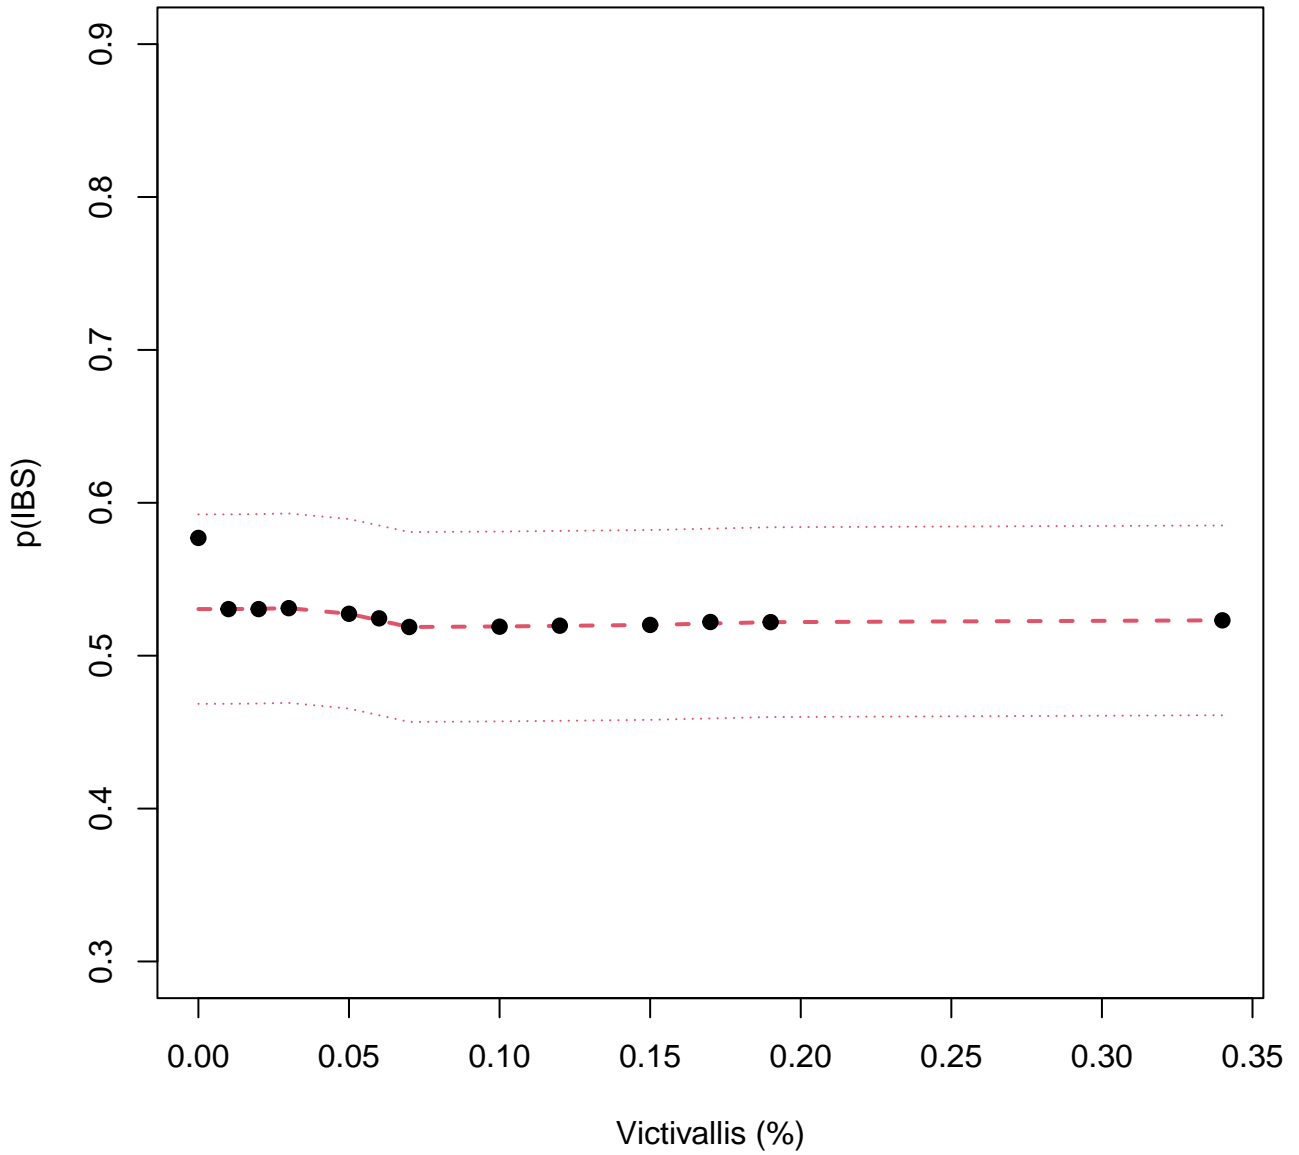

# IBS vs ANHAC

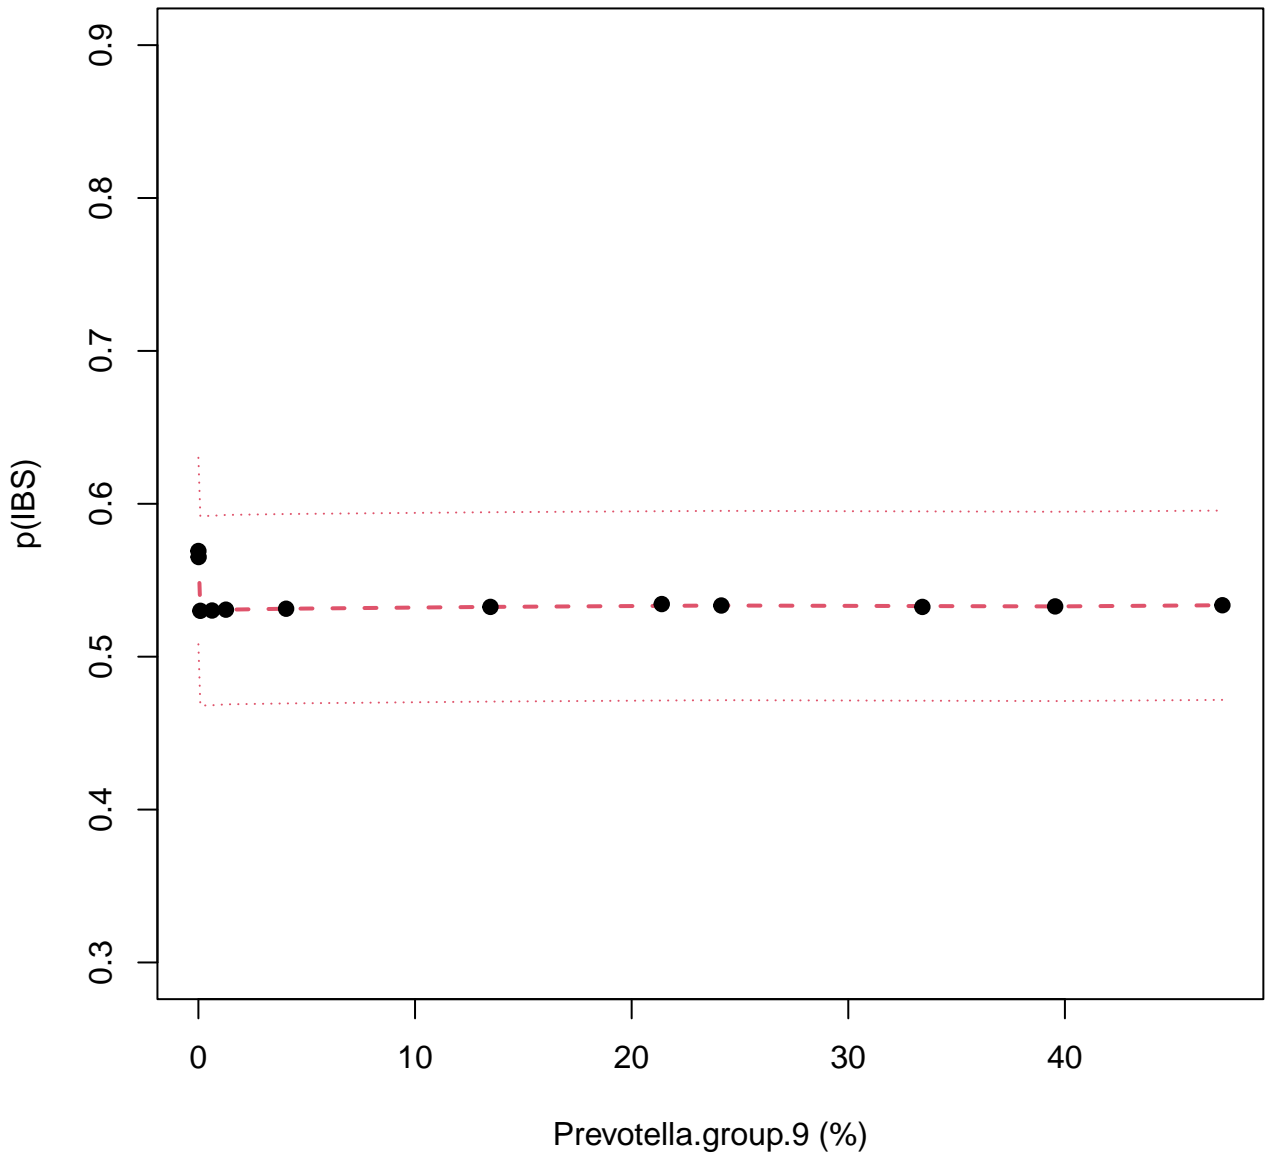

# IBS vs ANHAC

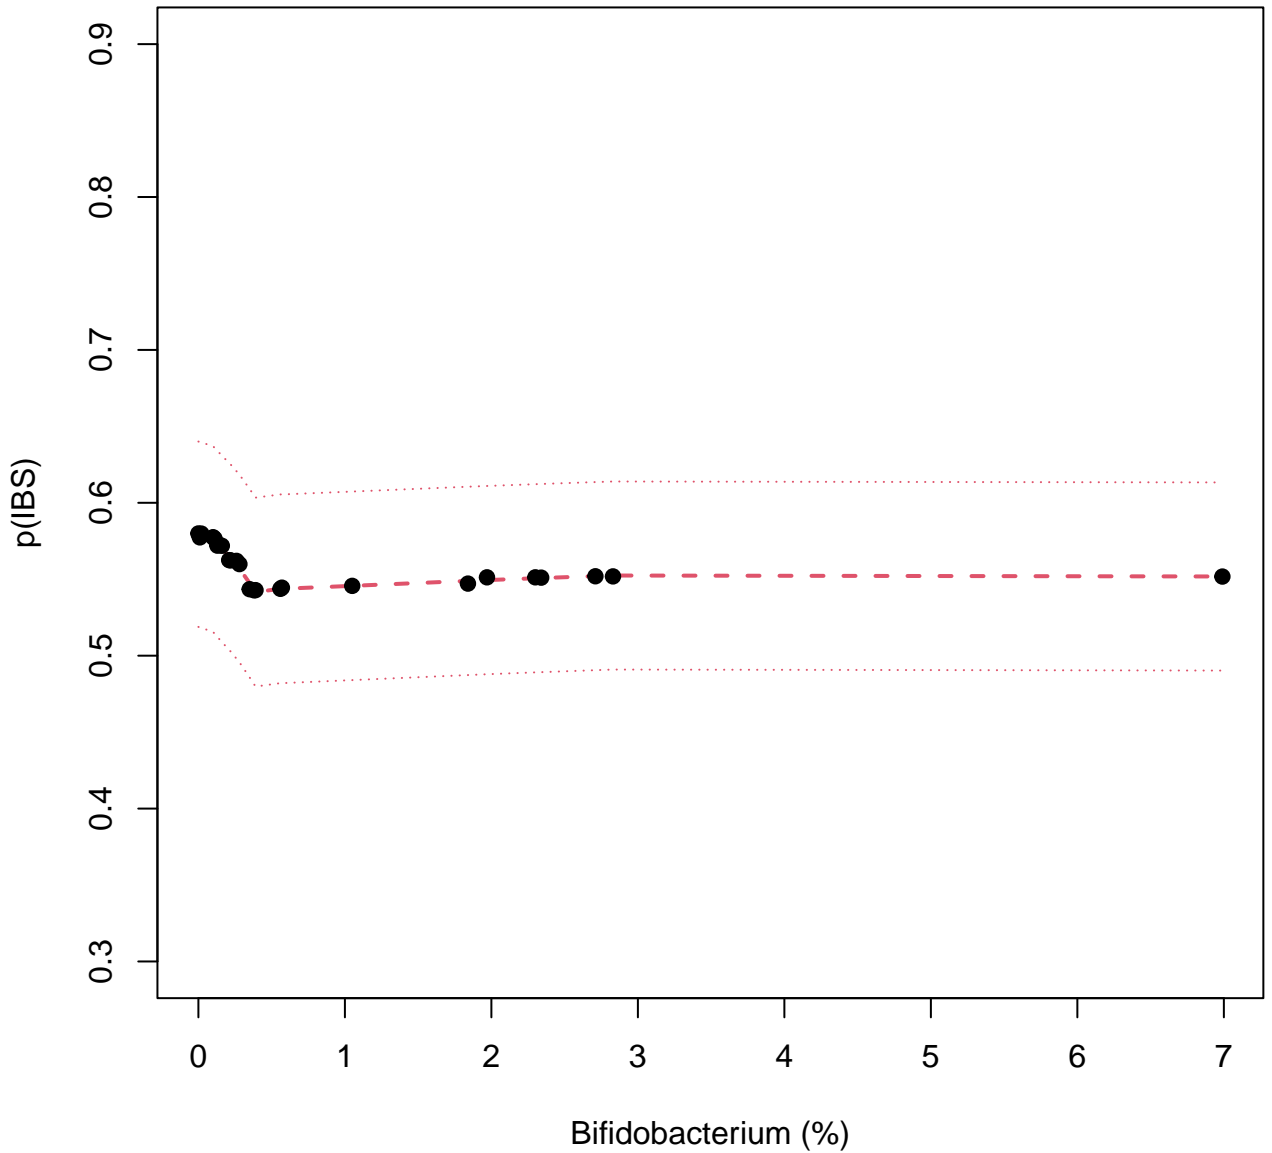

# IBS vs ANHAC

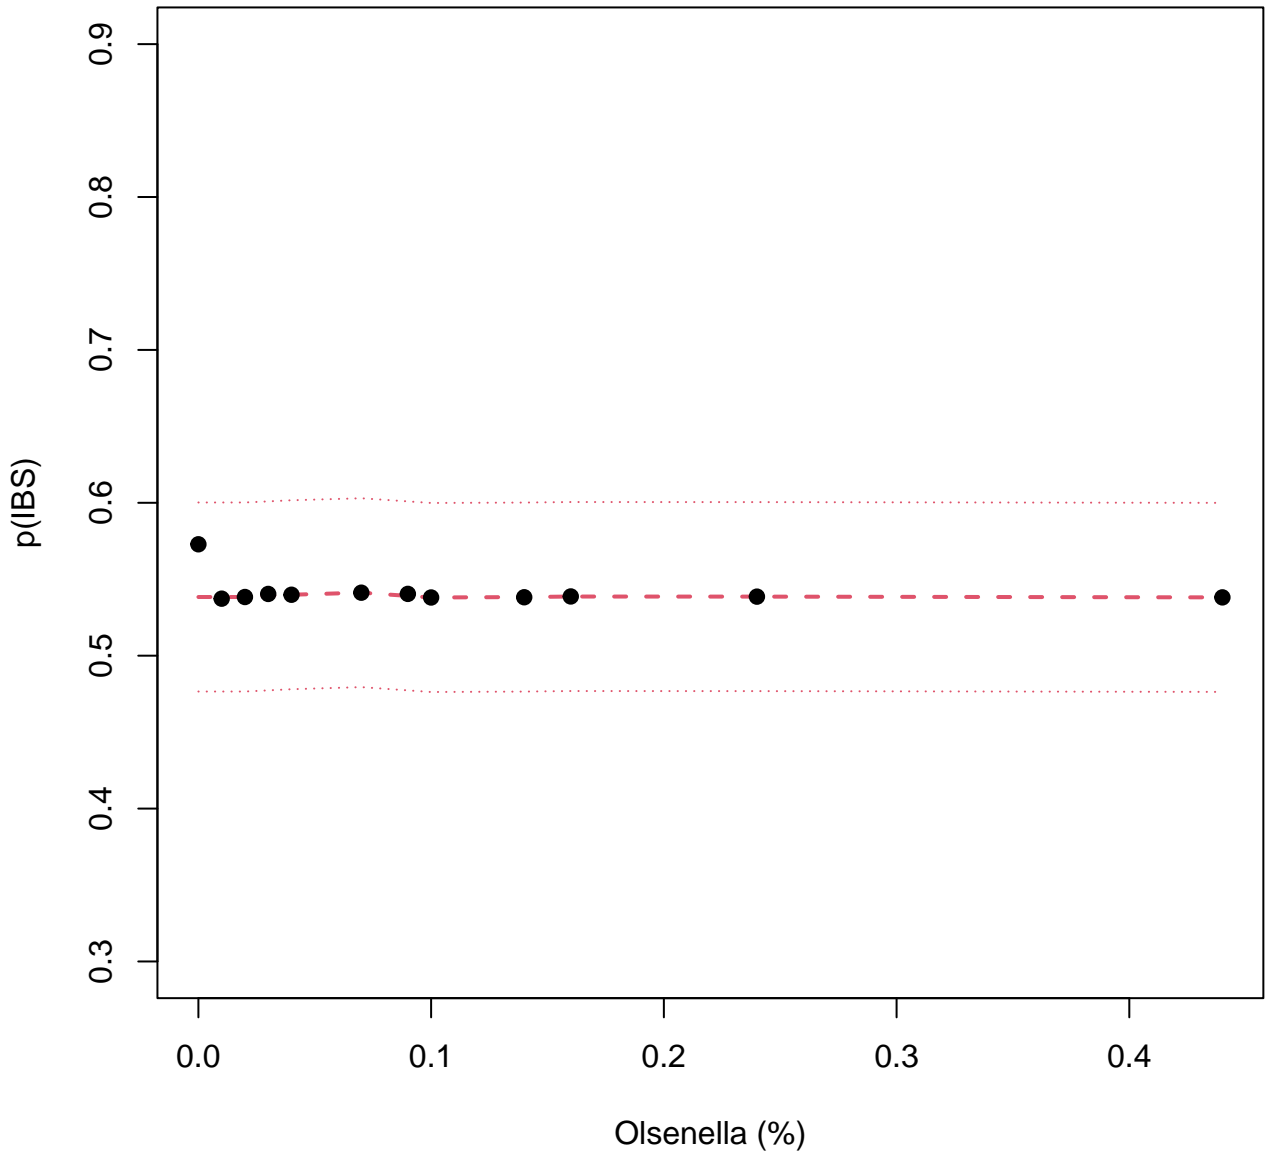

# IBS vs ANHAC

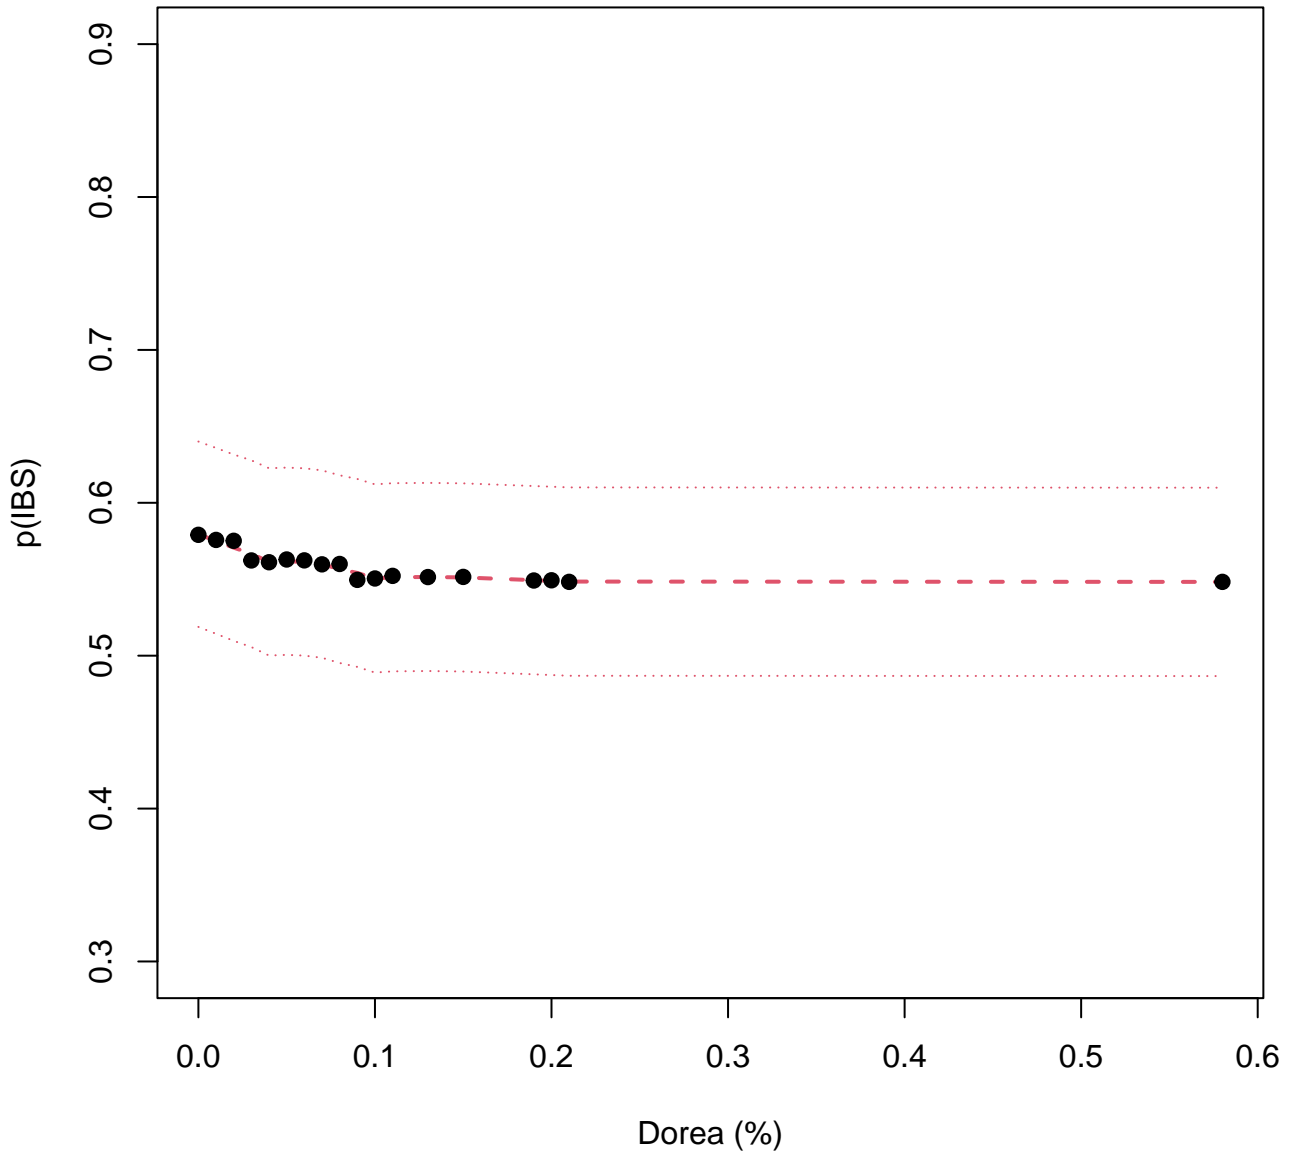

# IBS vs ANHAC

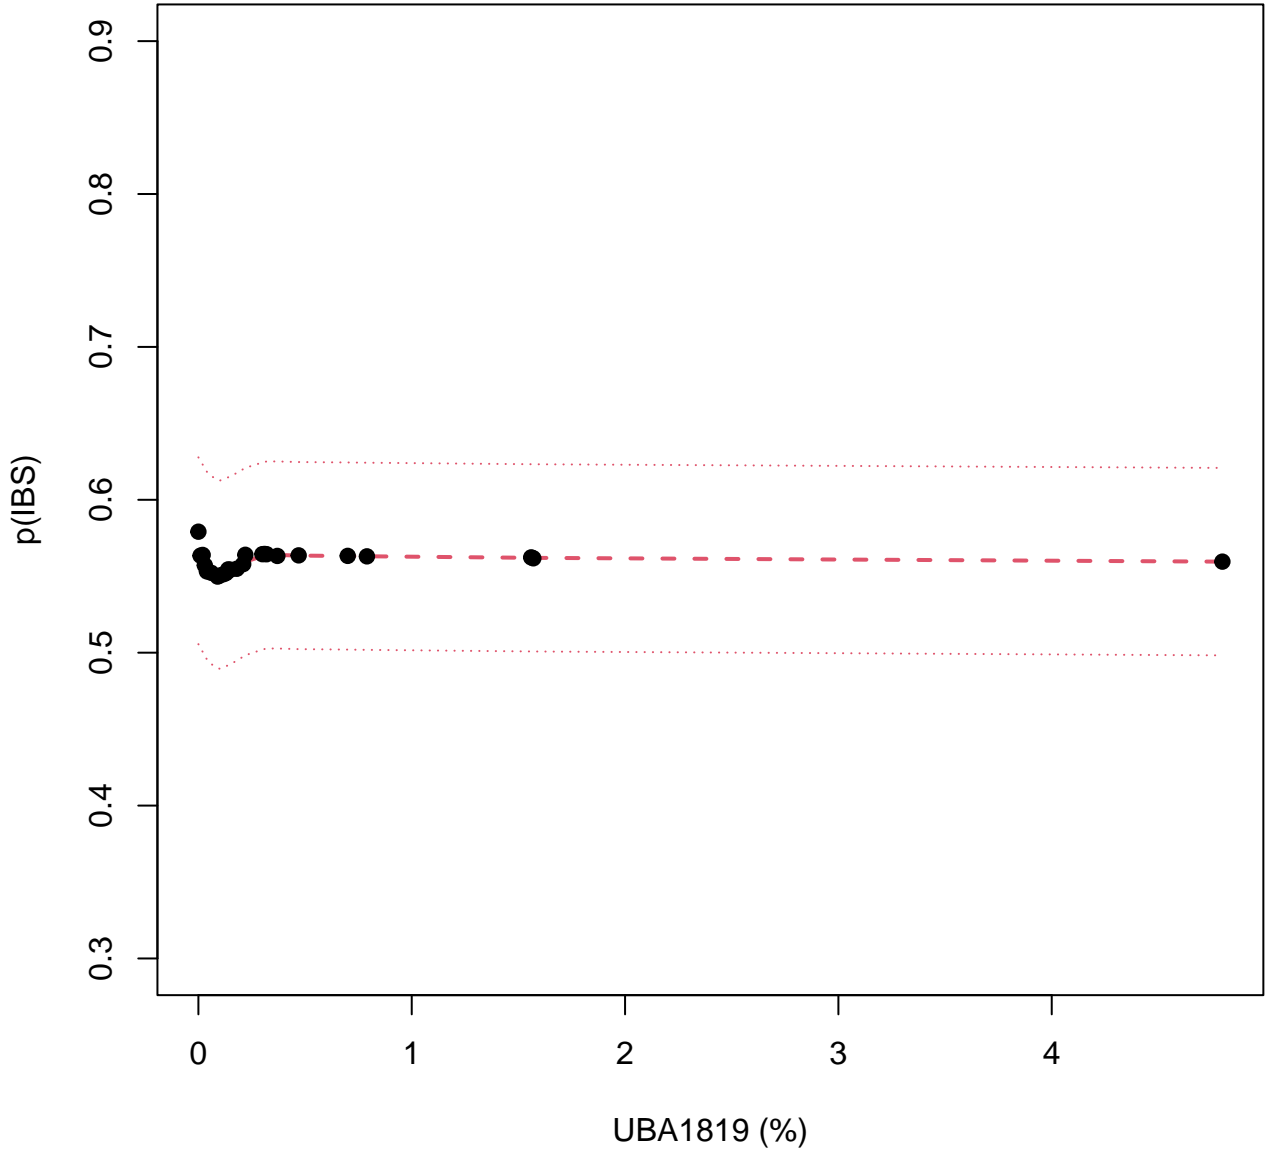



# IBS vs ANHAC

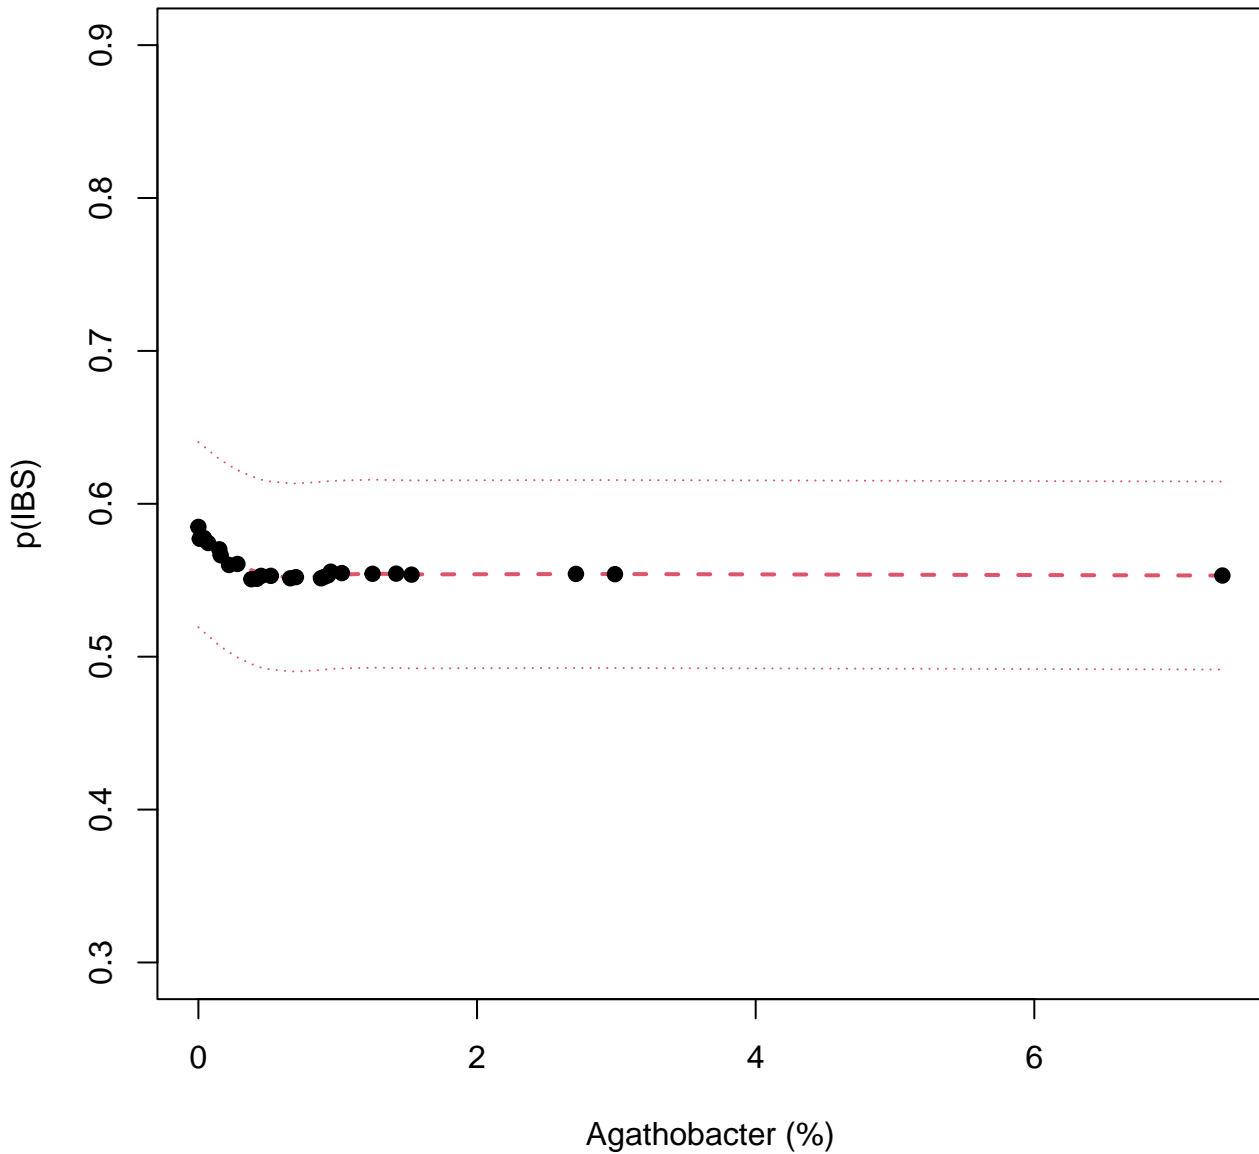

# IBS vs ANHAC

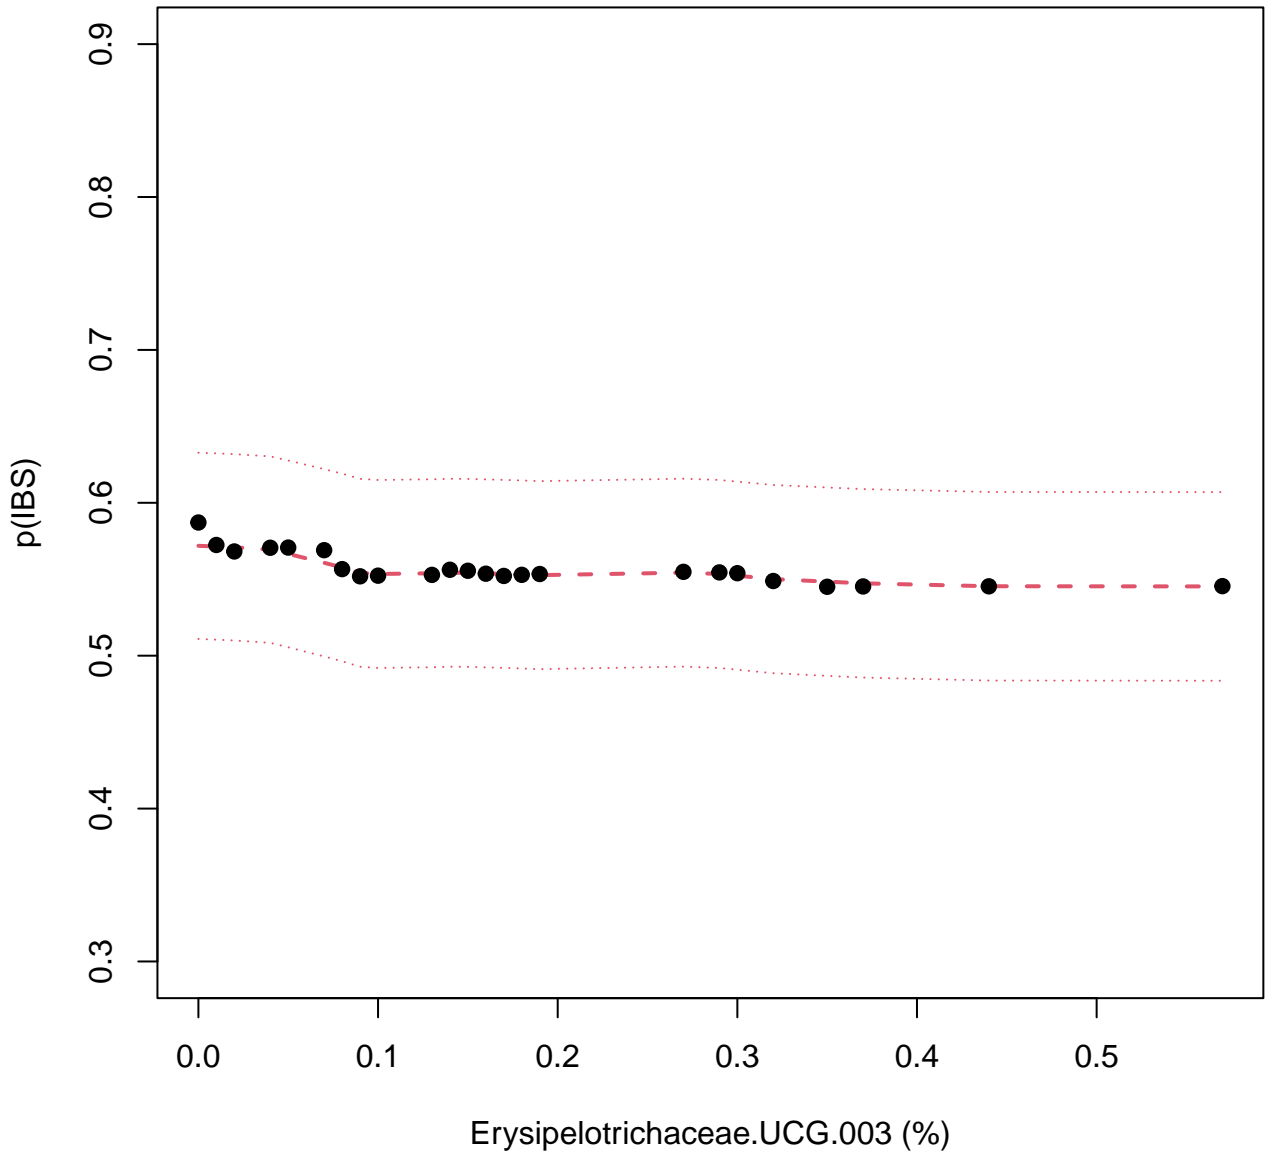

# IBS vs ANHAC

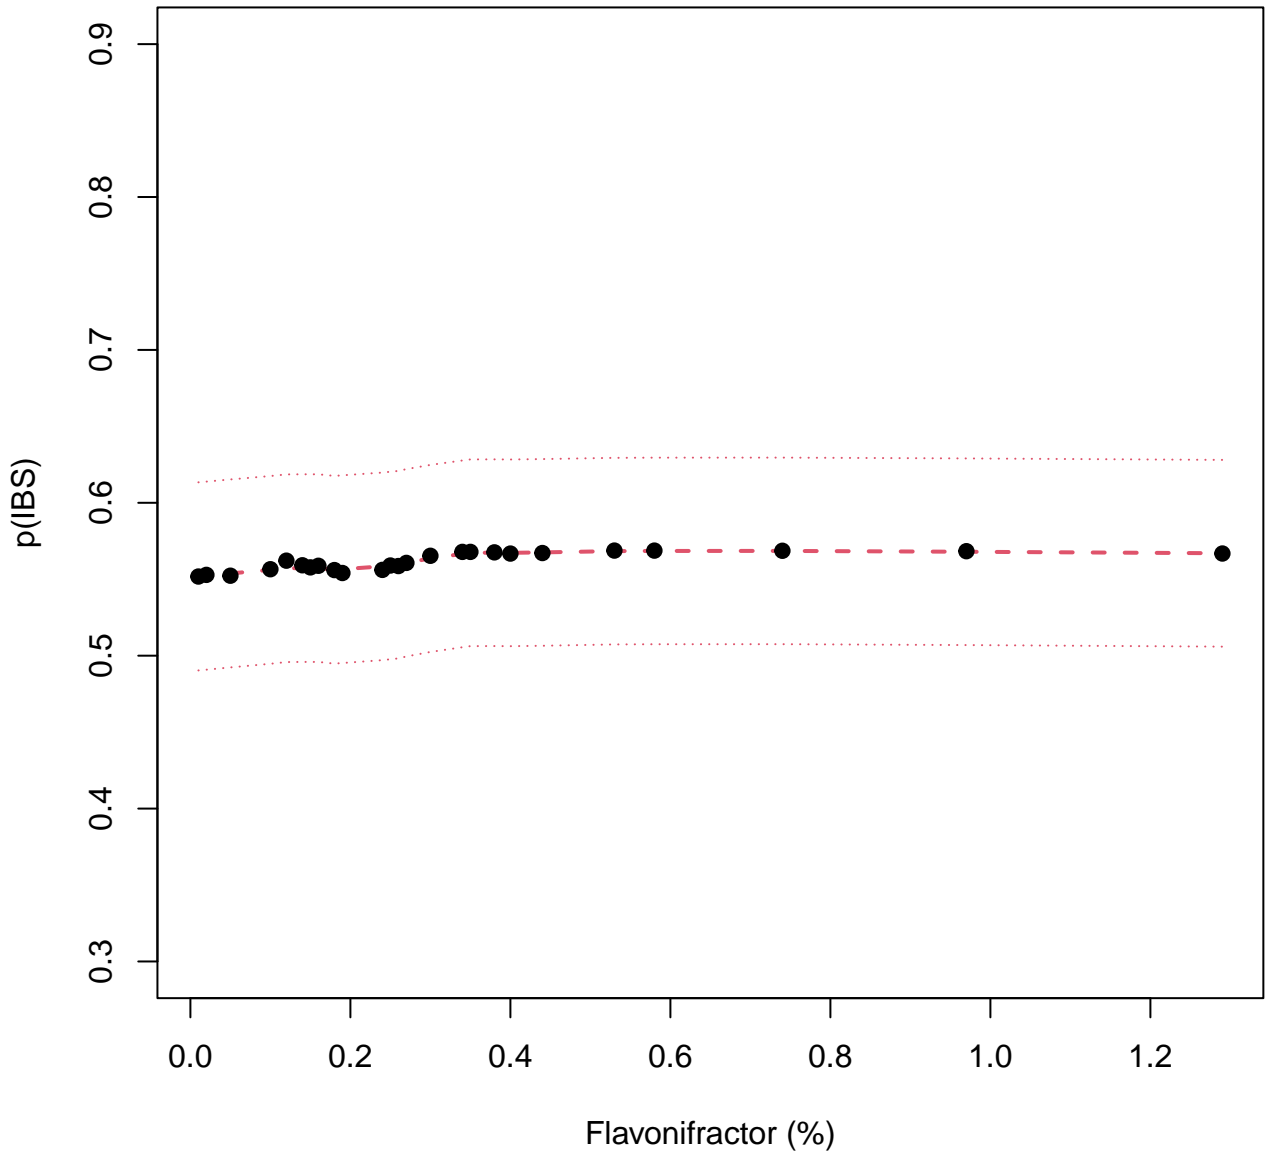

# IBS vs ANHAC

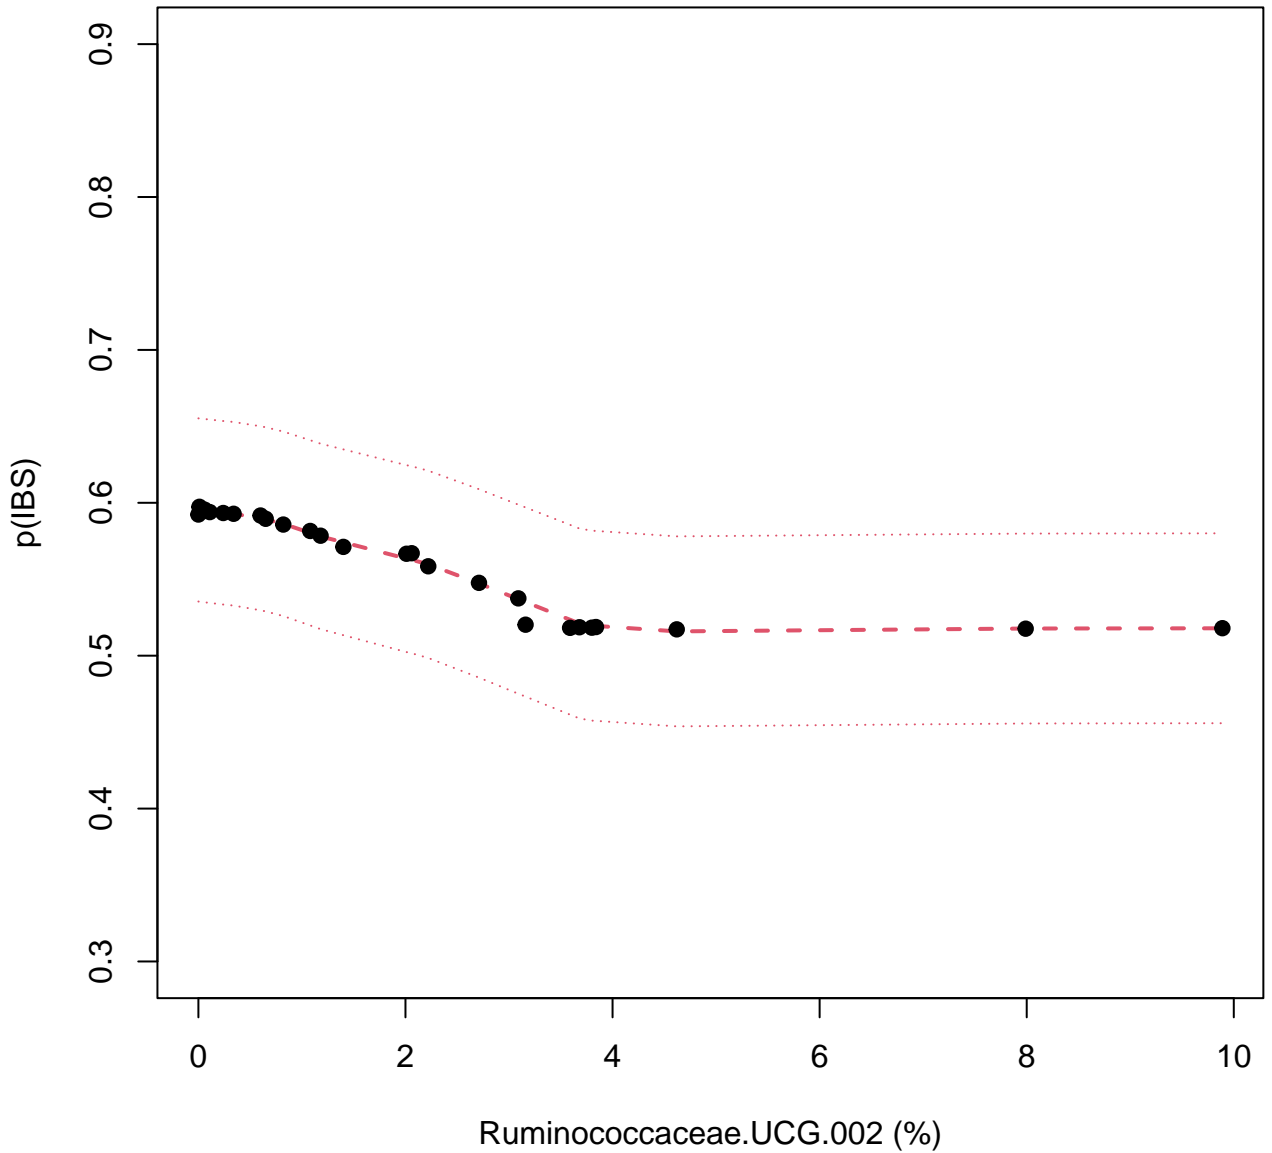

# IBS vs ANHAC

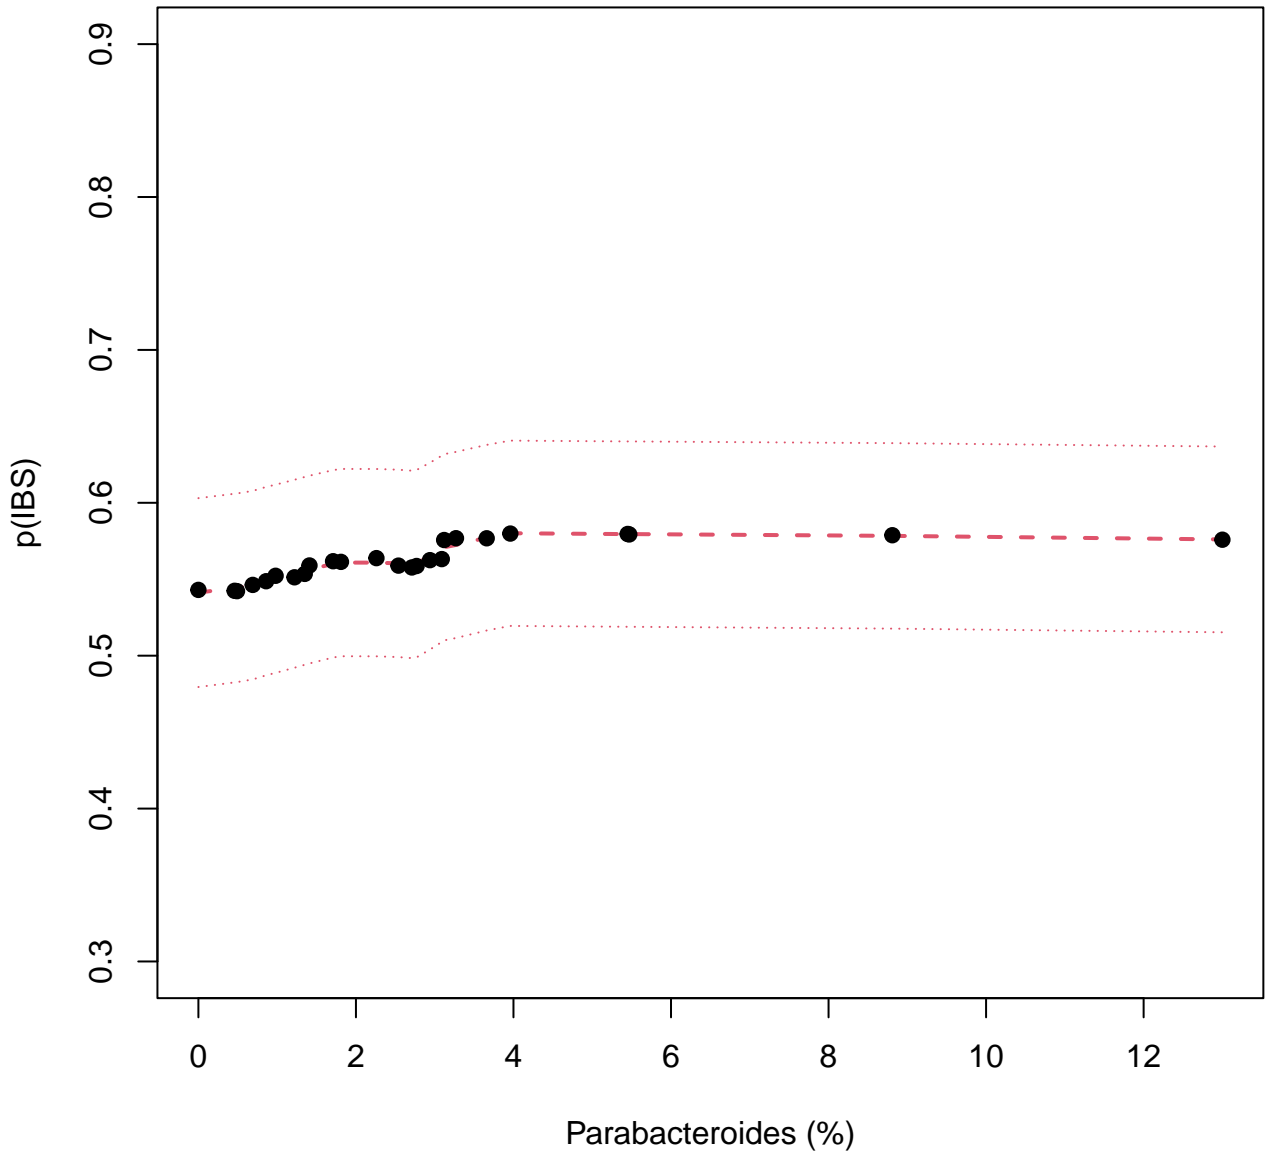

# IBS vs ANHAC

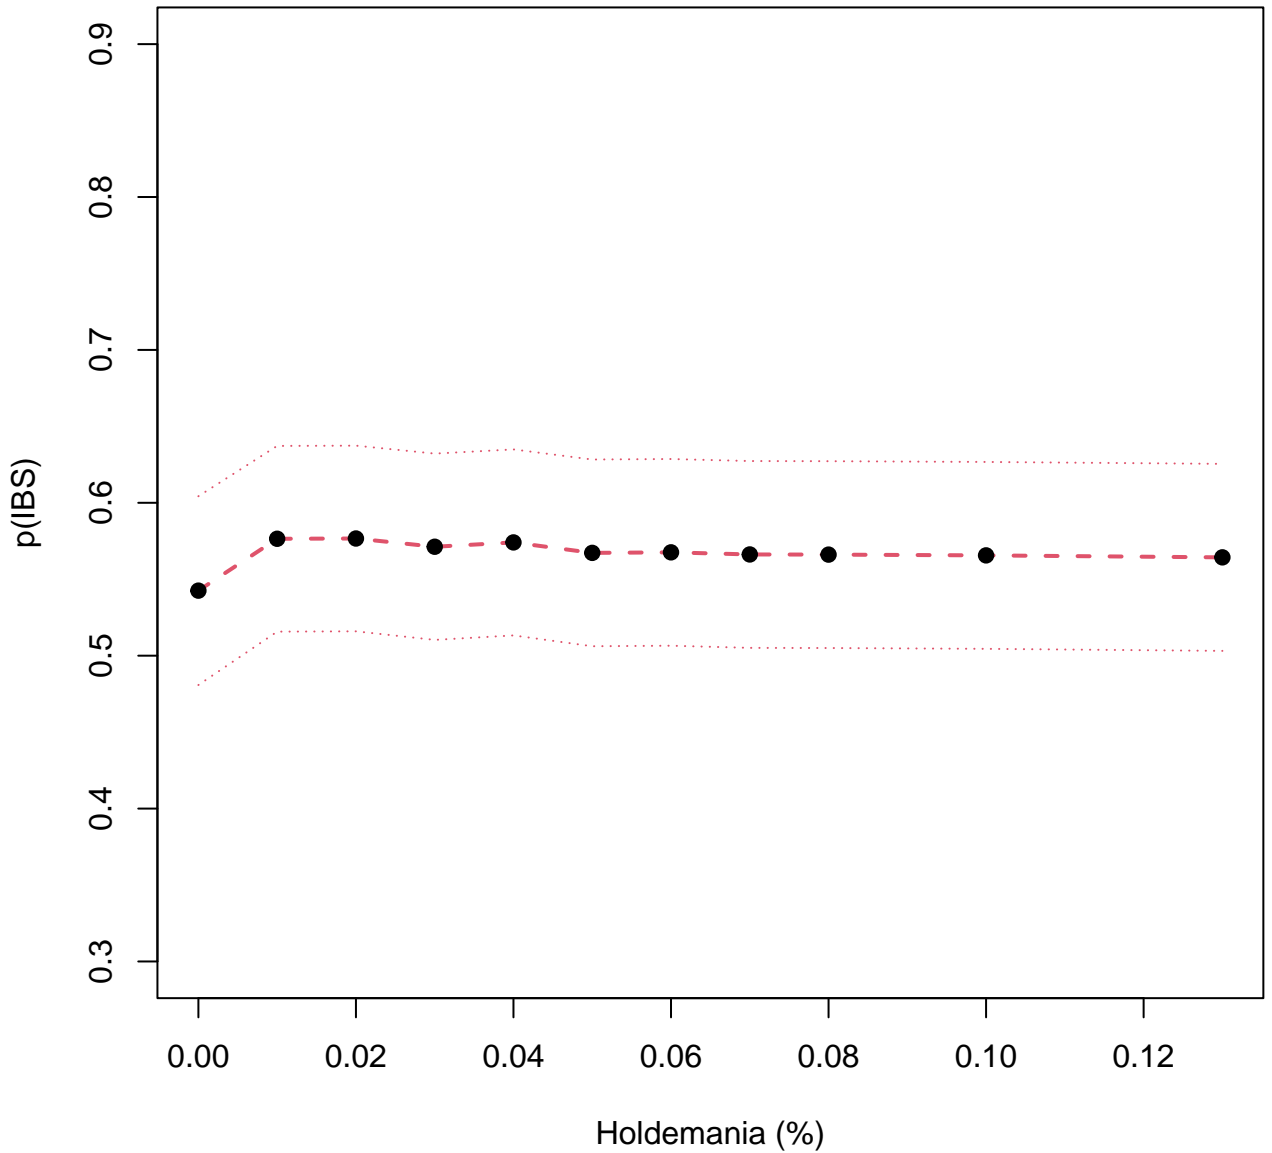

# IBS vs ANHAC

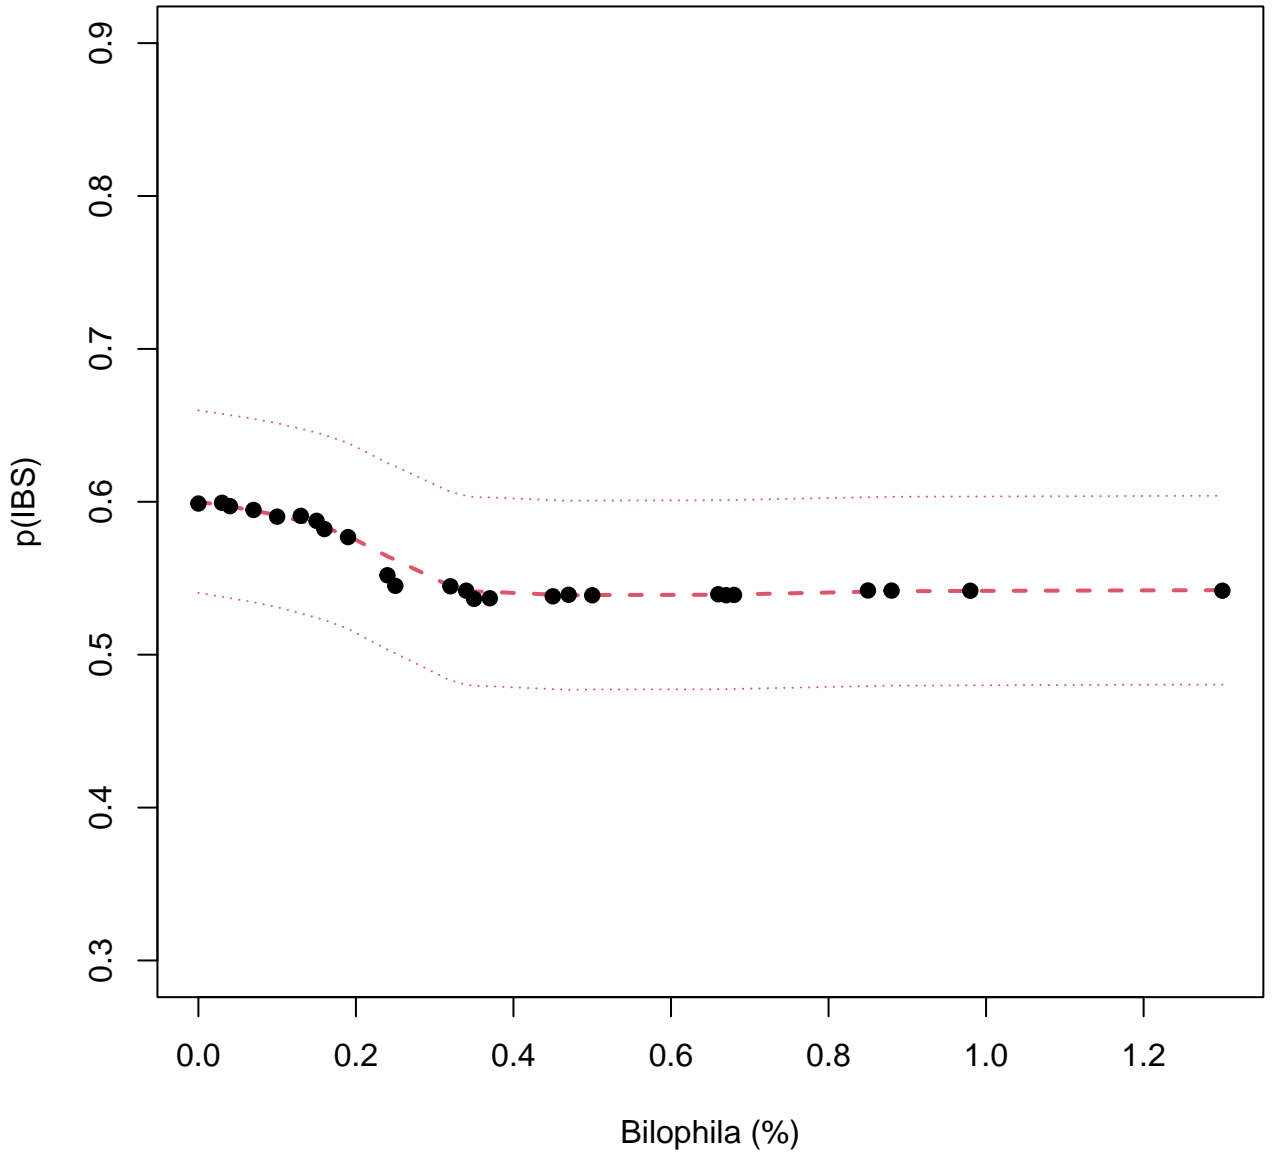

# IBS vs ANHAC

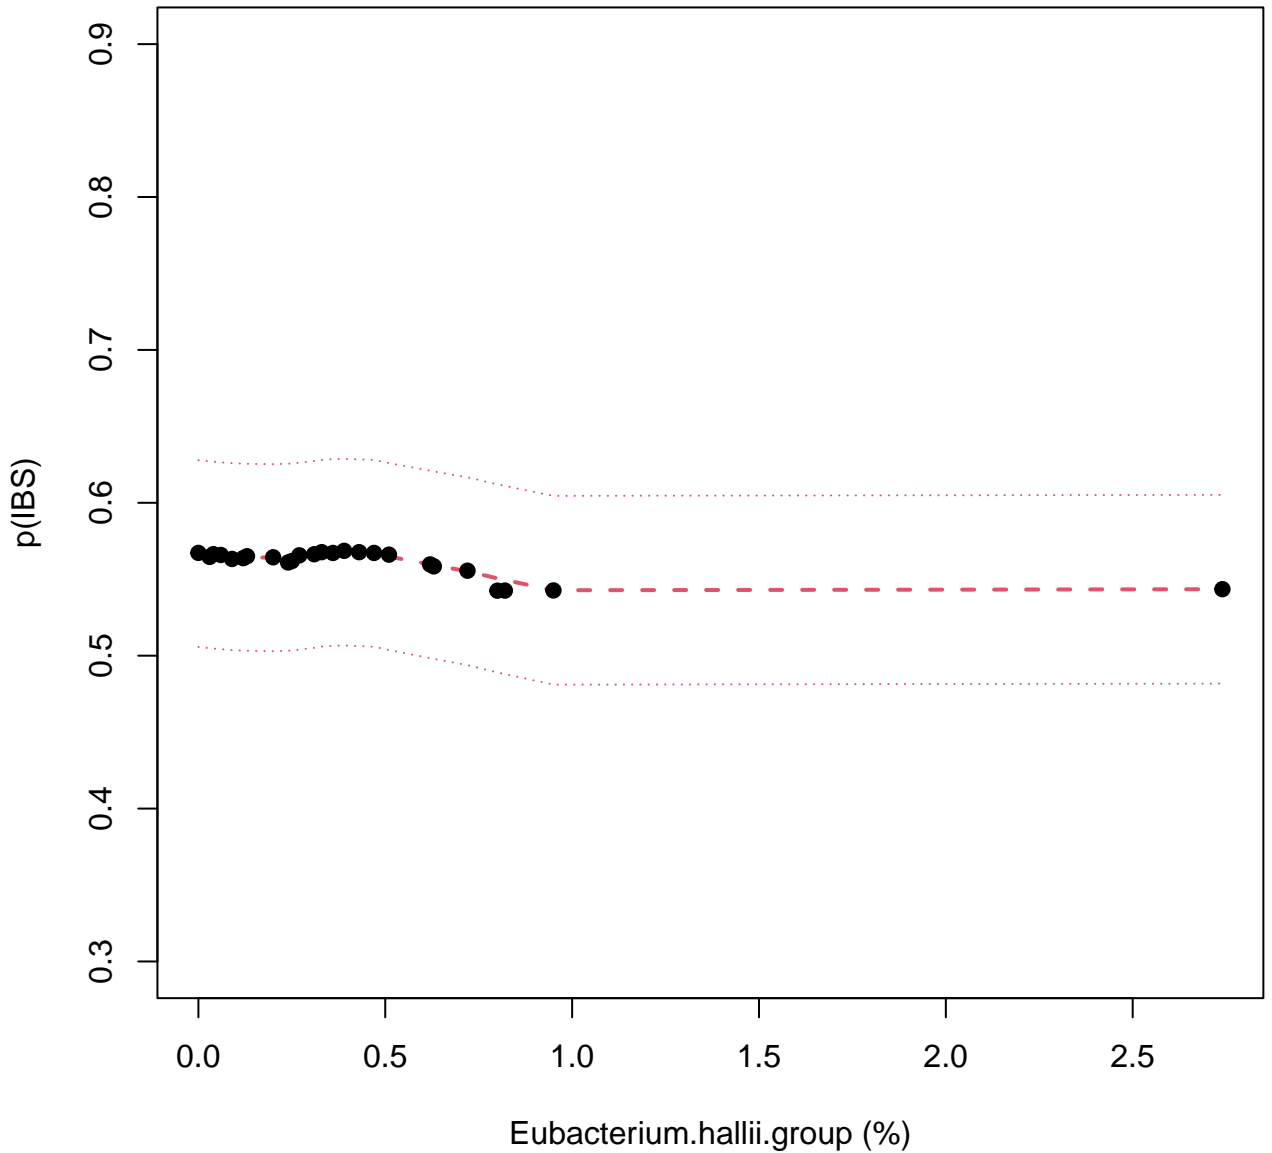



# IBS vs ANHAC

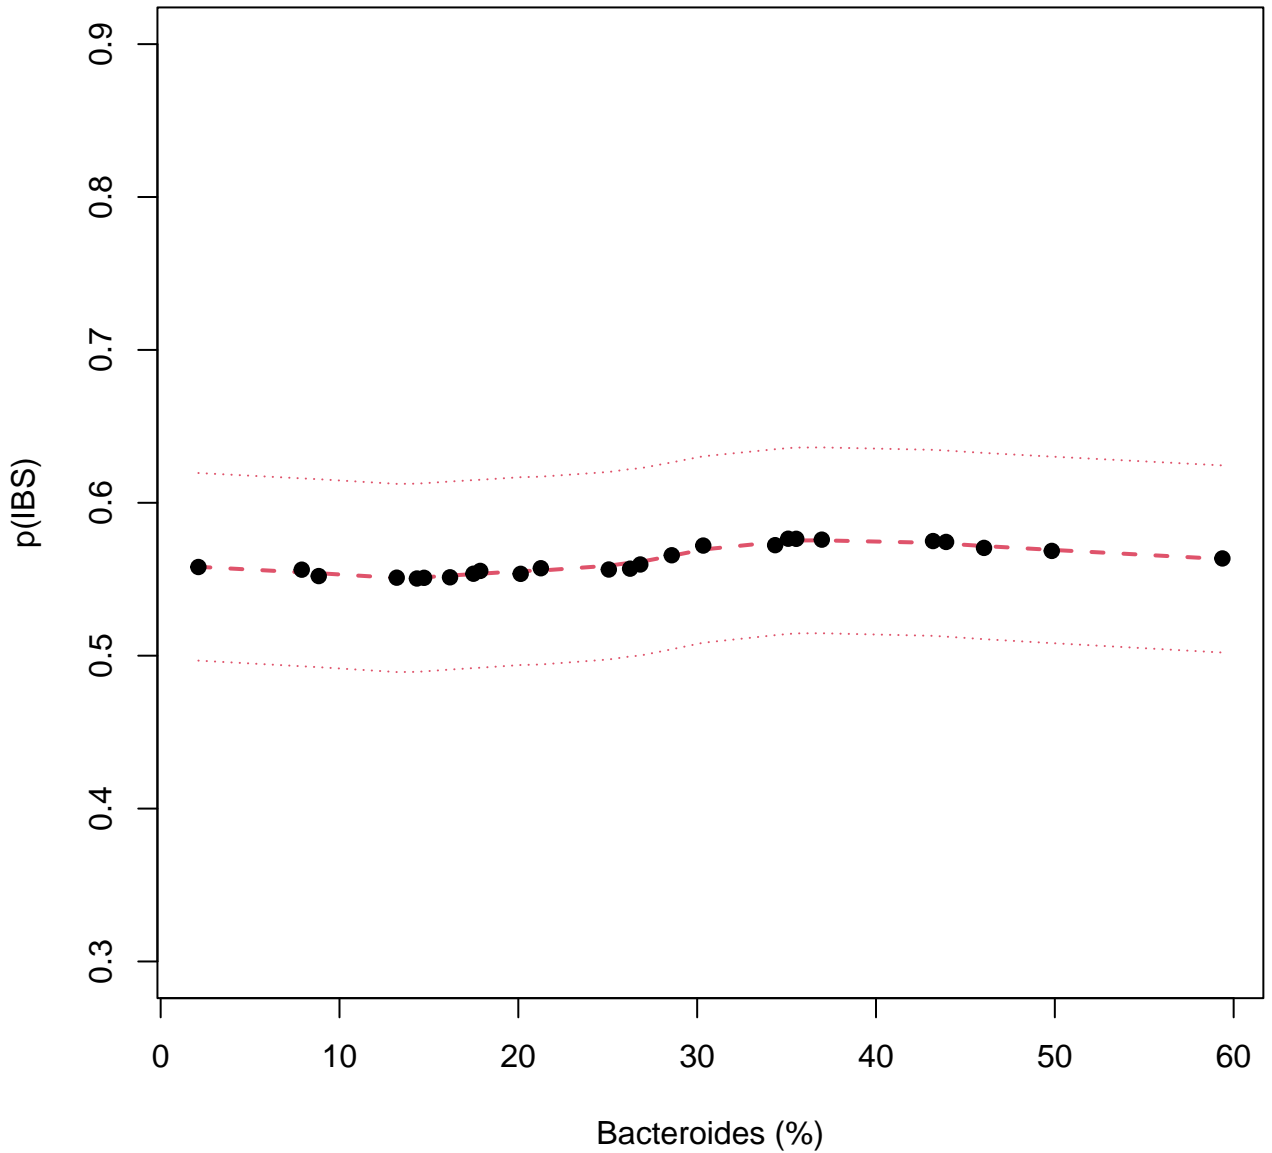

# IBS vs ANHAC

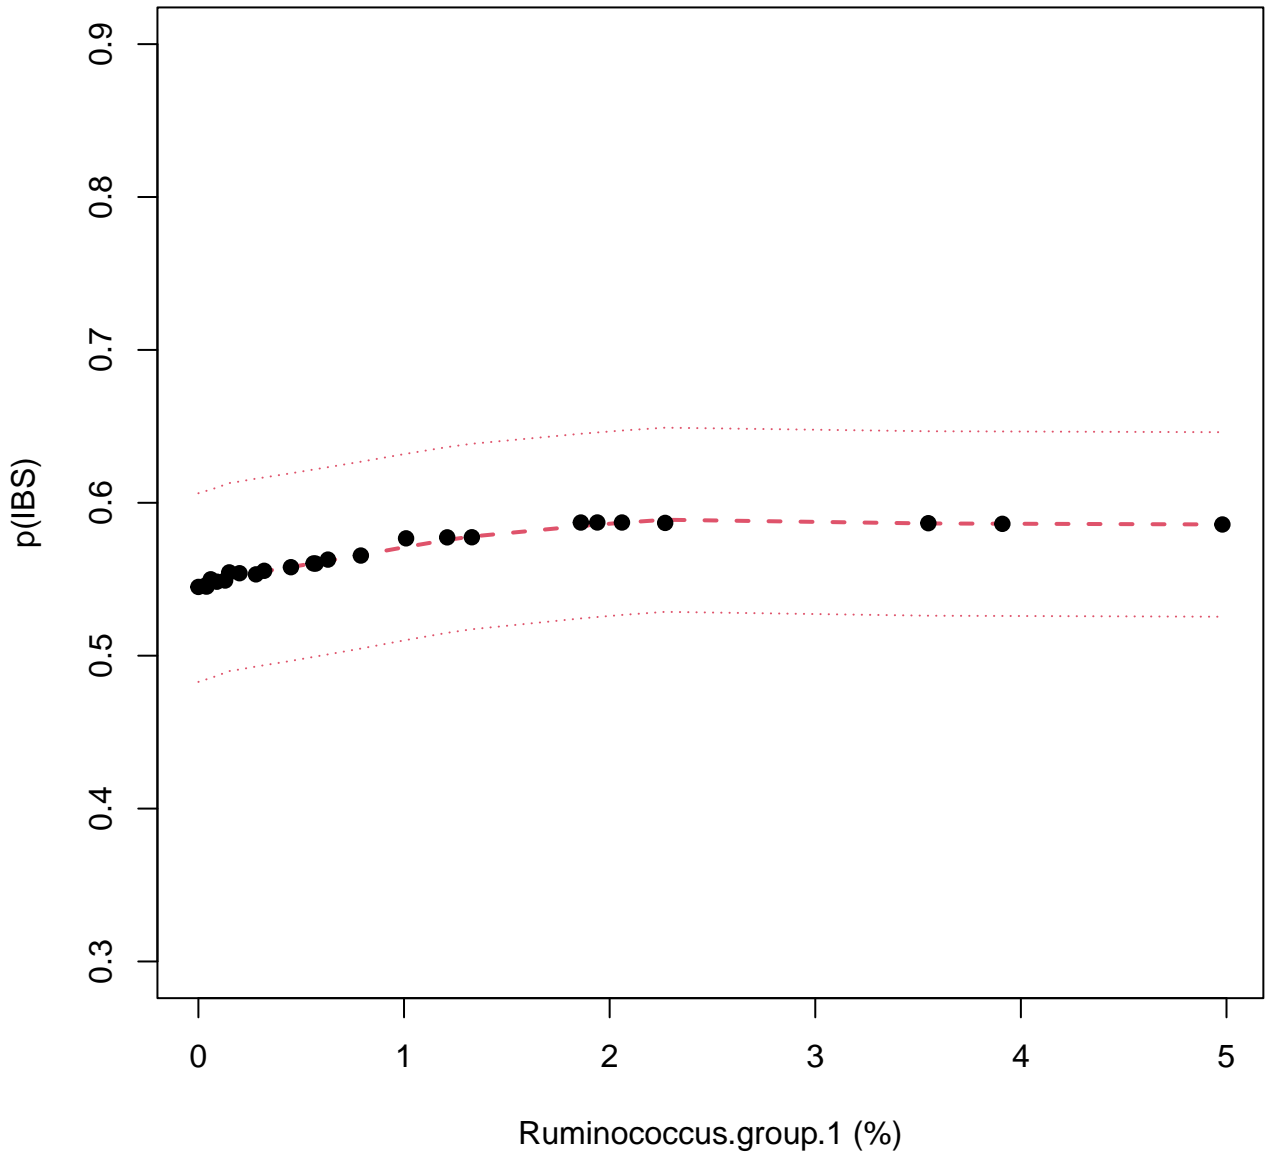

# IBS vs ANHAC

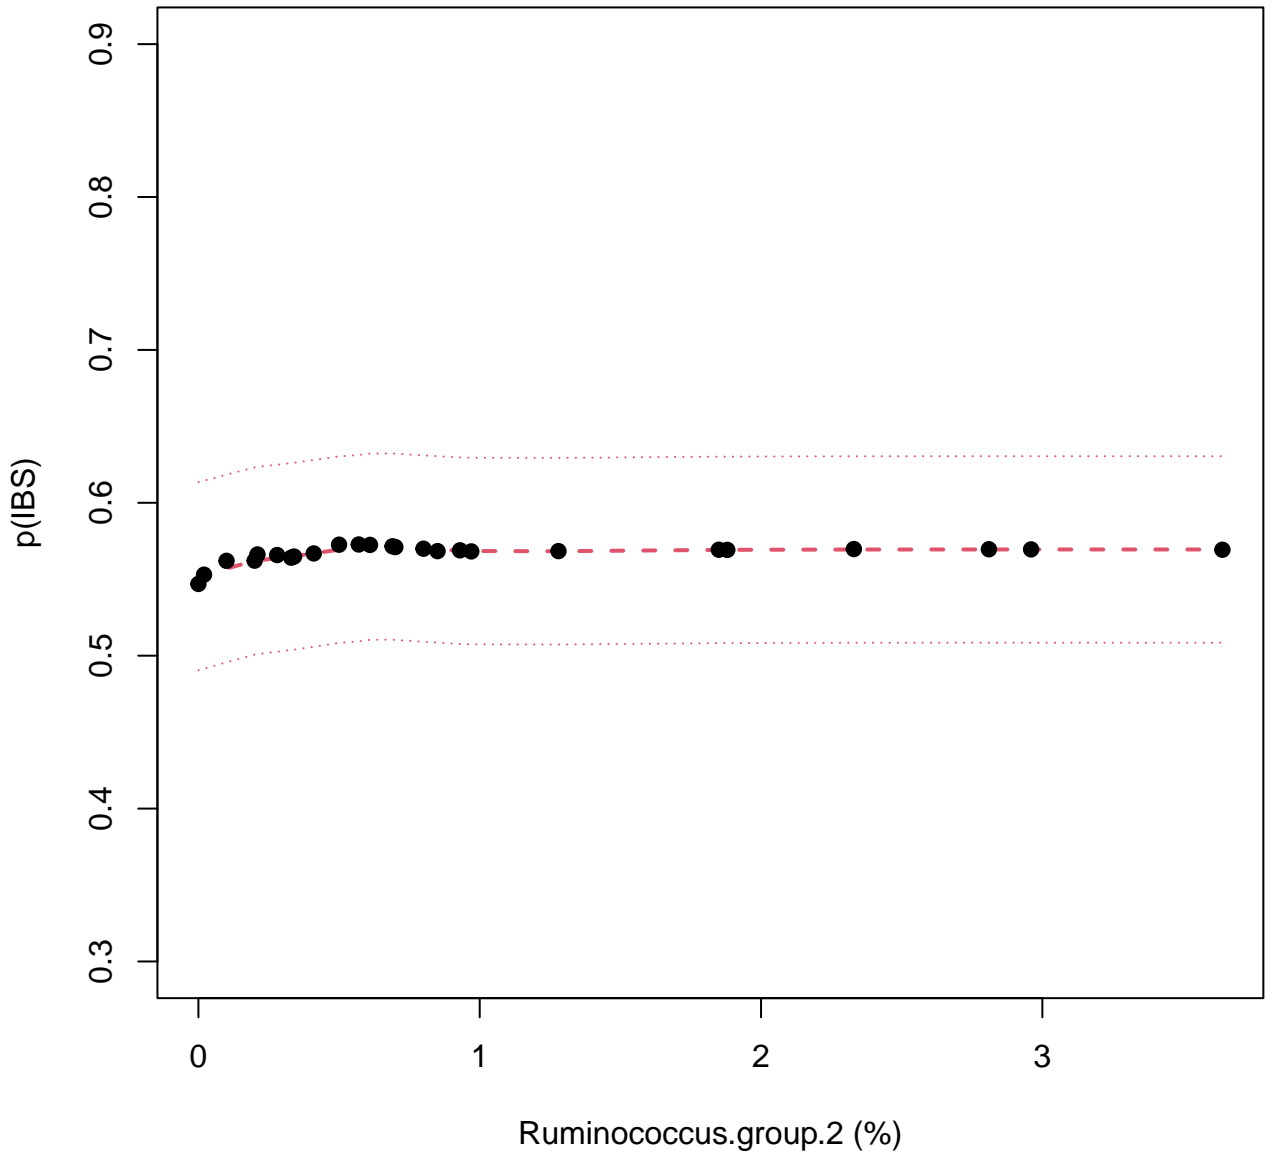

# IBS vs ANHAC

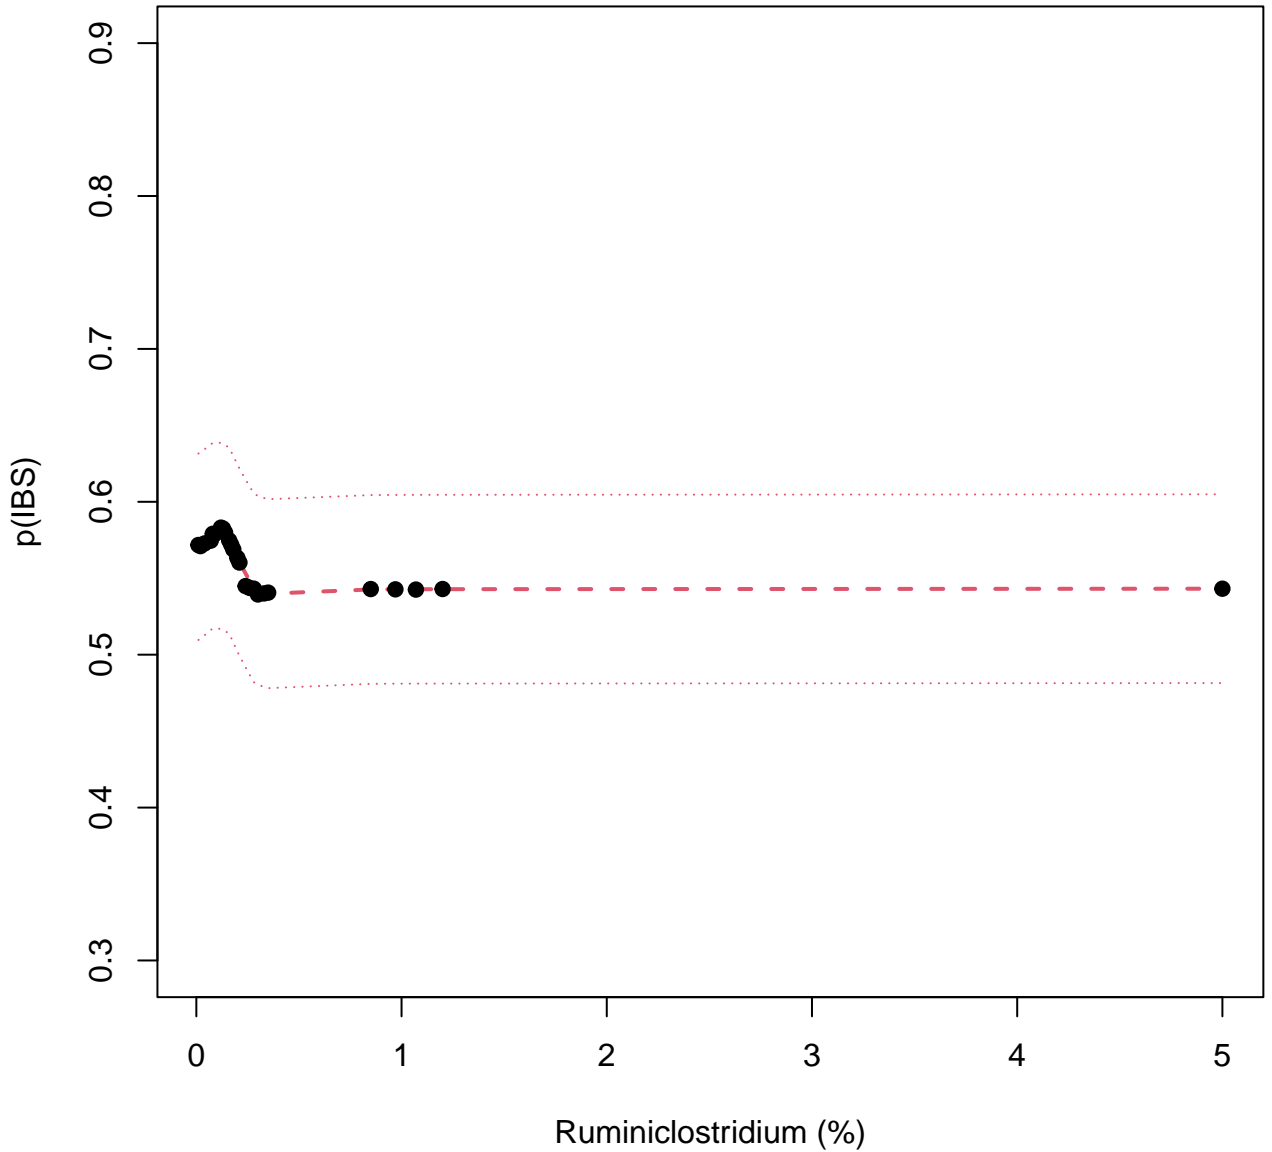

# IBS vs ANHAC

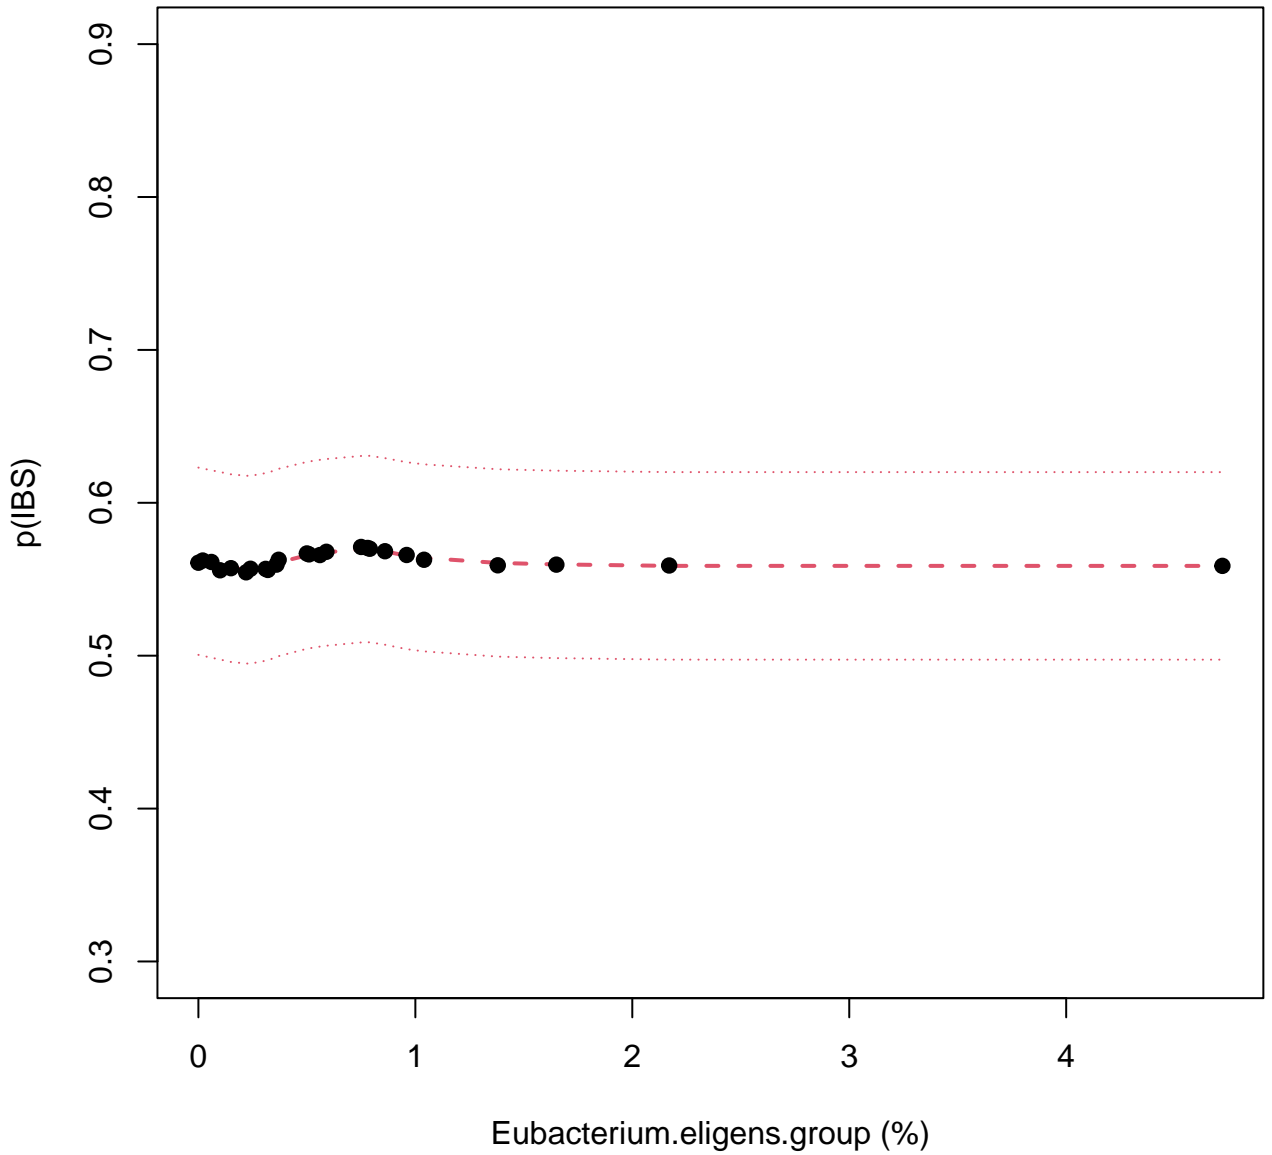

# IBS vs ANHAC

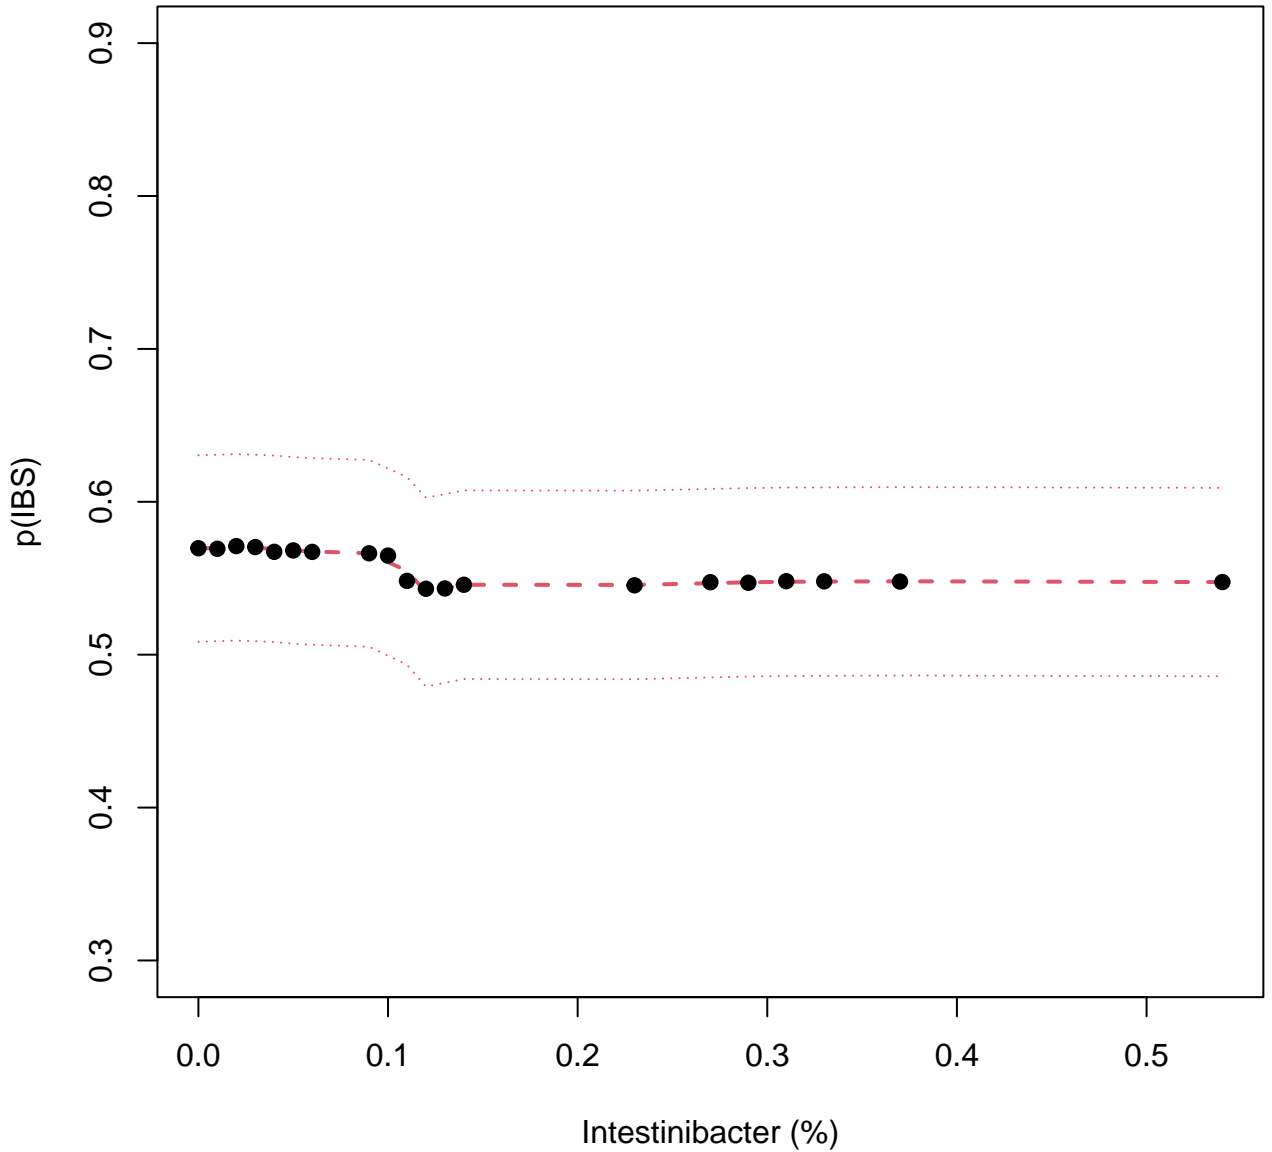

# IBS vs ANHAC

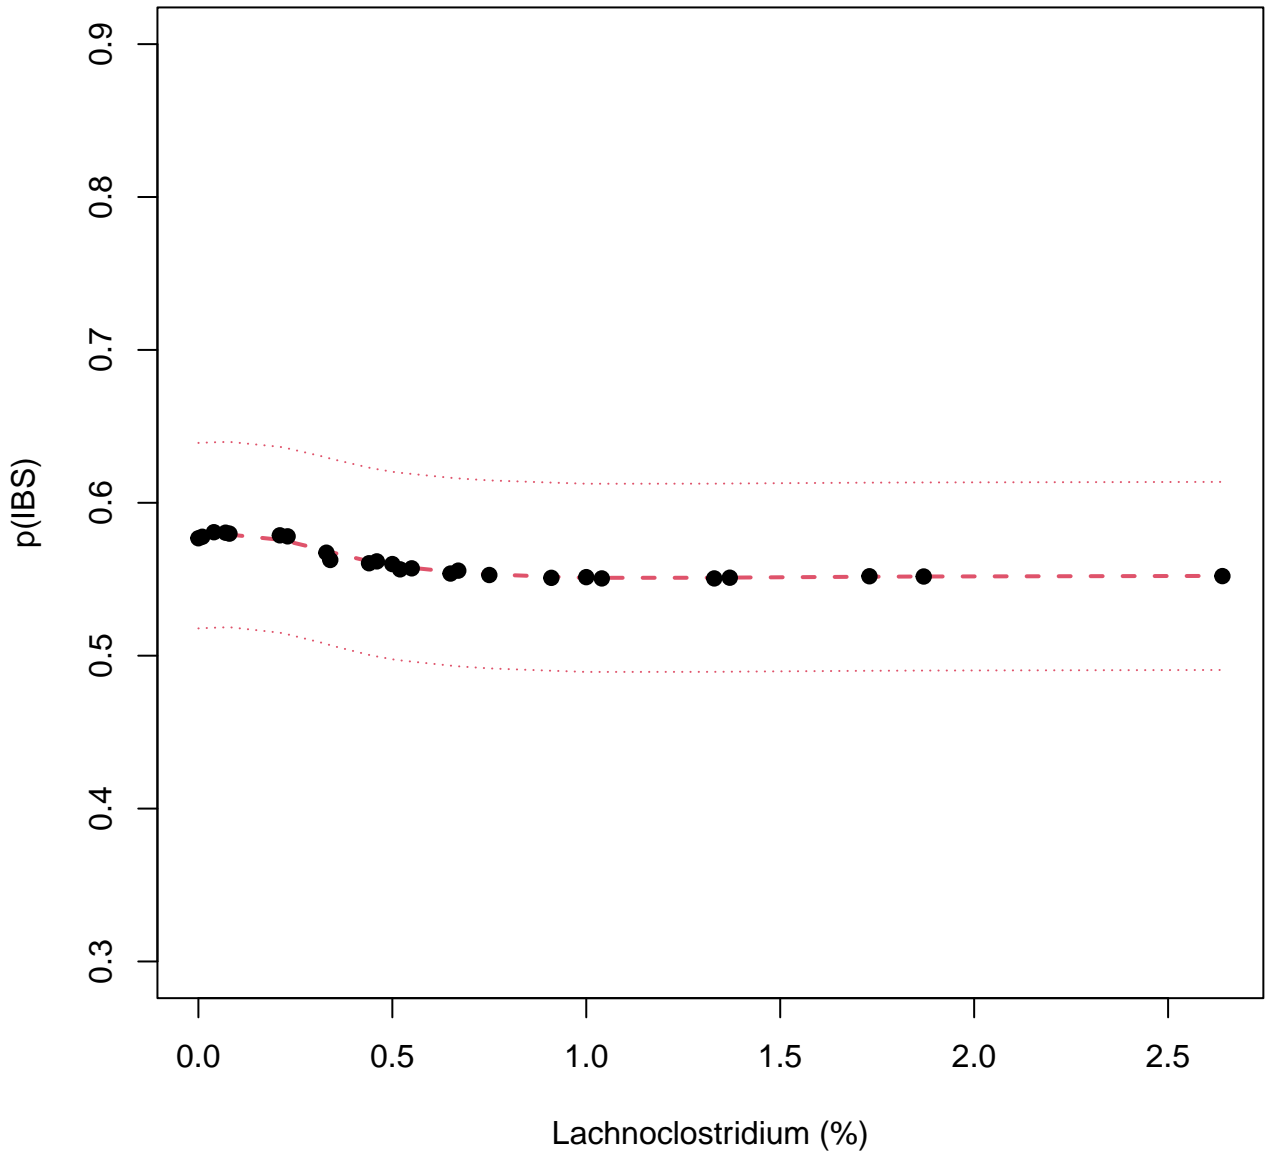

# IBS vs ANHAC

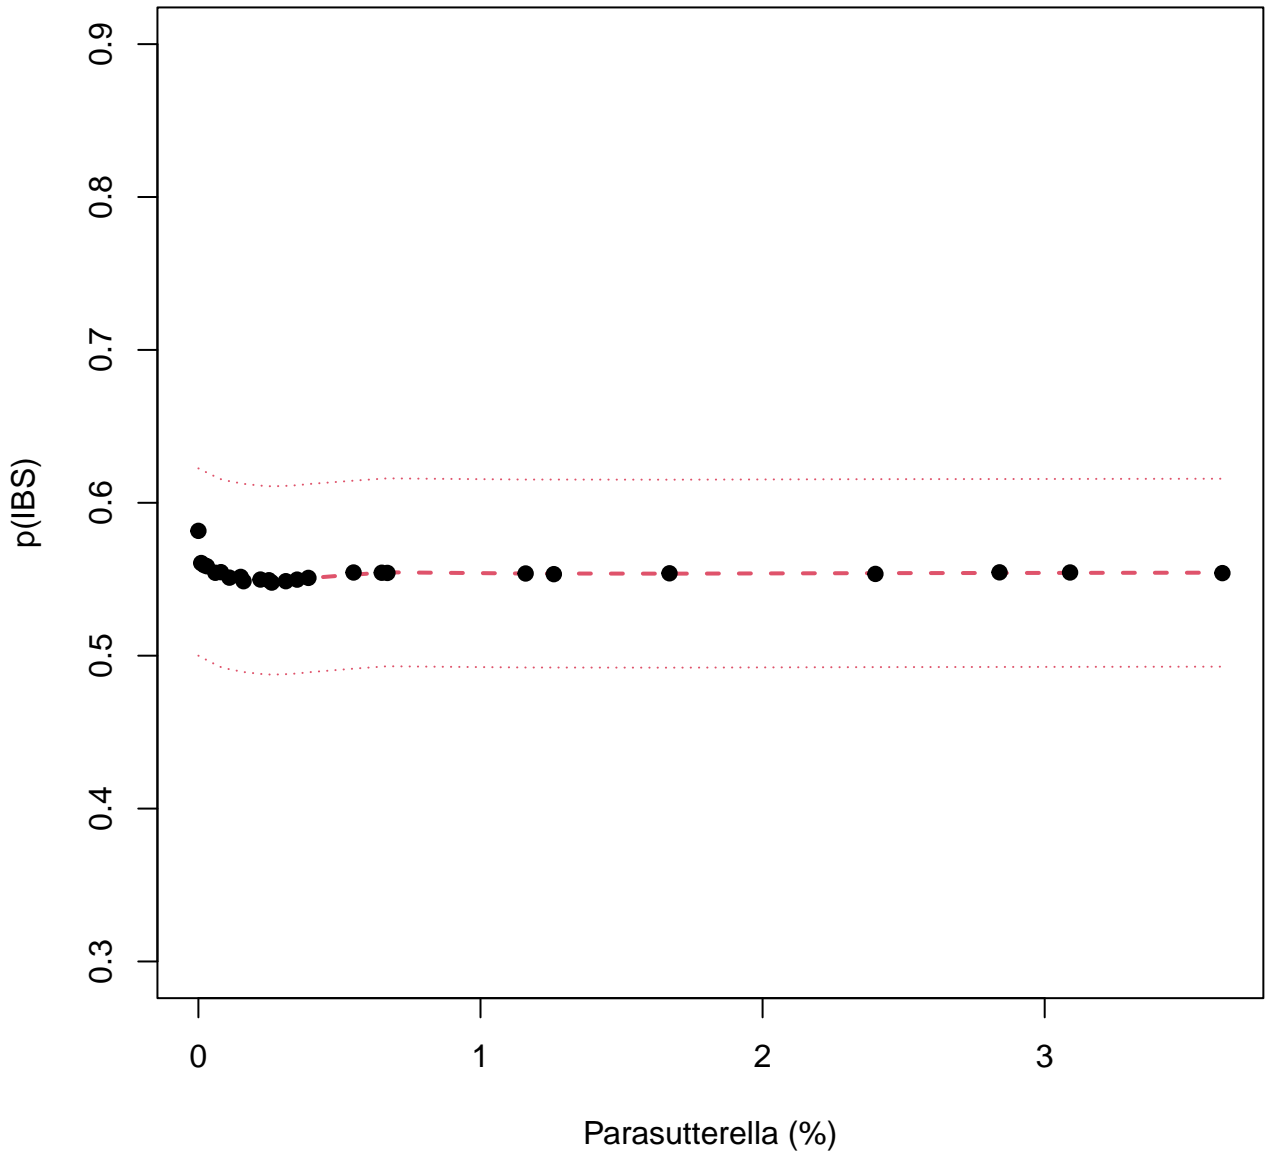



# IBS vs ANHAC

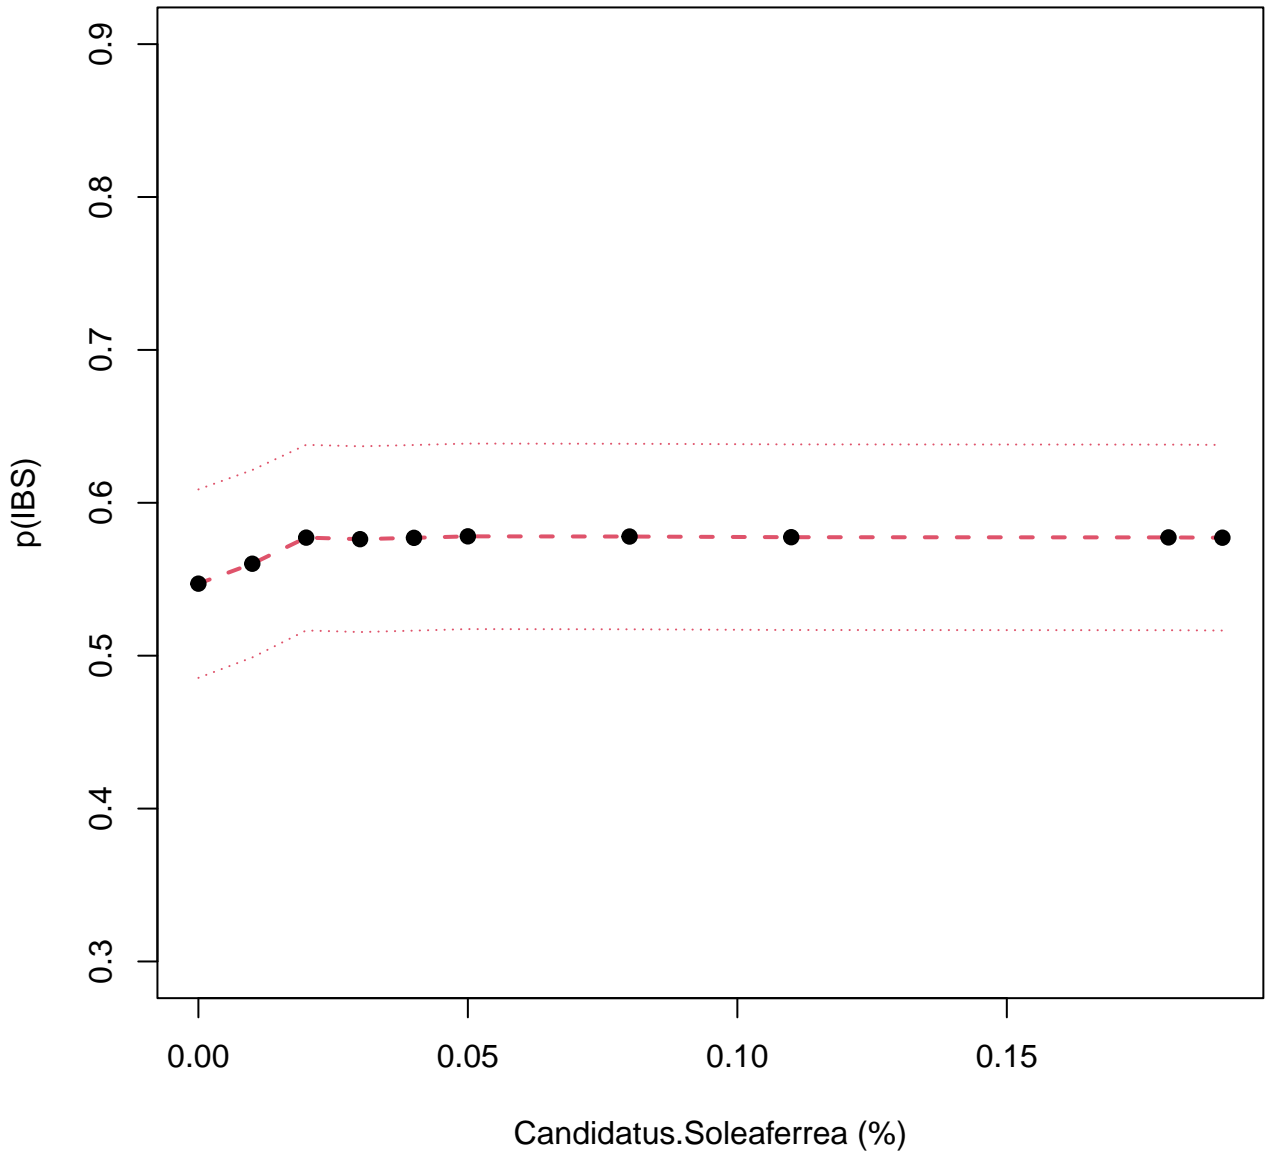

# IBS vs ANHAC

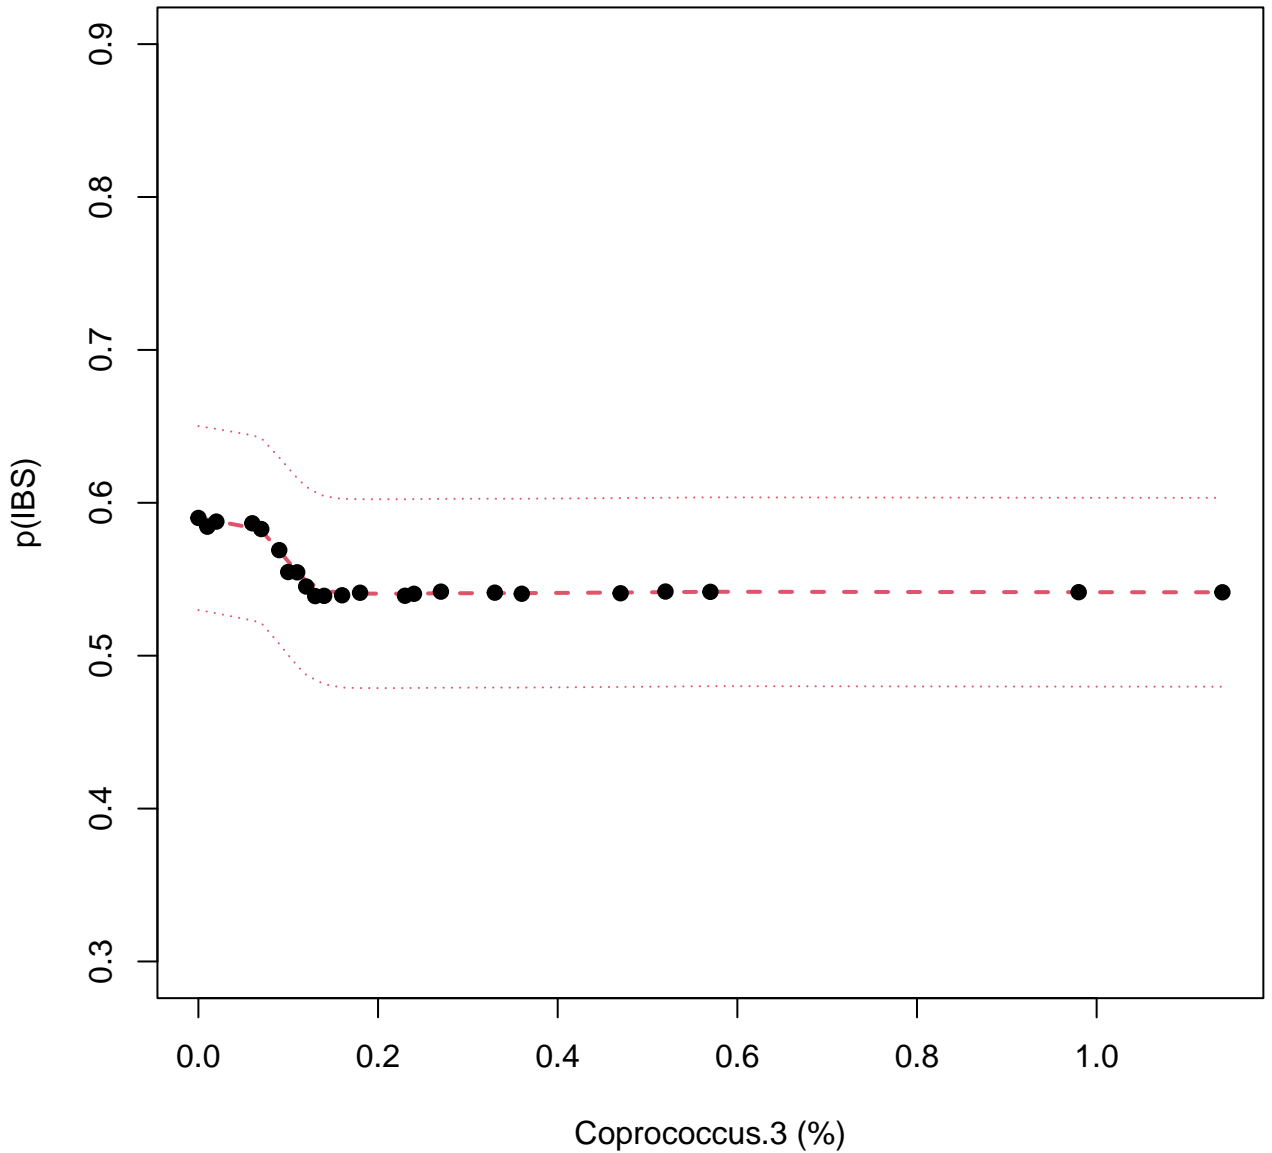

# IBS vs ANHAC

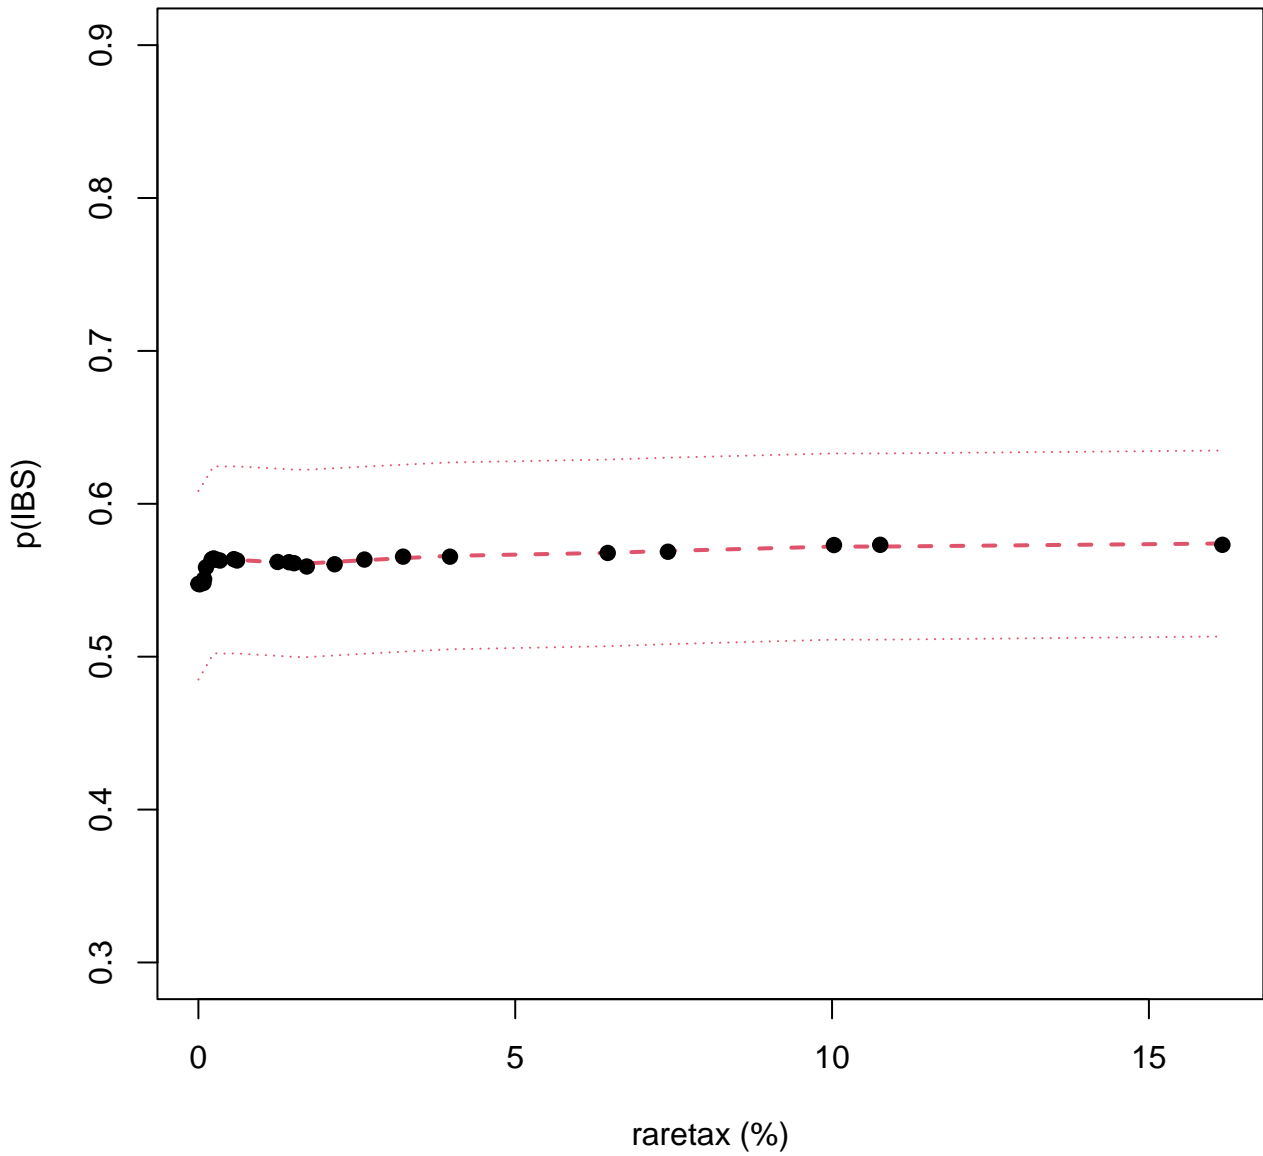

# ANHAC v Ca genus

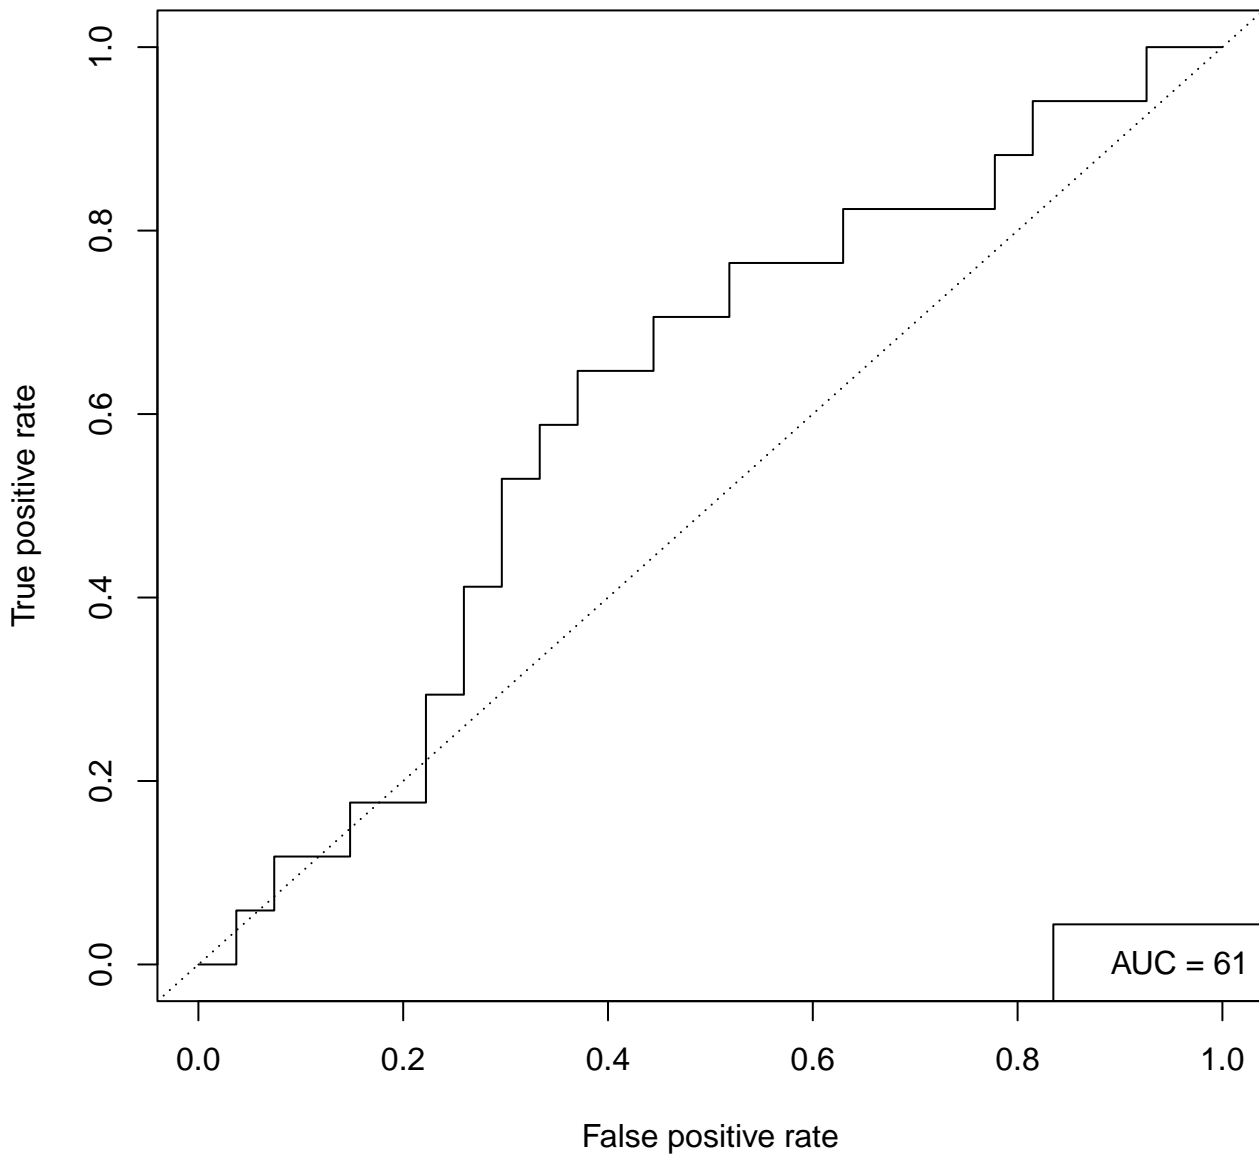

# Cancer vs ANHAC

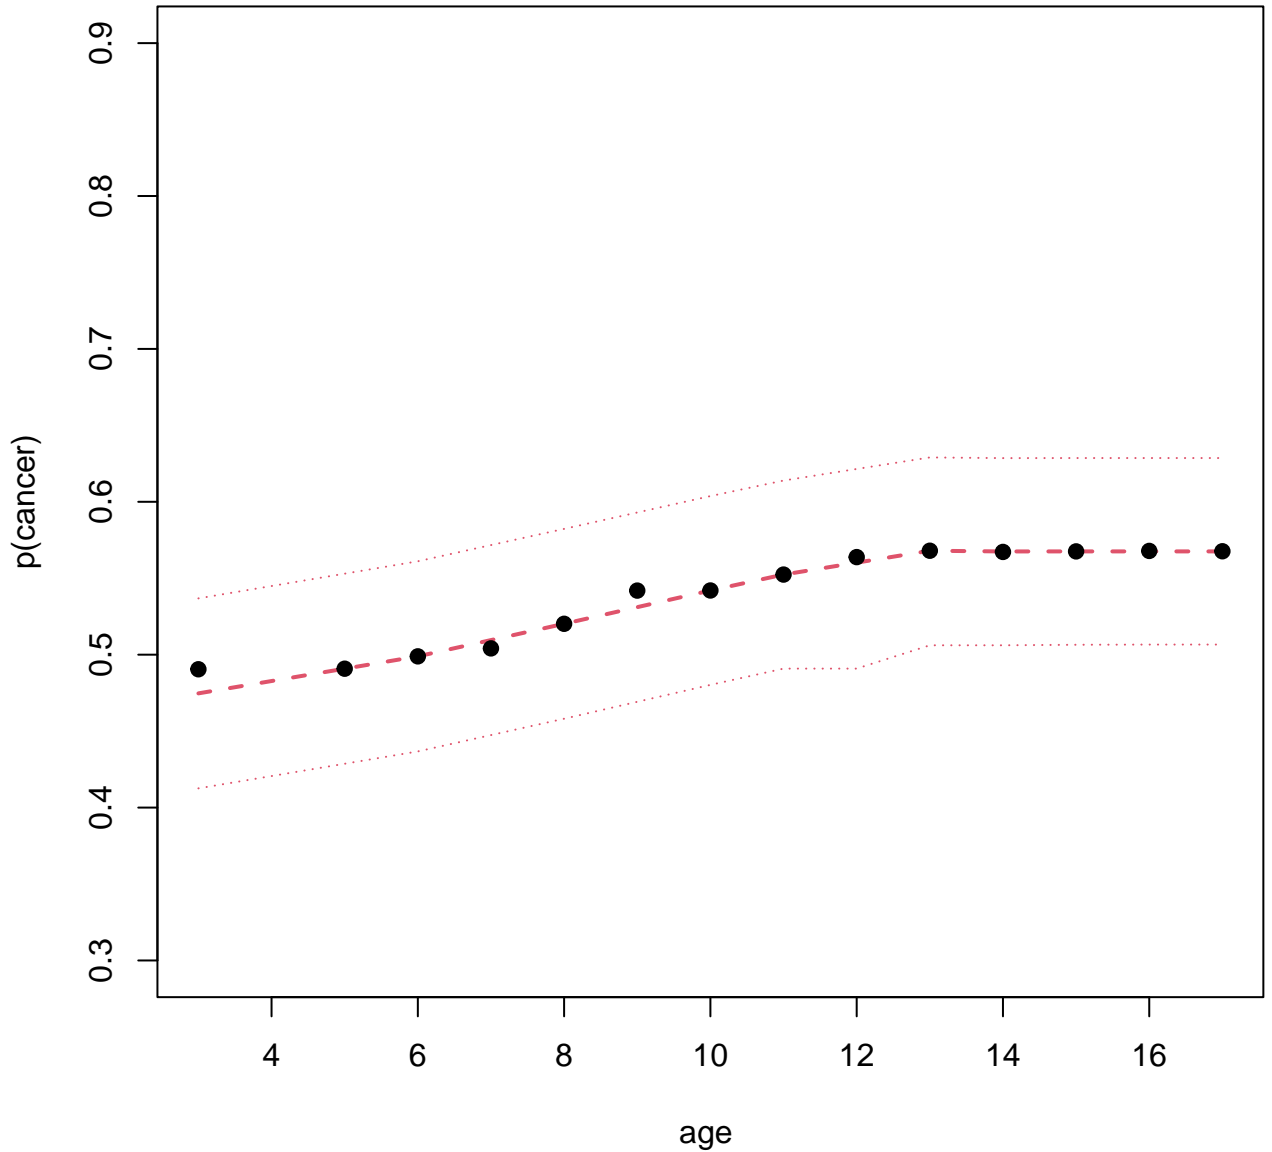

# Cancer vs ANHAC

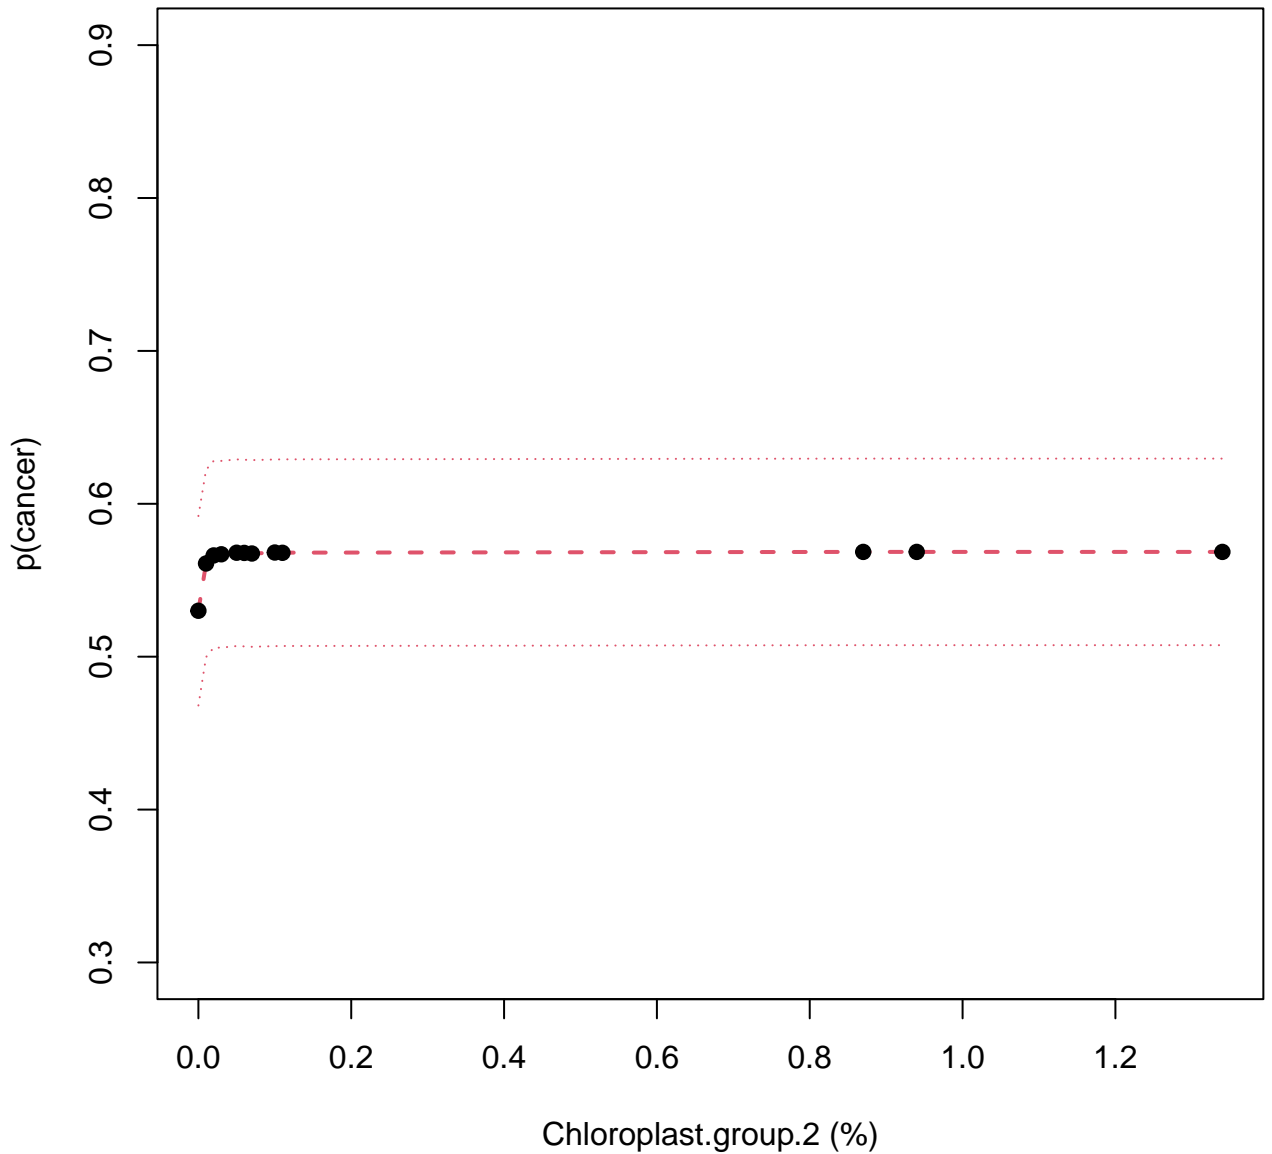

# Cancer vs ANHAC

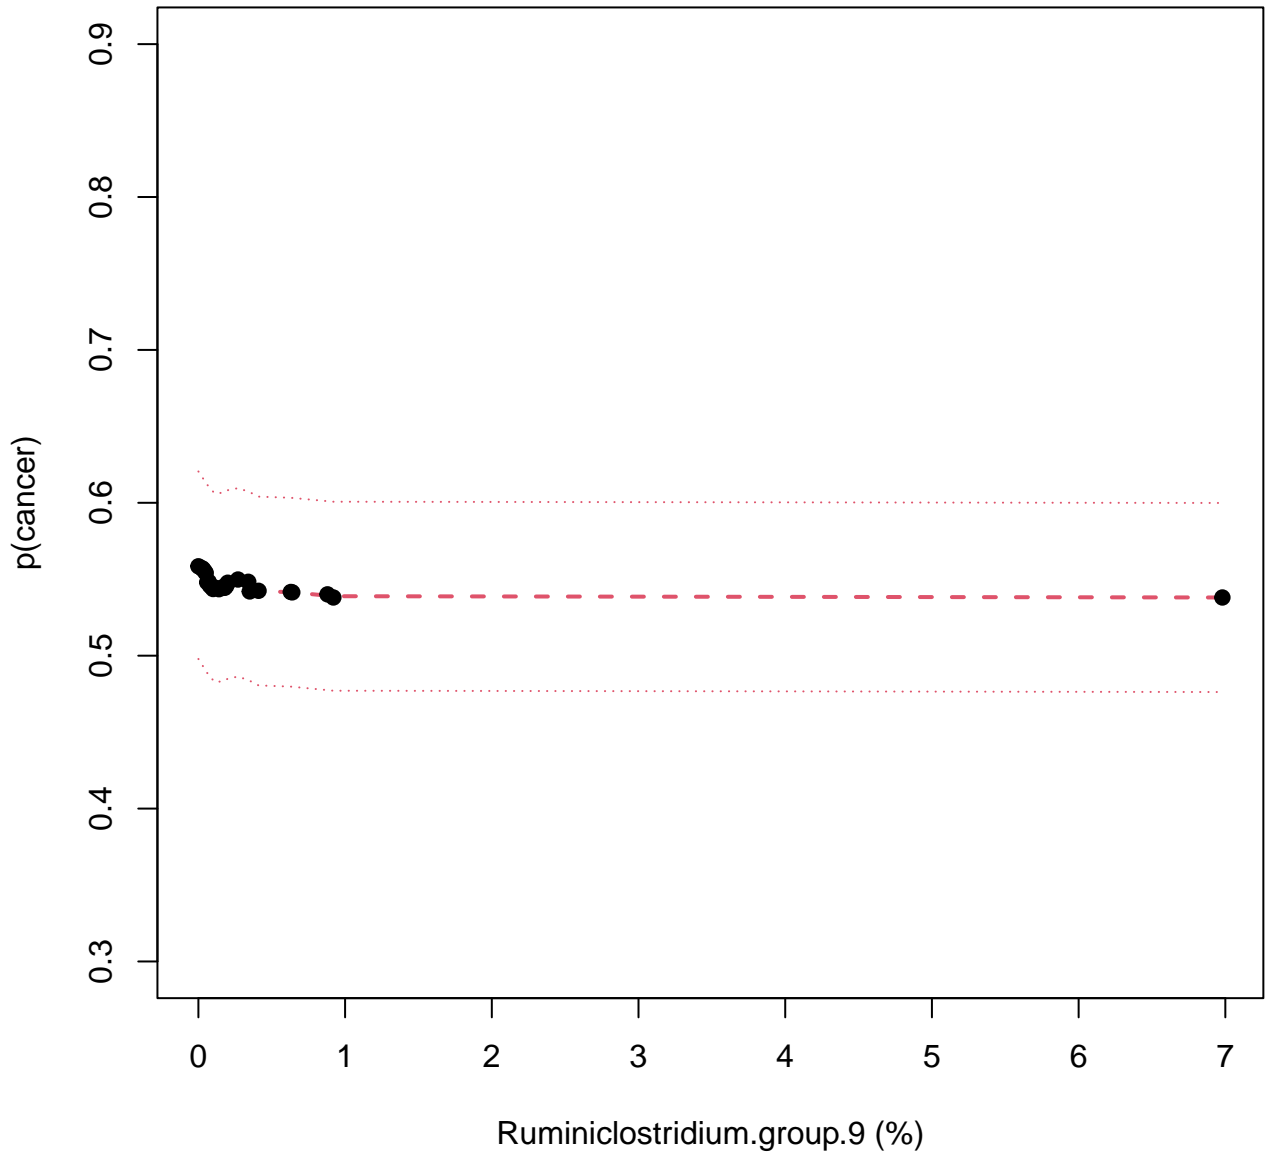

# Cancer vs ANHAC

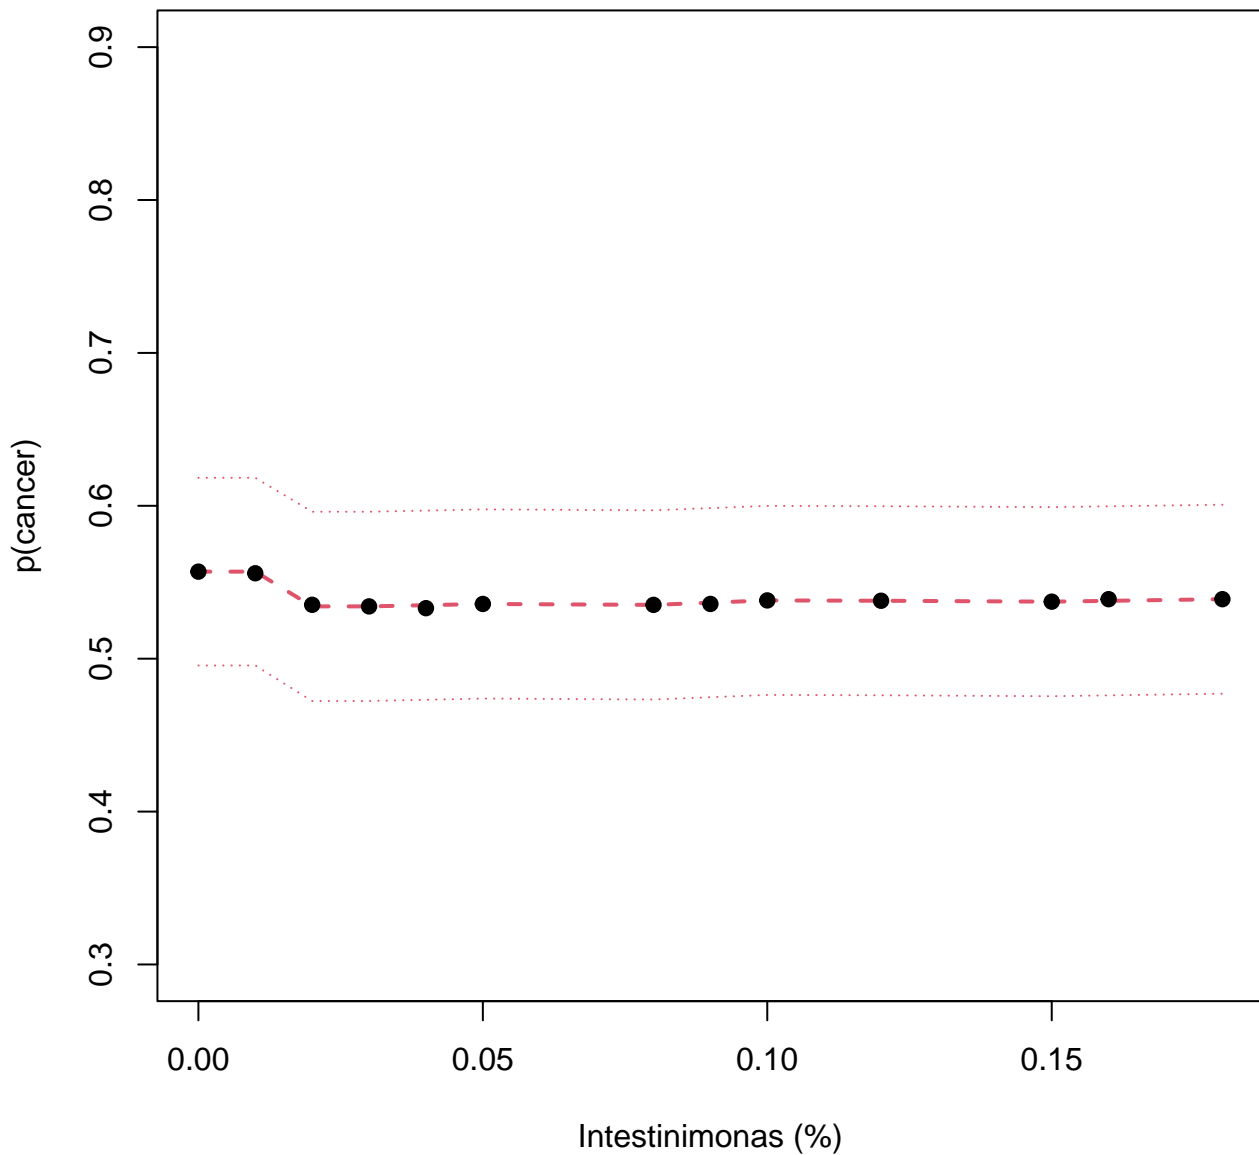



# Cancer vs ANHAC

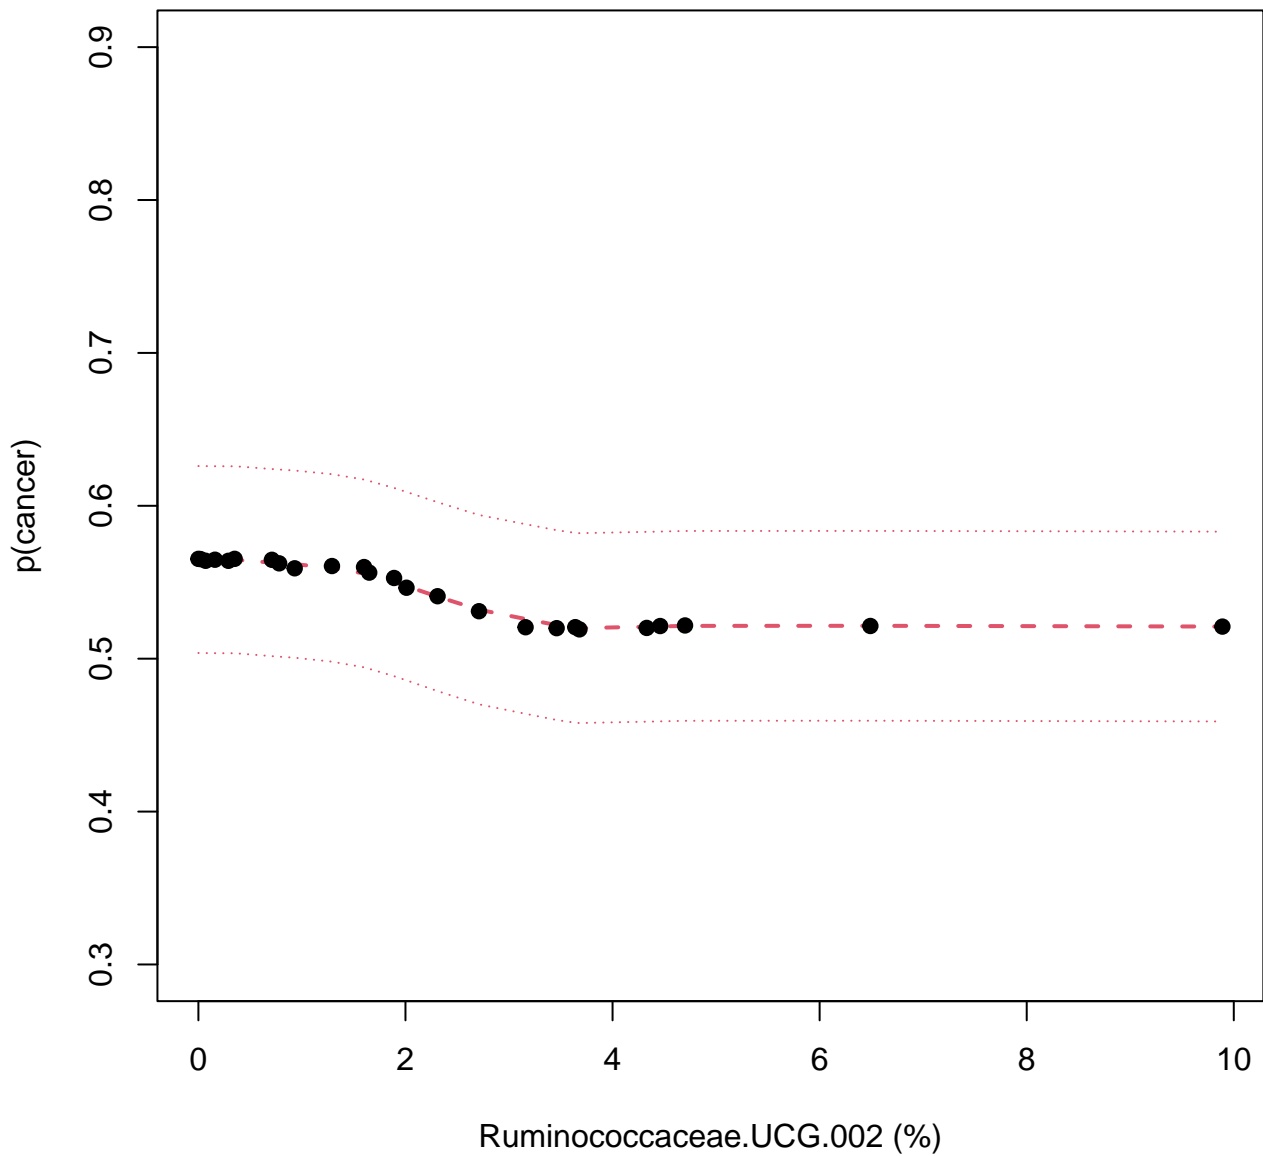

# Cancer vs ANHAC

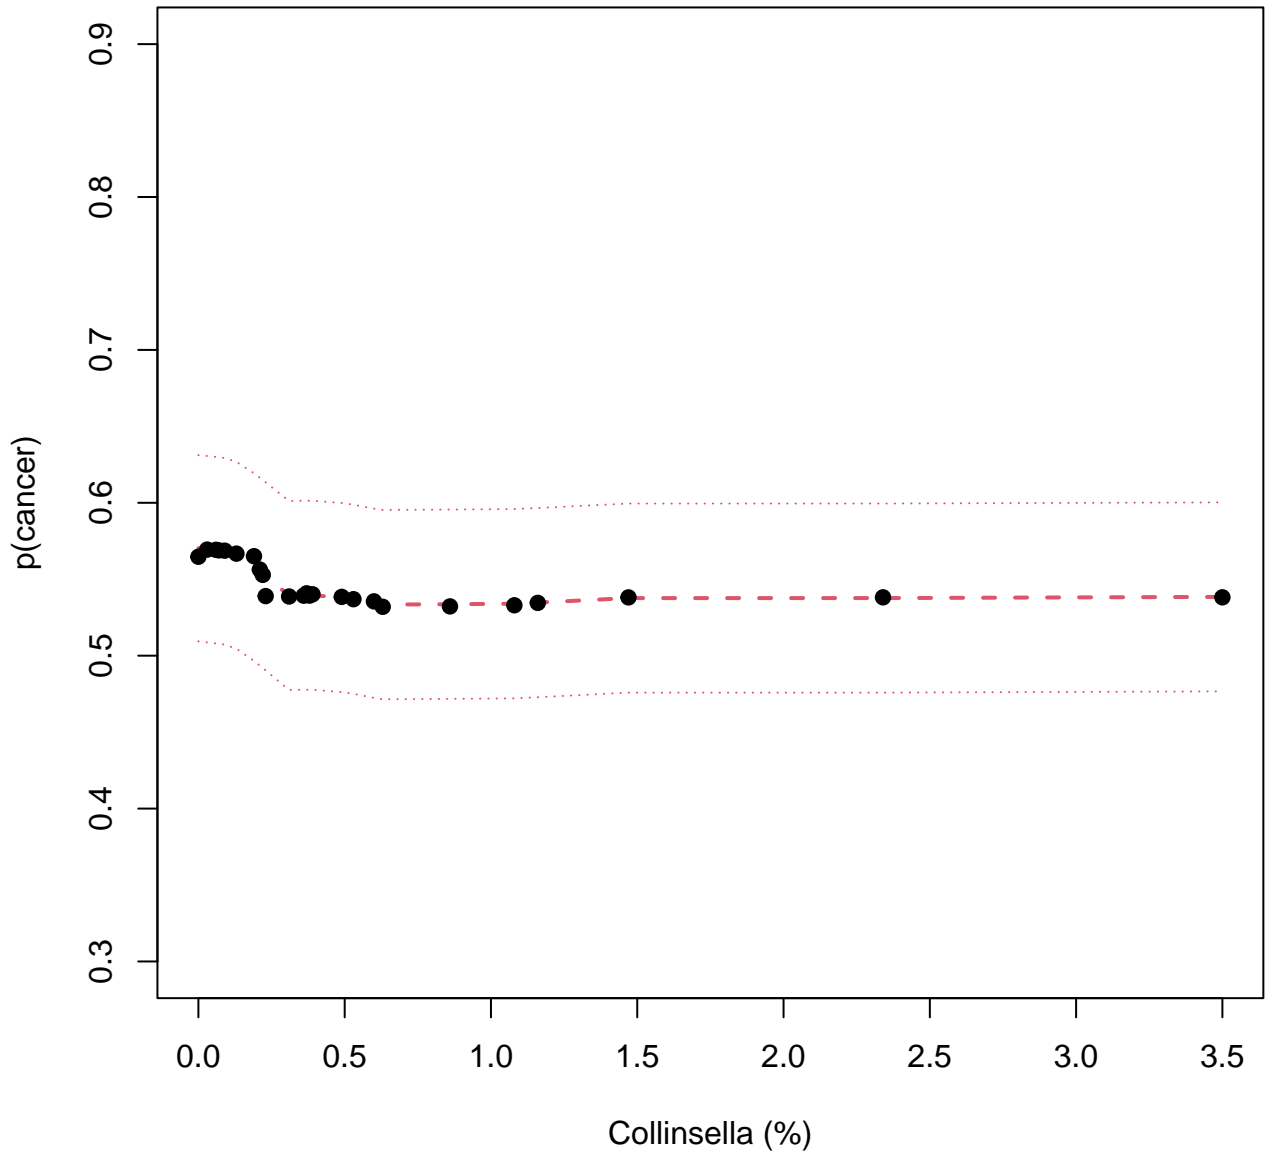

# Cancer vs ANHAC

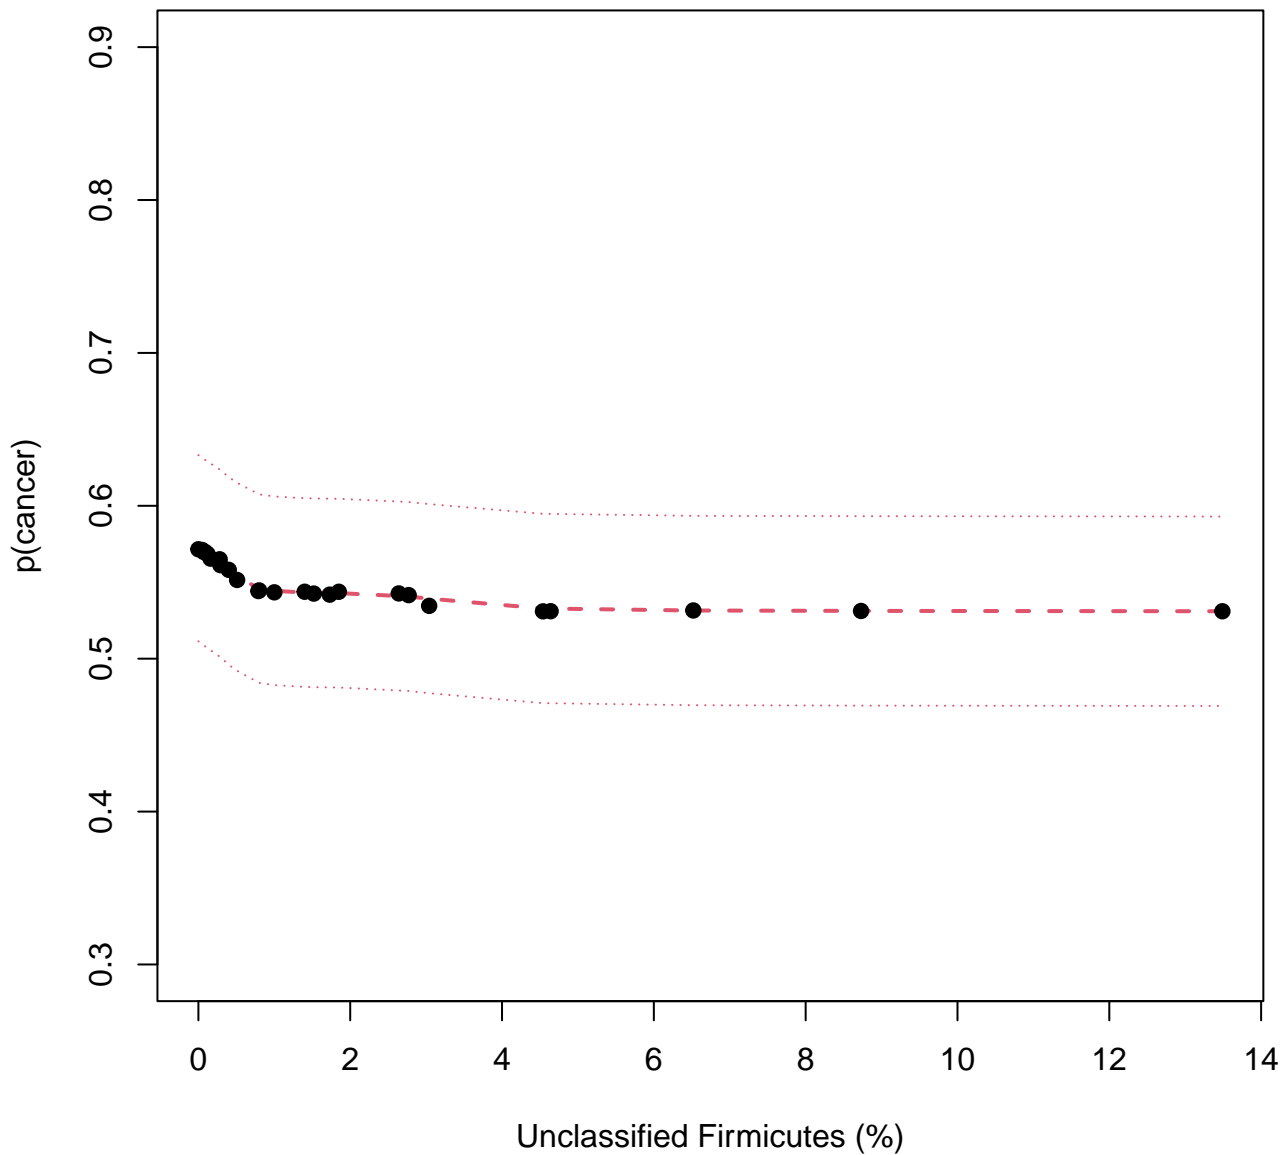

# Cancer vs ANHAC

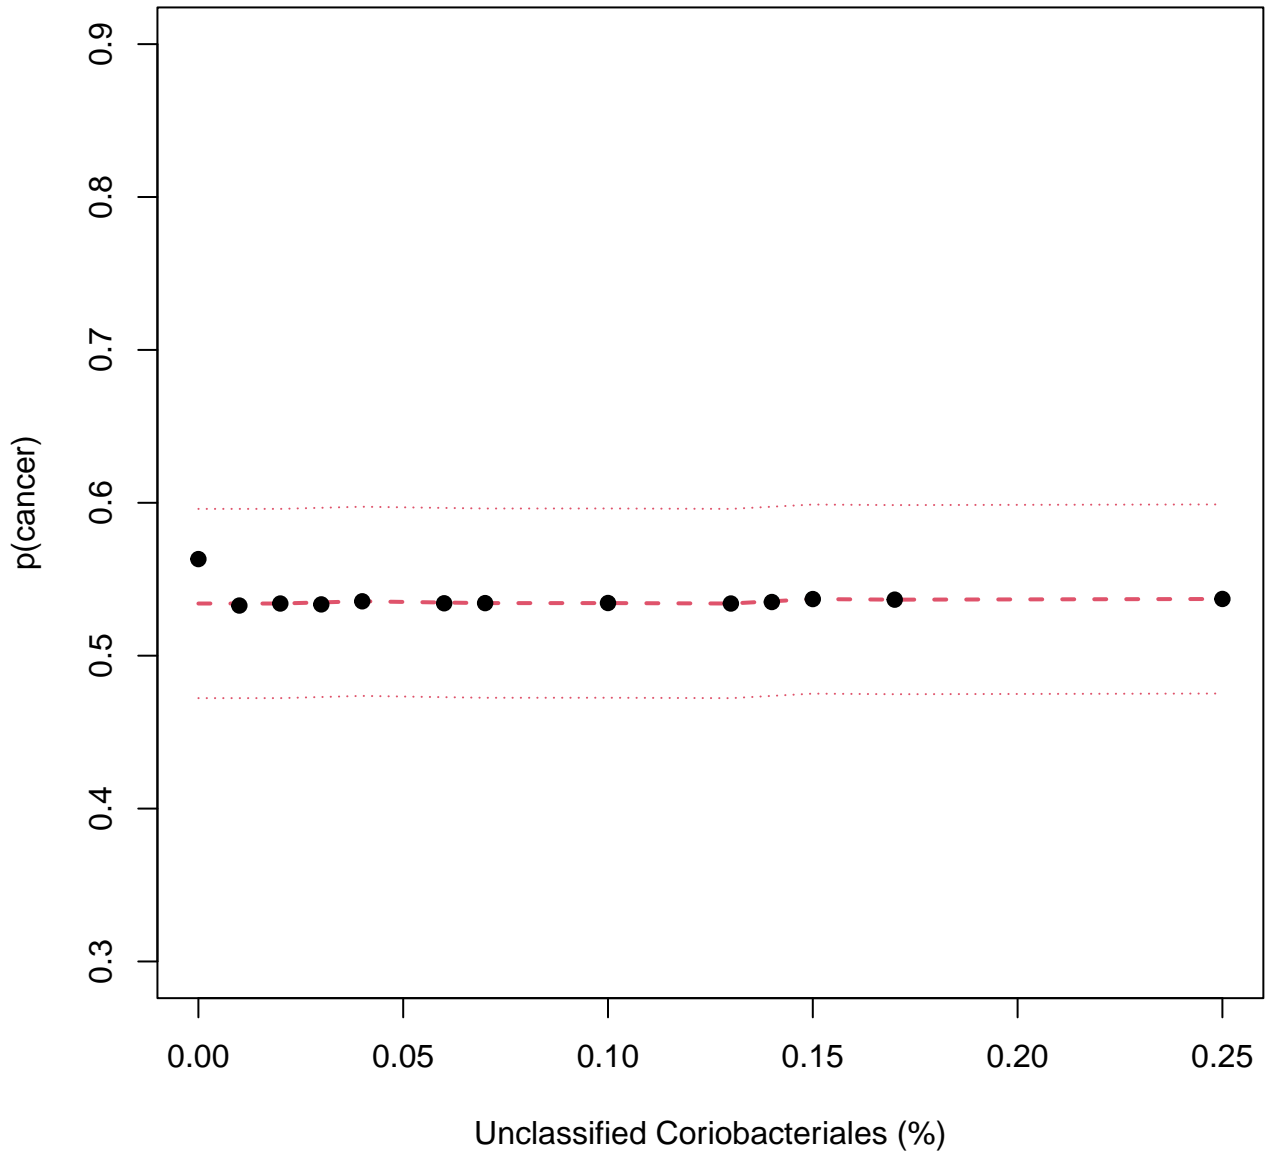

# Cancer vs ANHAC

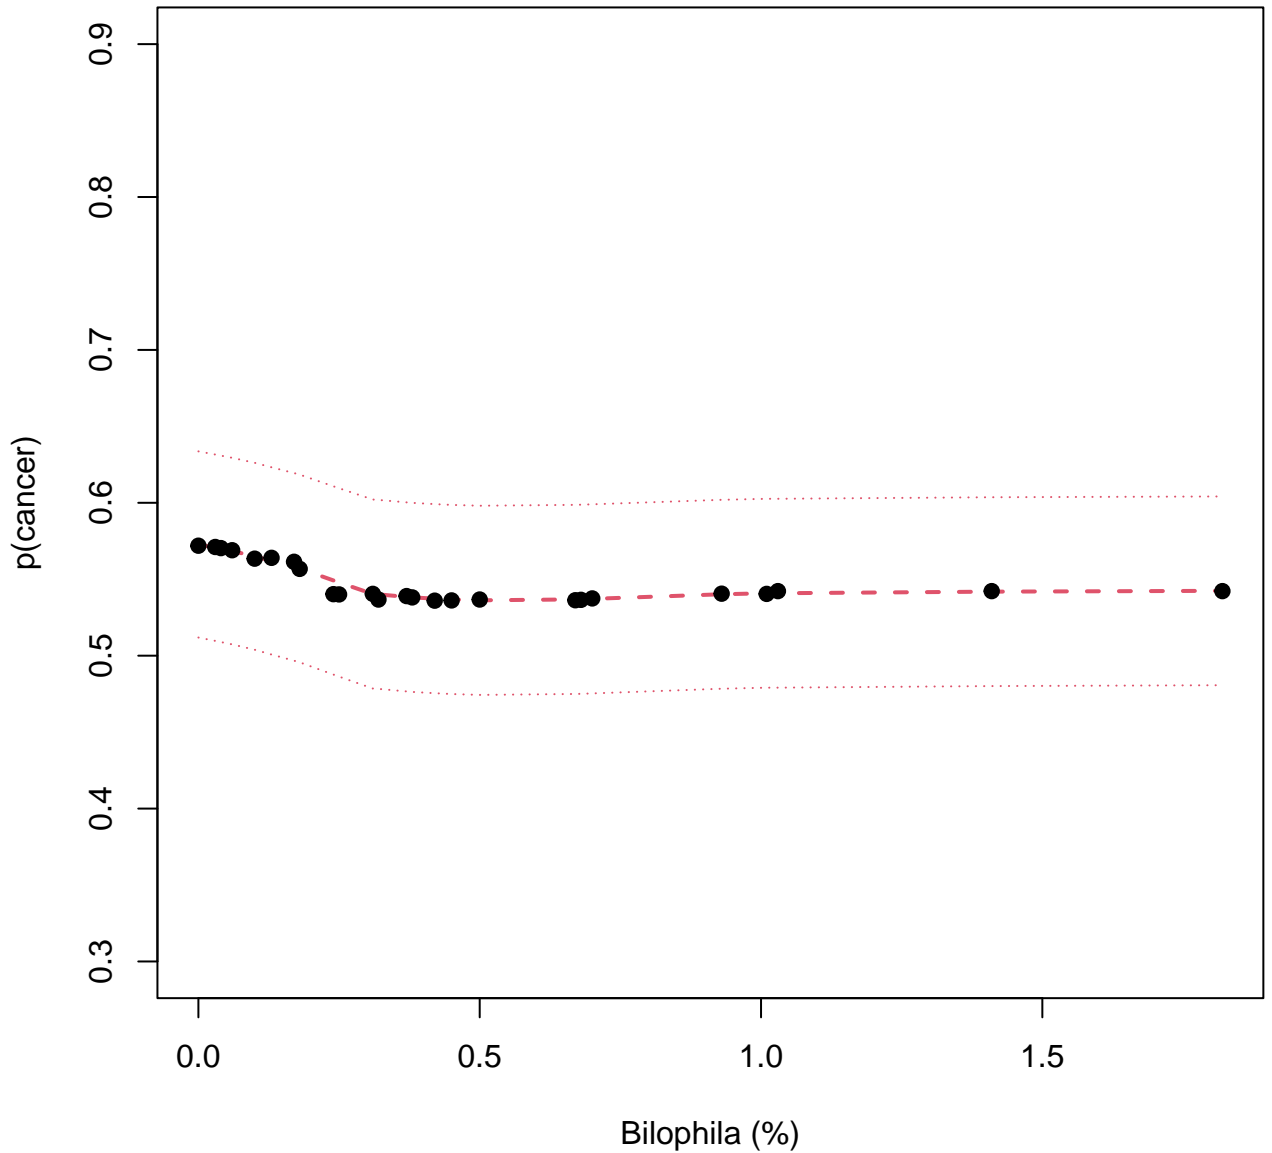

# Cancer vs ANHAC

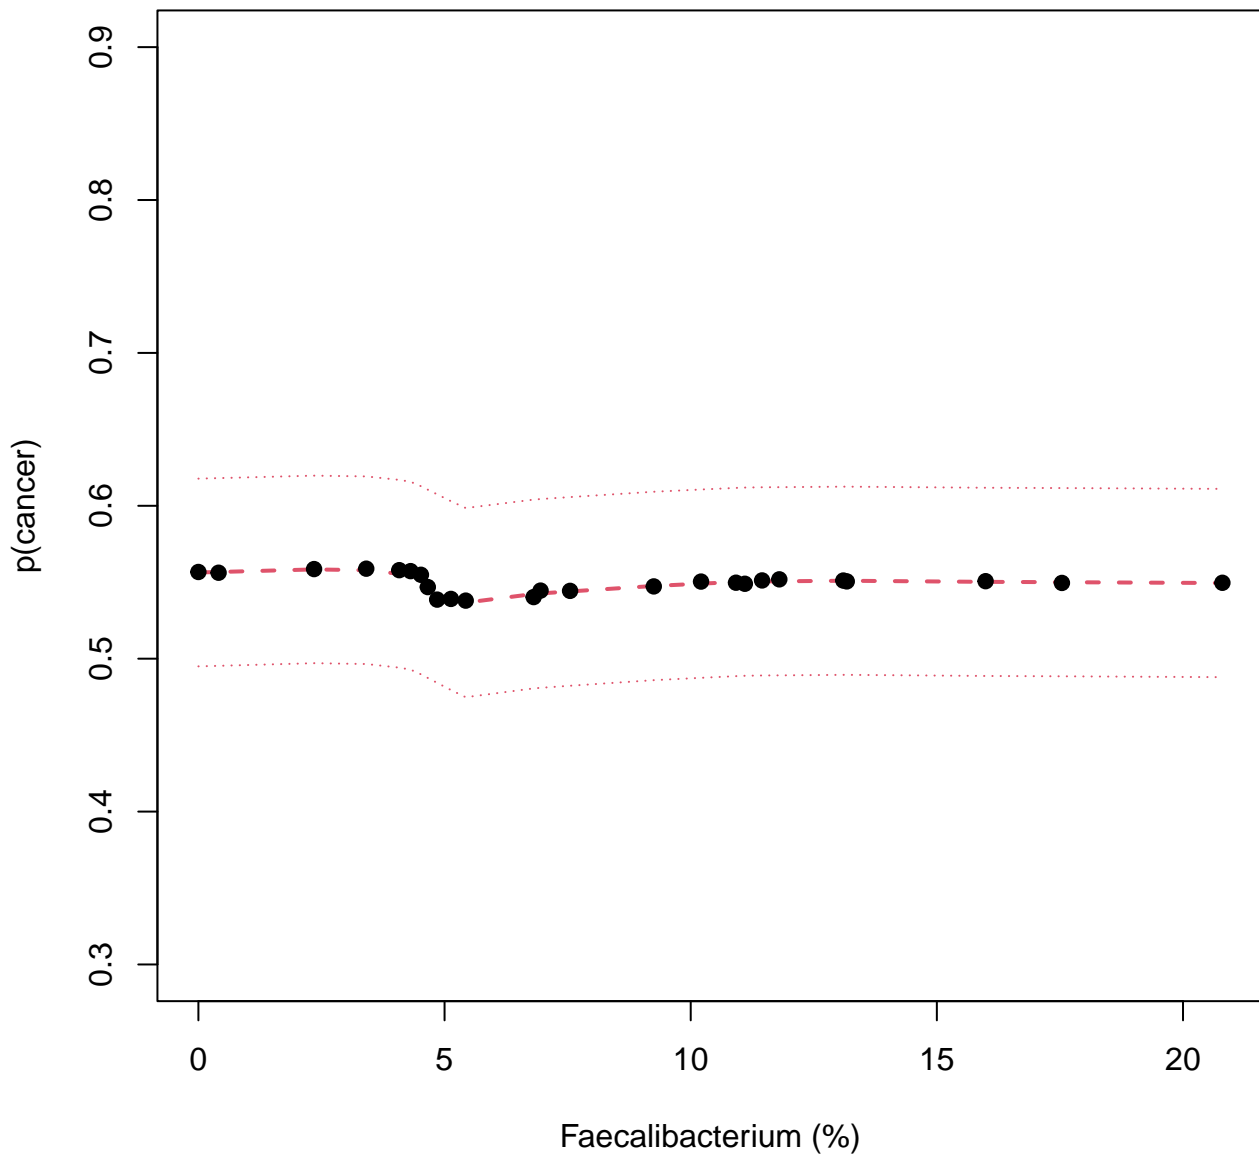

# Cancer vs ANHAC

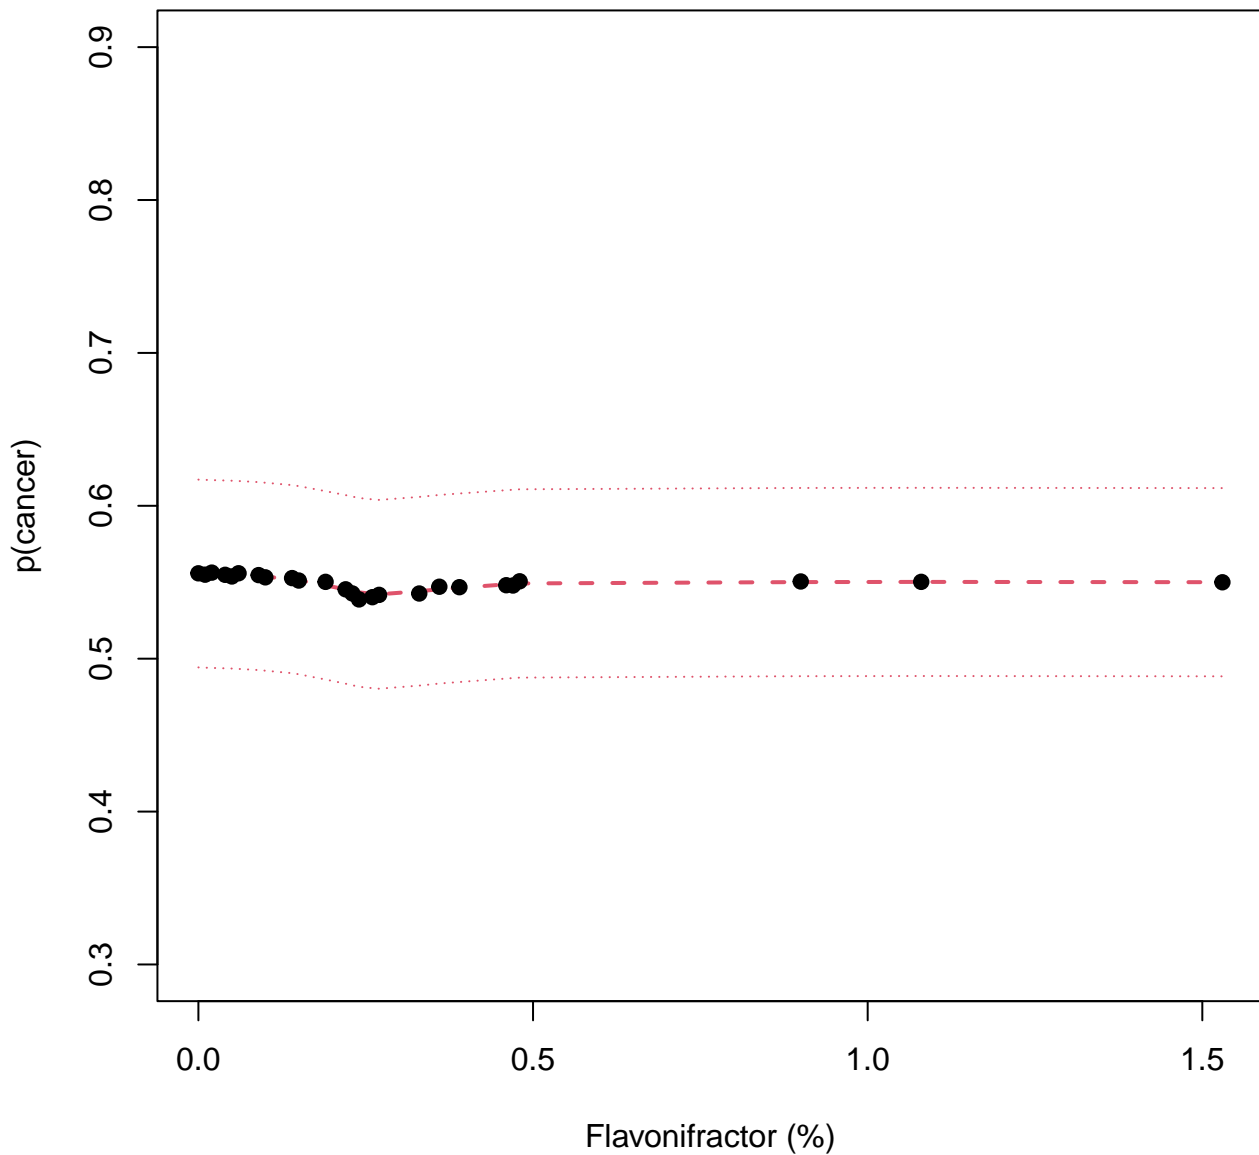

# Cancer vs ANHAC

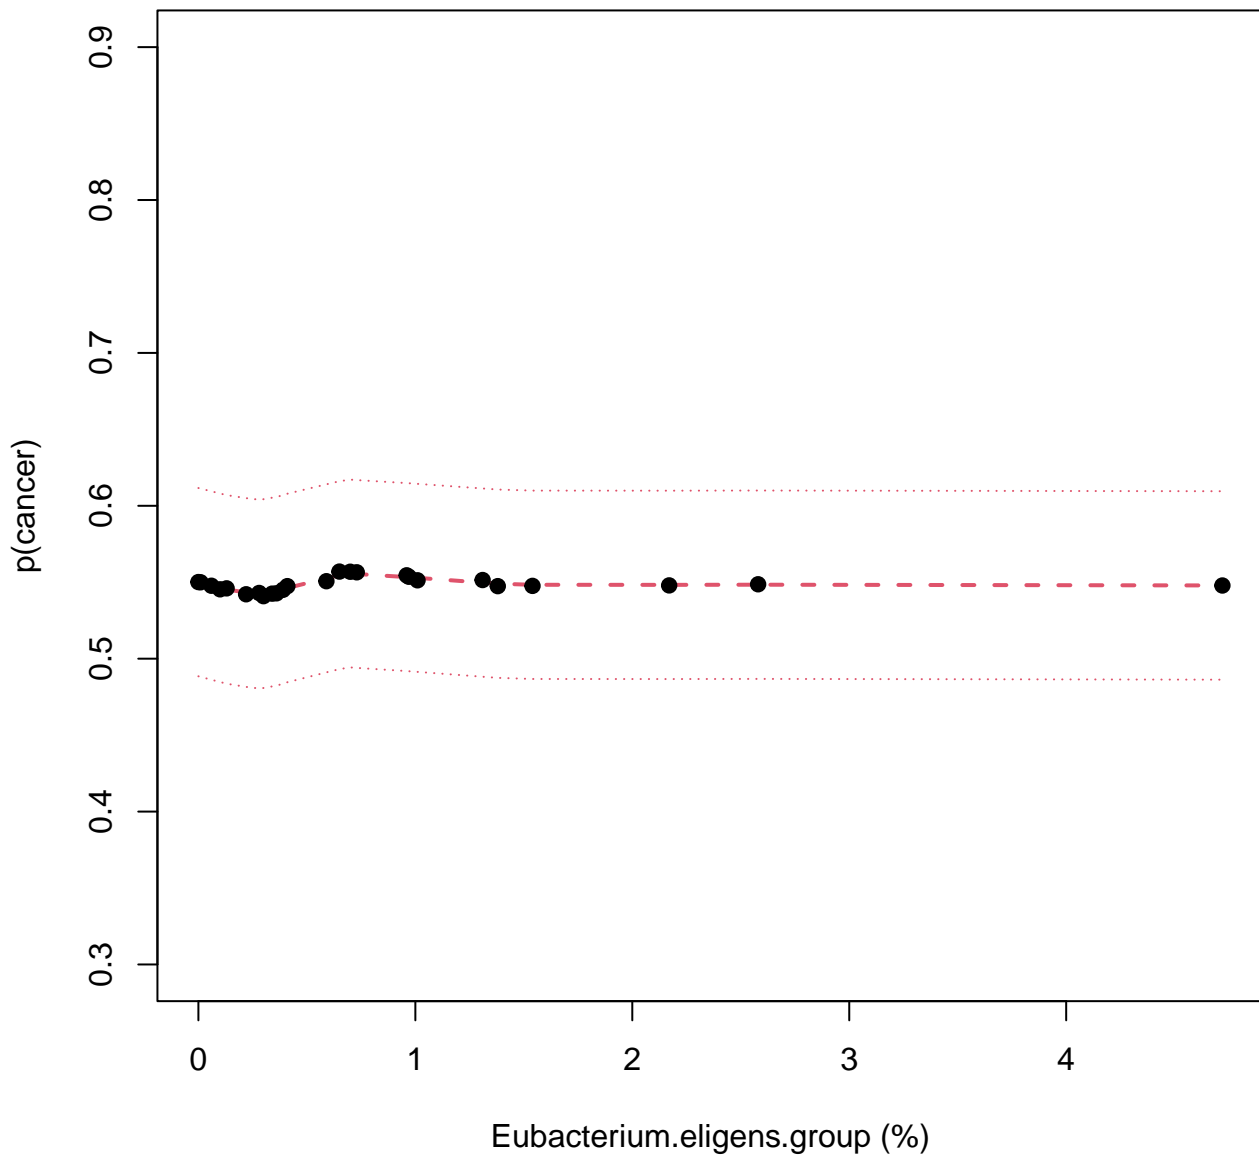



# Cancer vs ANHAC

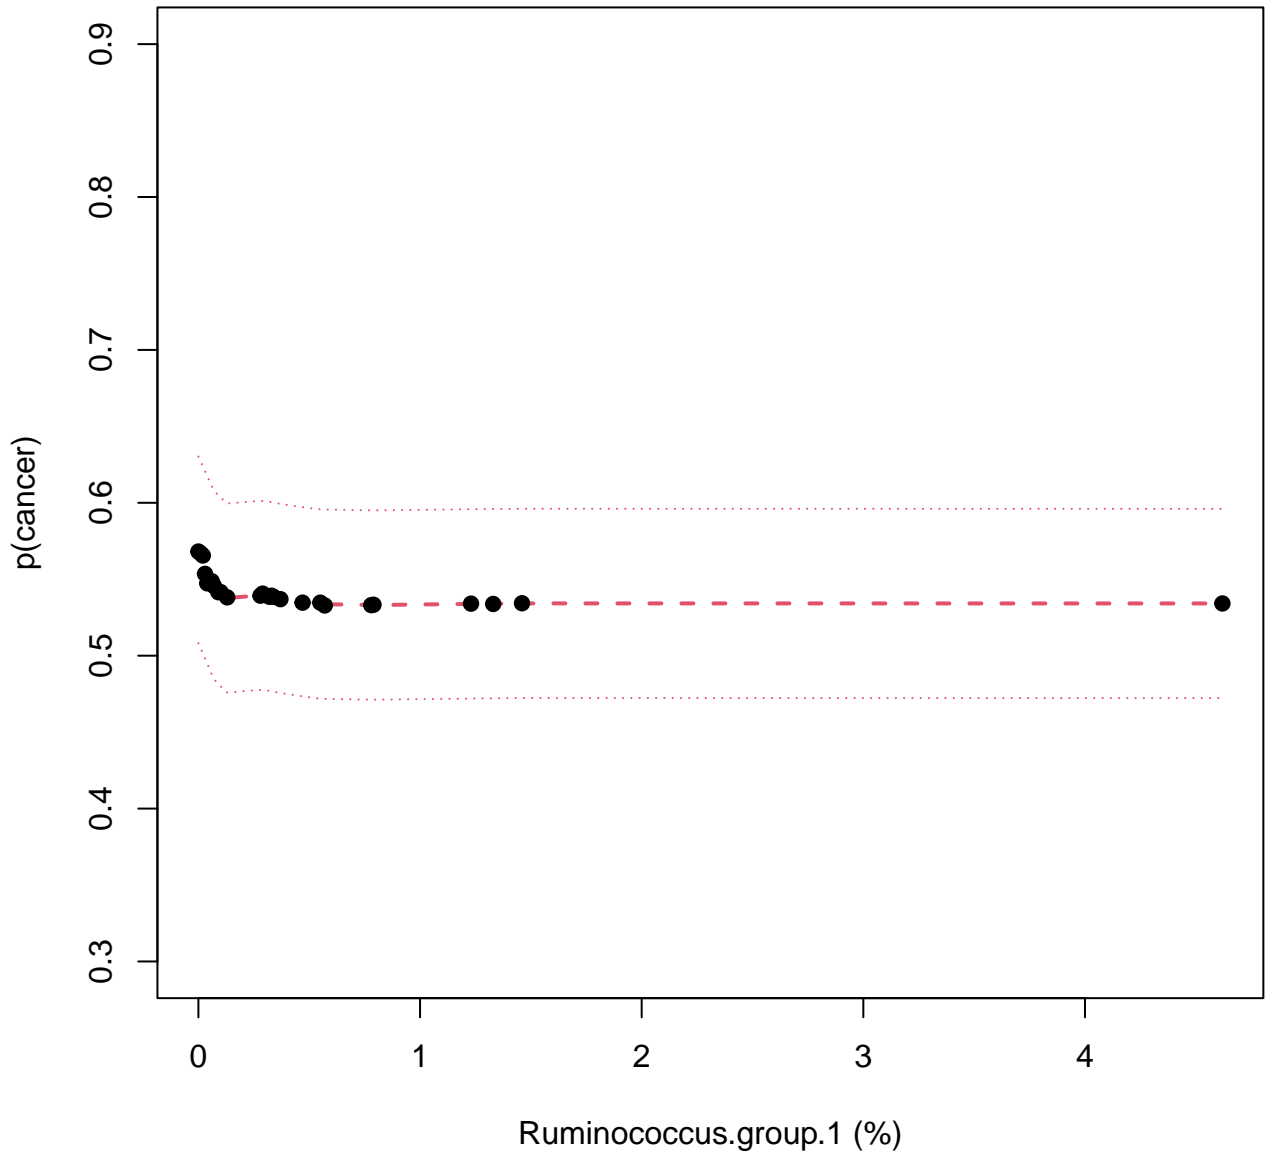

# Cancer vs ANHAC

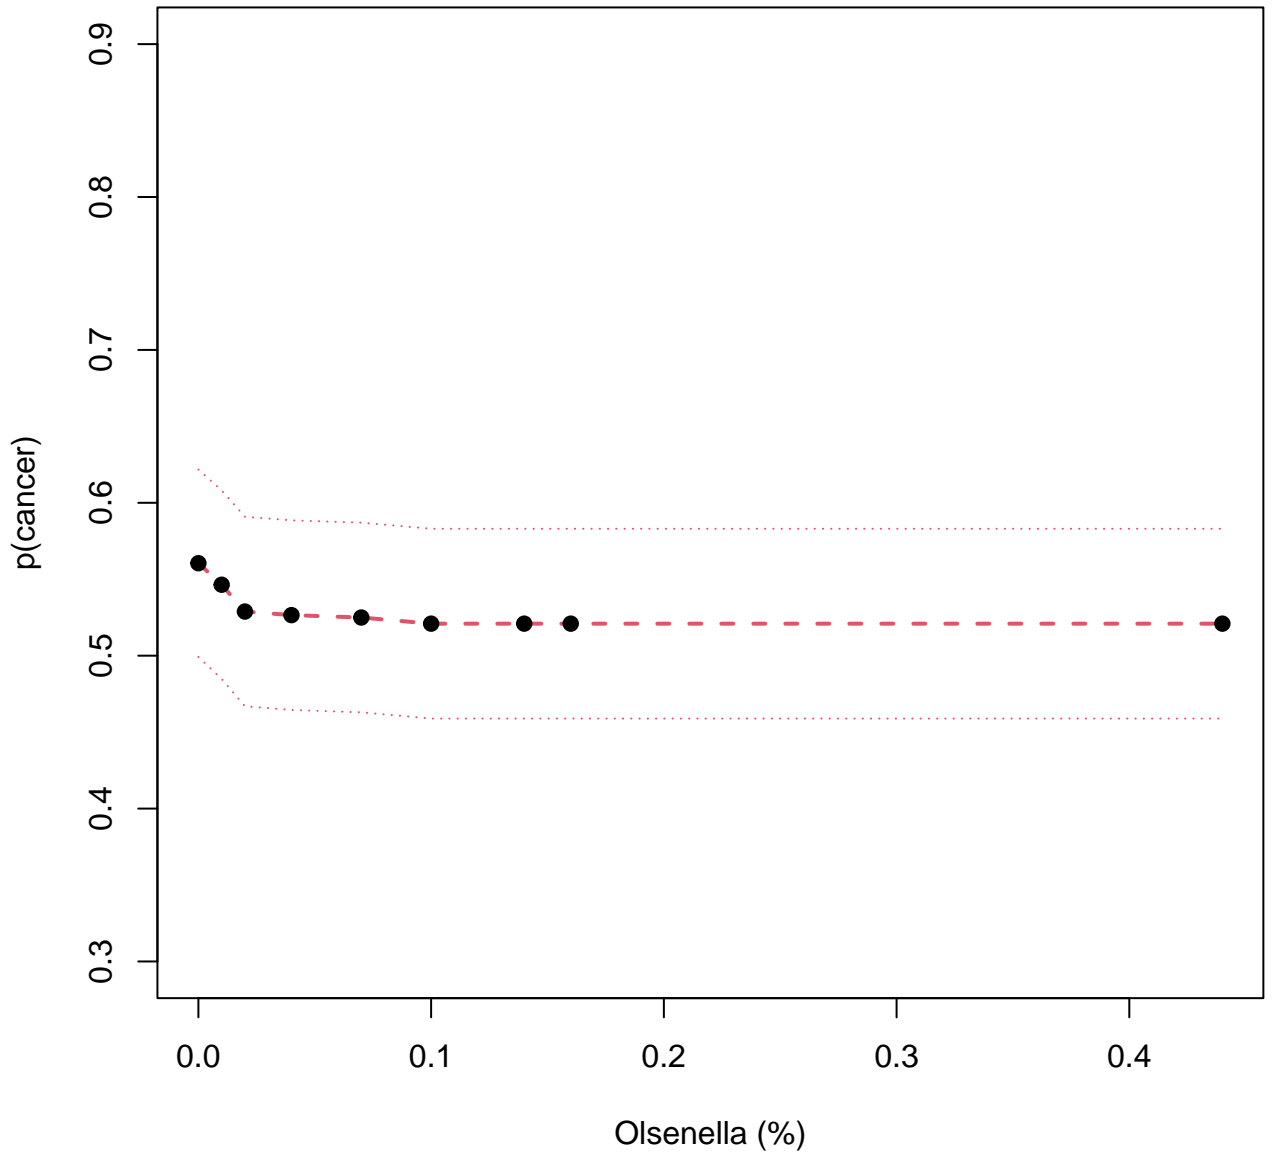

# Cancer vs ANHAC

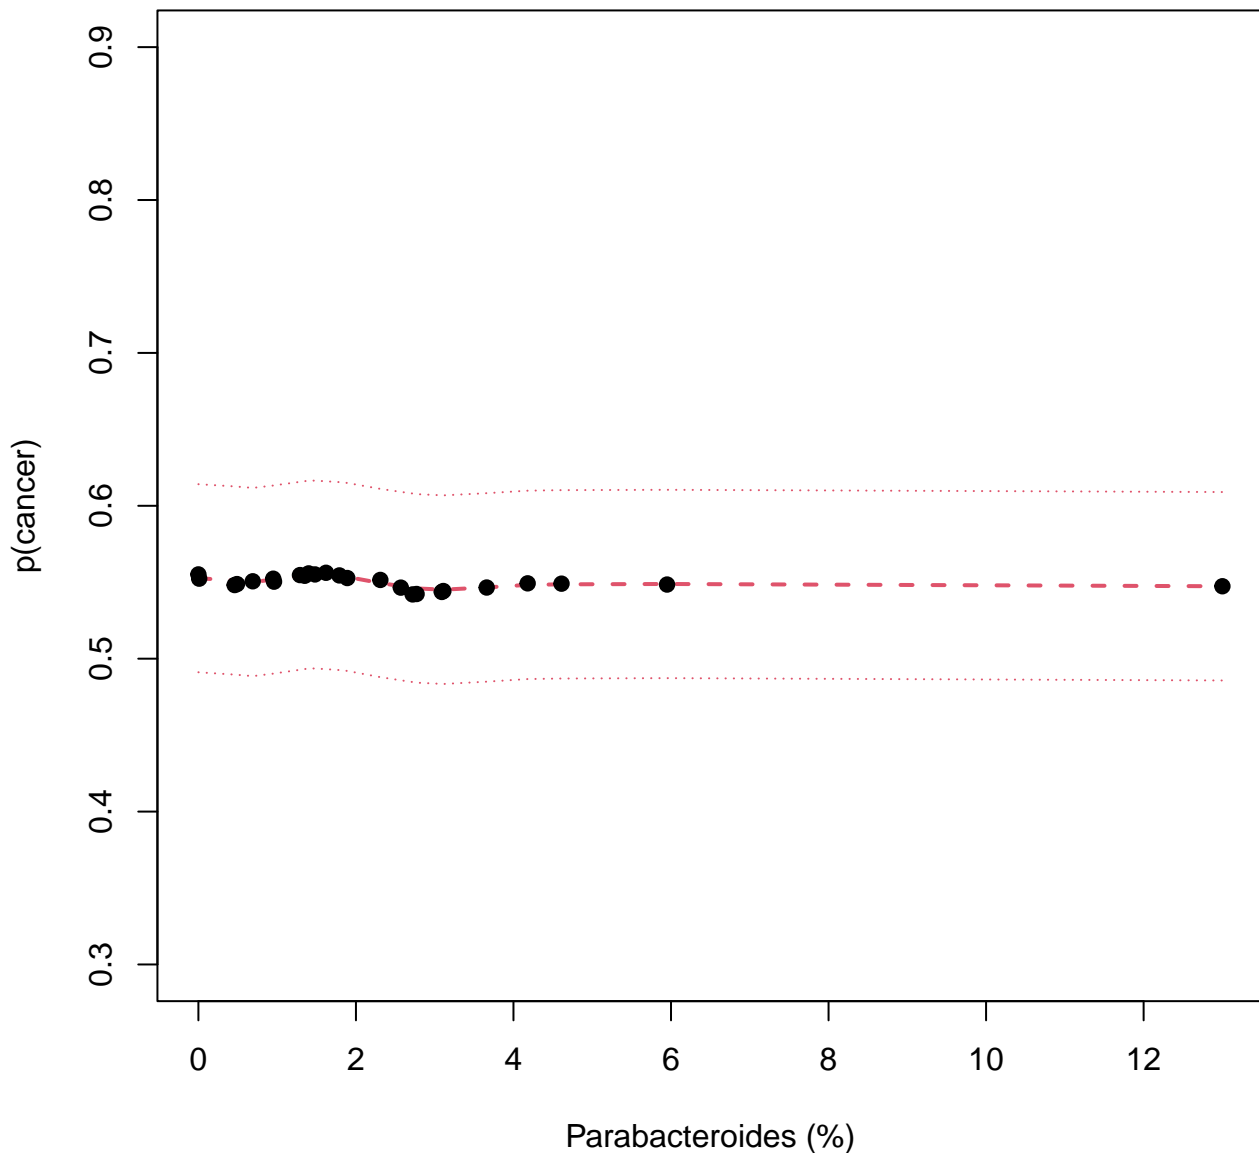

# Cancer vs ANHAC

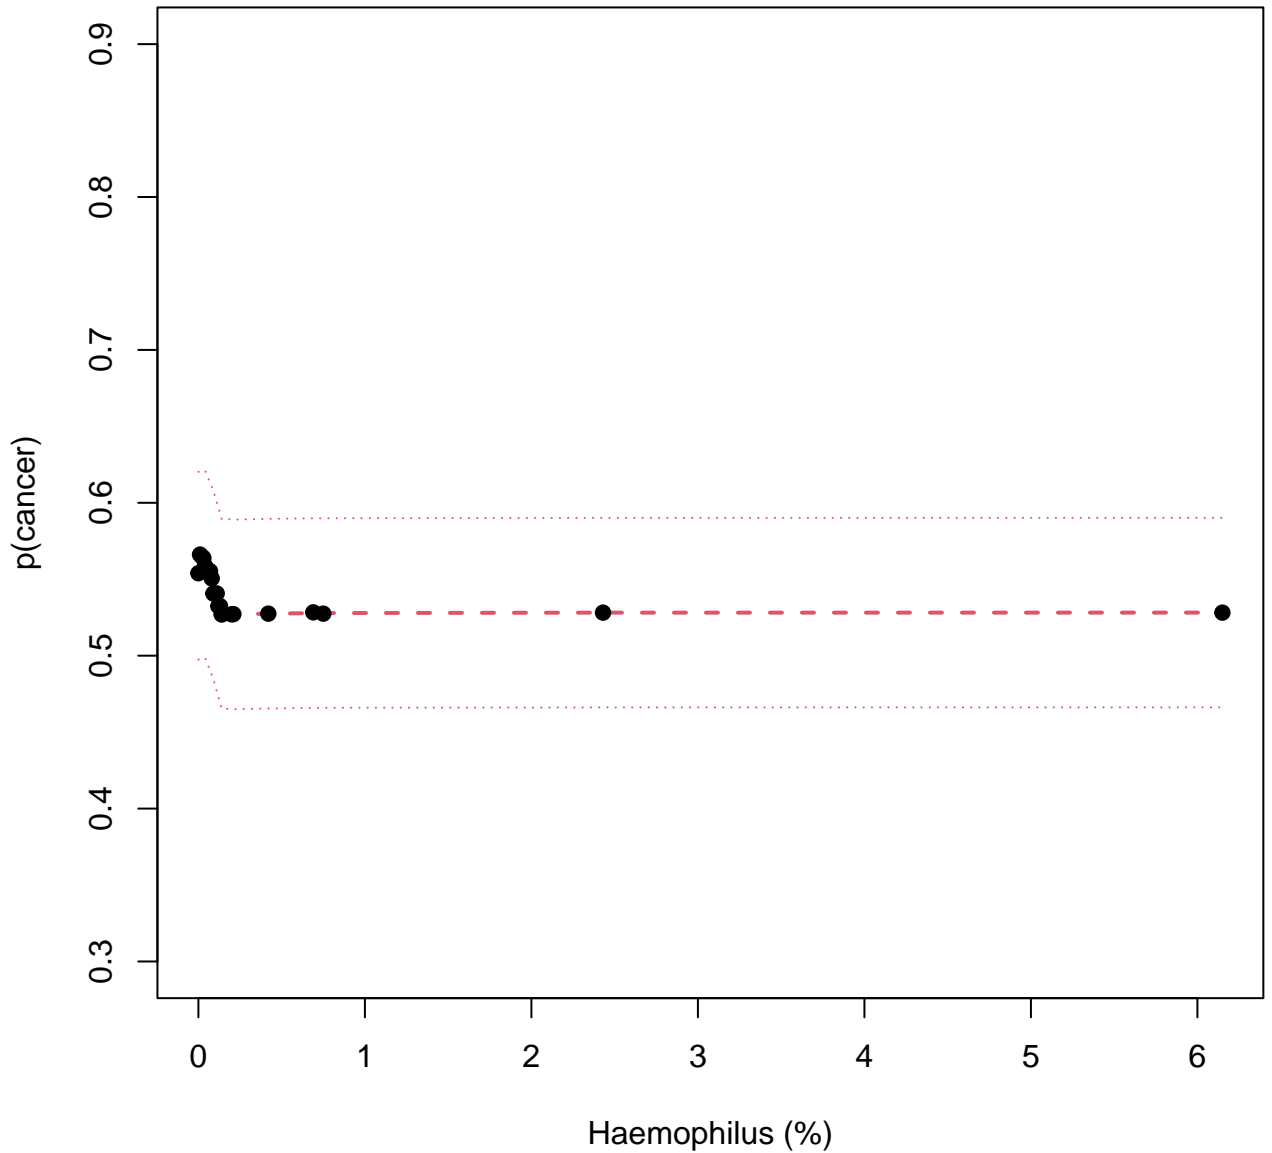

# Cancer vs ANHAC

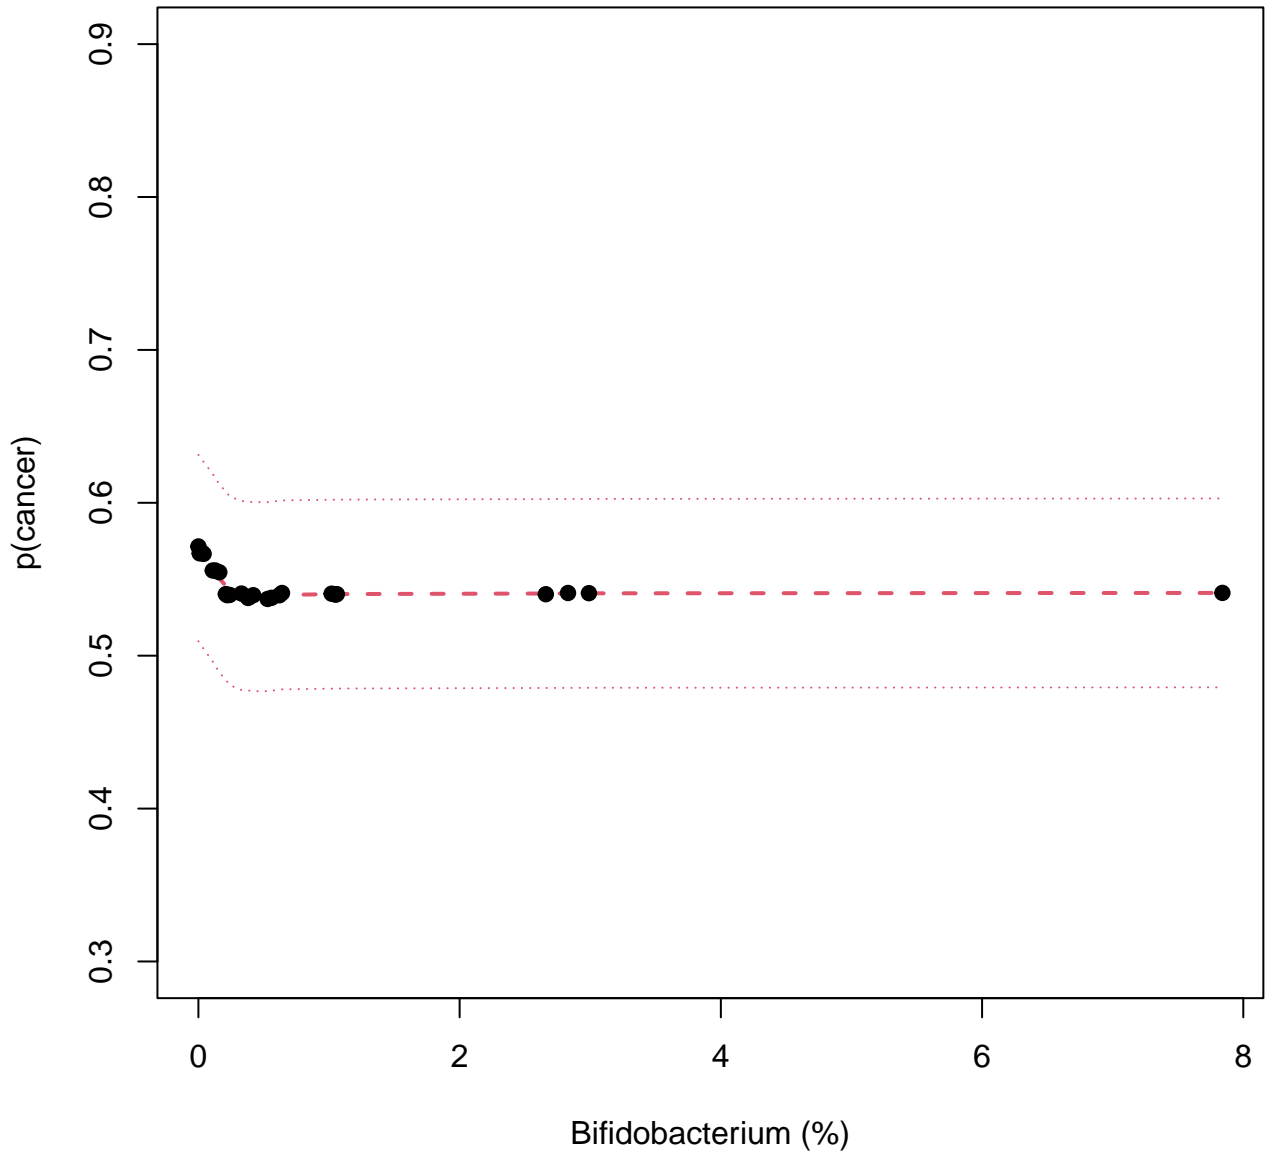

# Cancer vs ANHAC

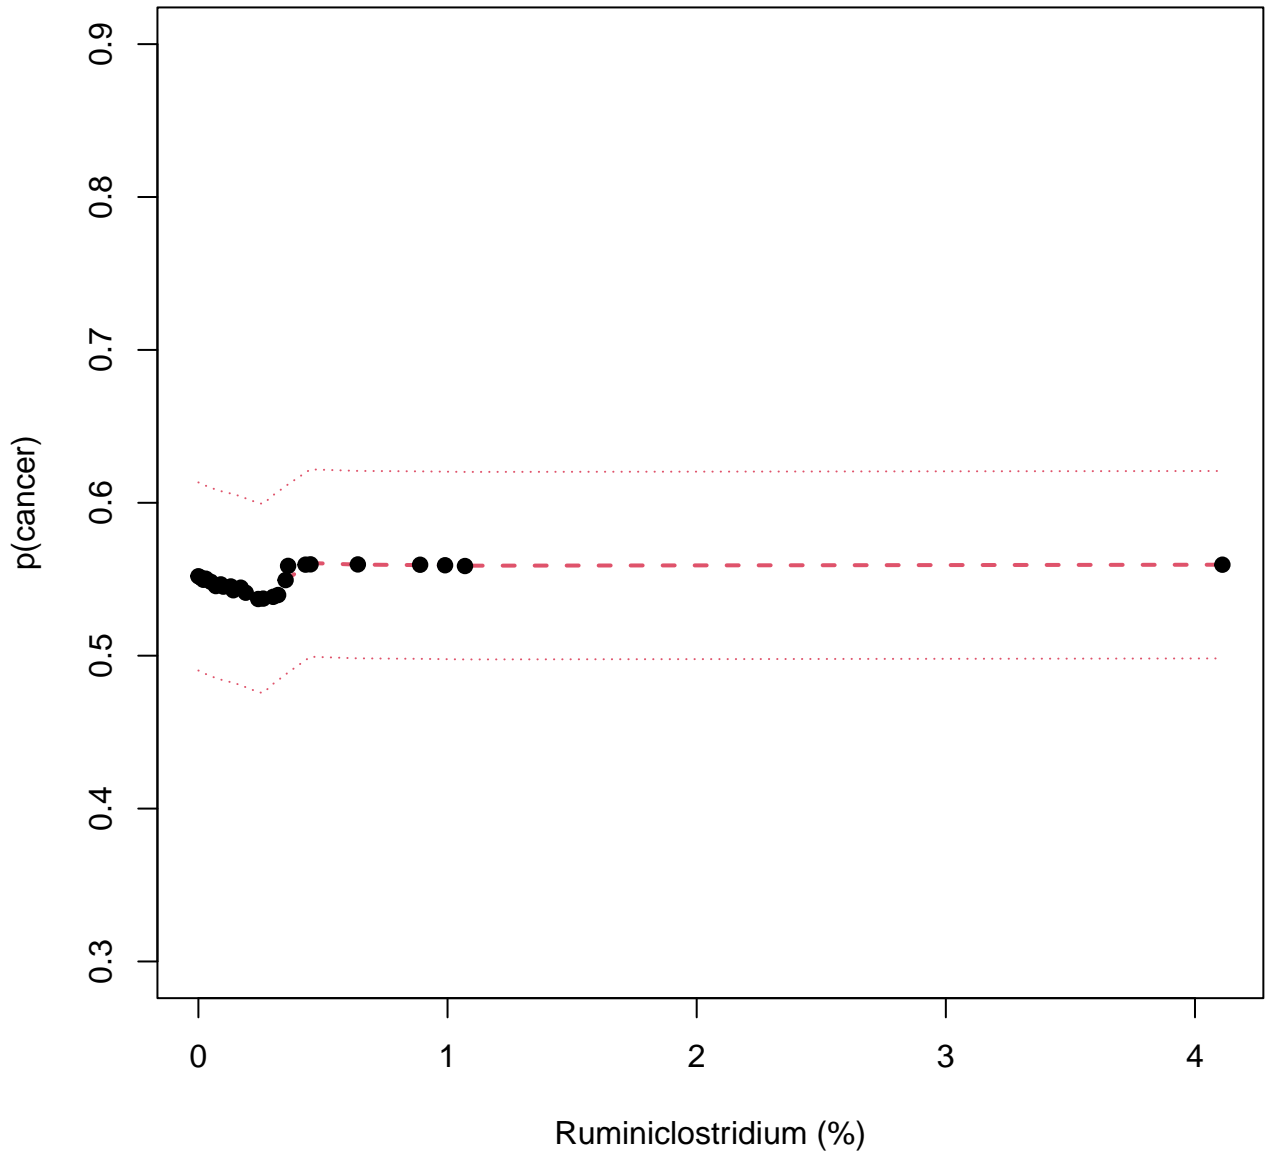

# Cancer vs ANHAC

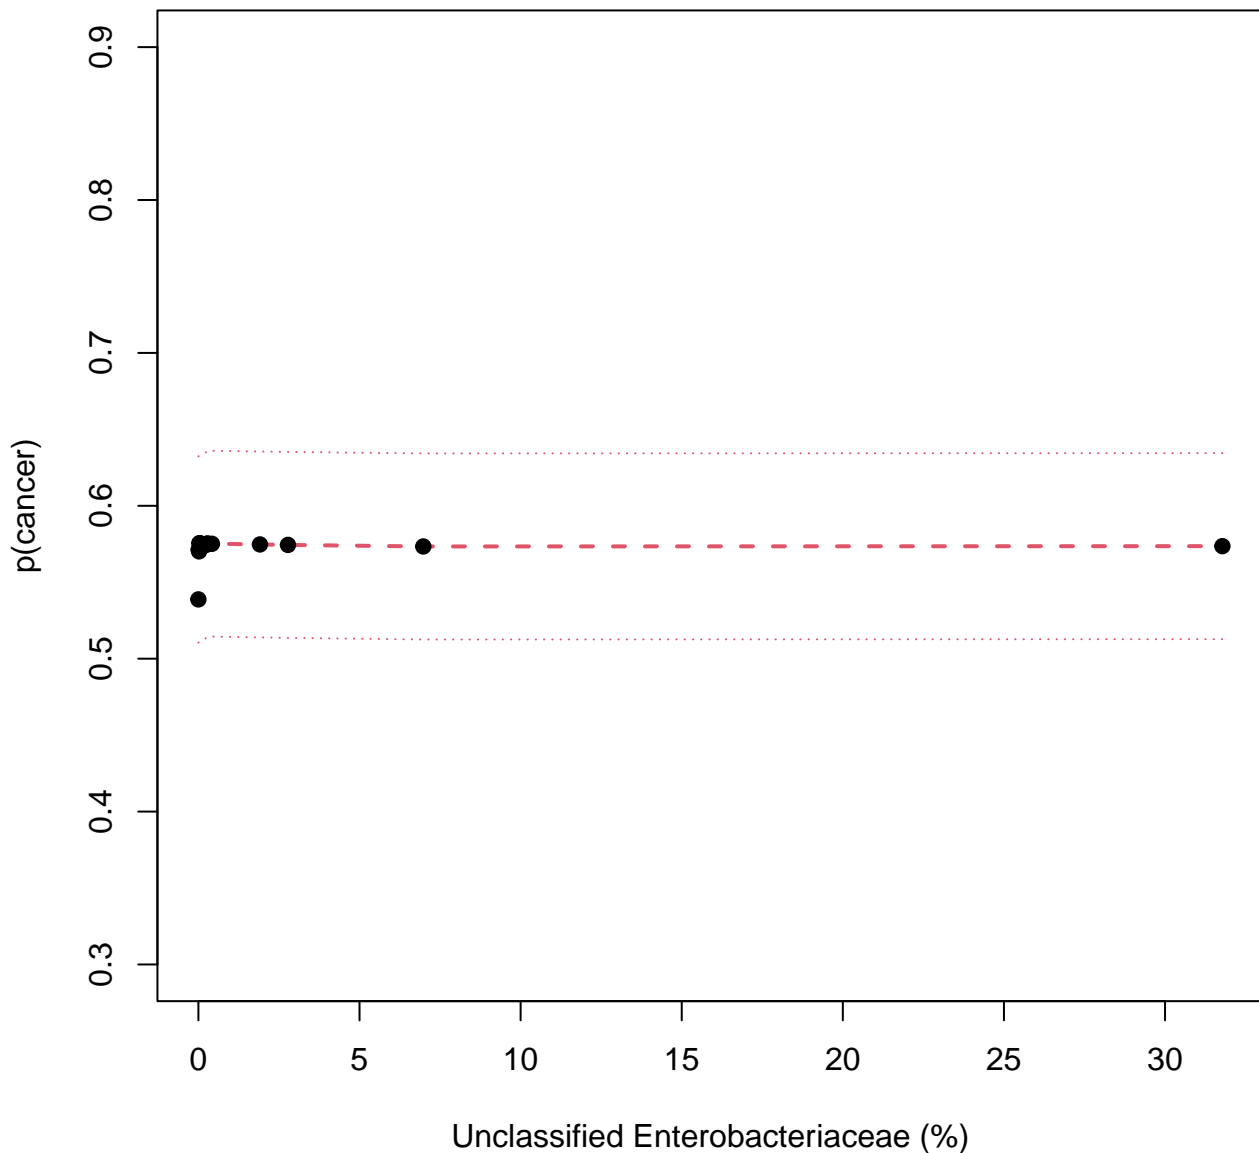

# Cancer vs ANHAC

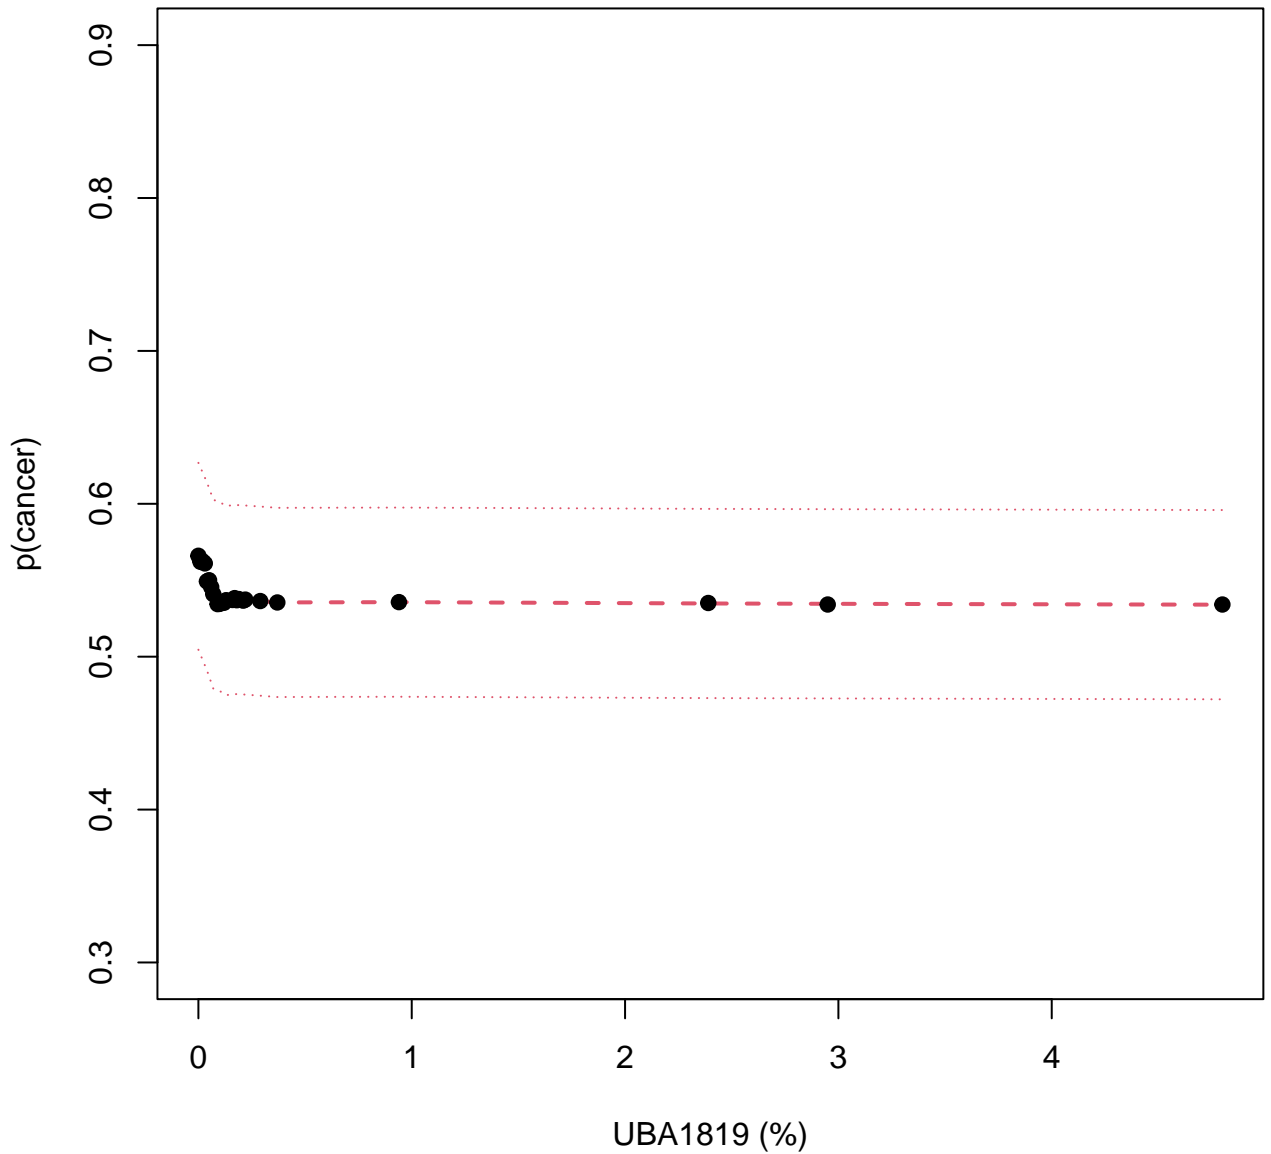



# Cancer vs ANHAC

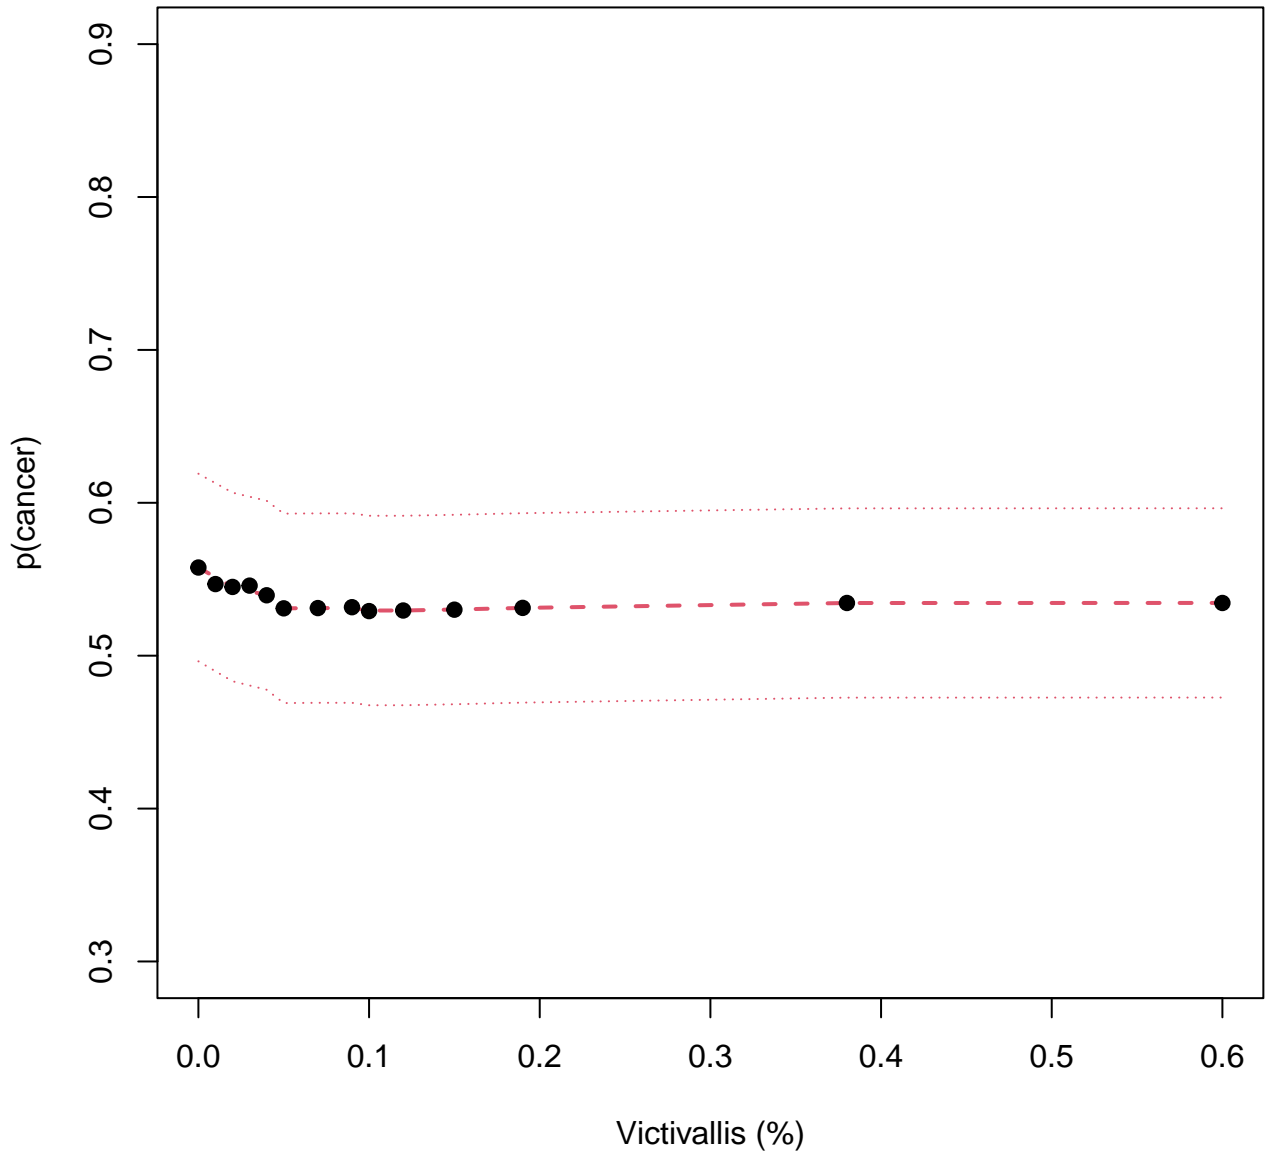

# Cancer vs ANHAC

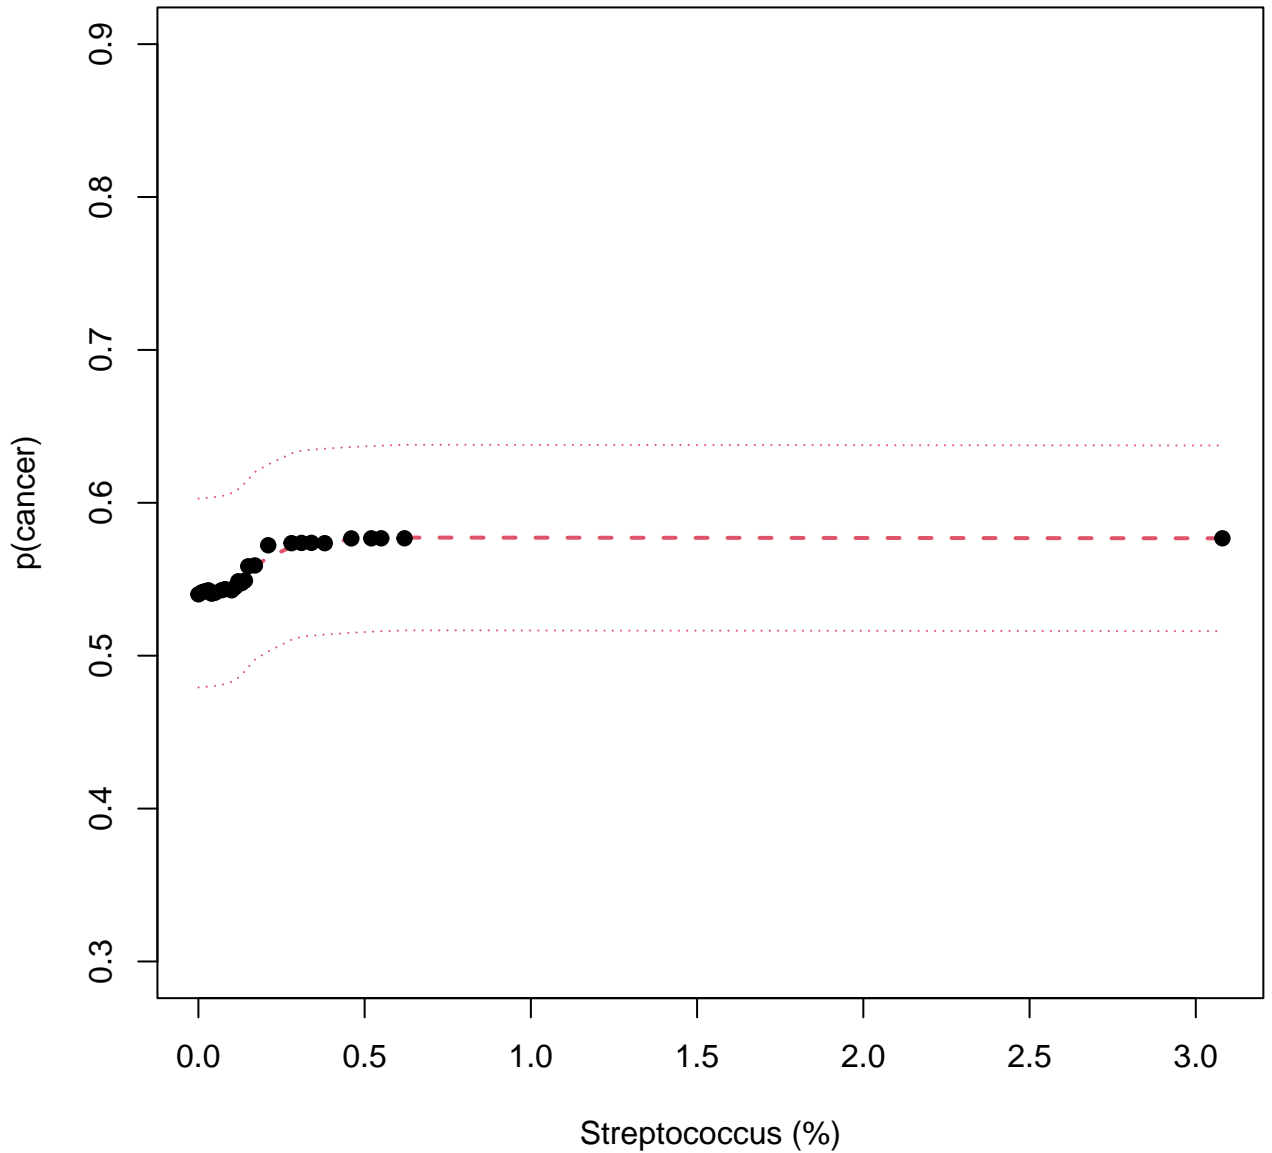

# Cancer vs ANHAC

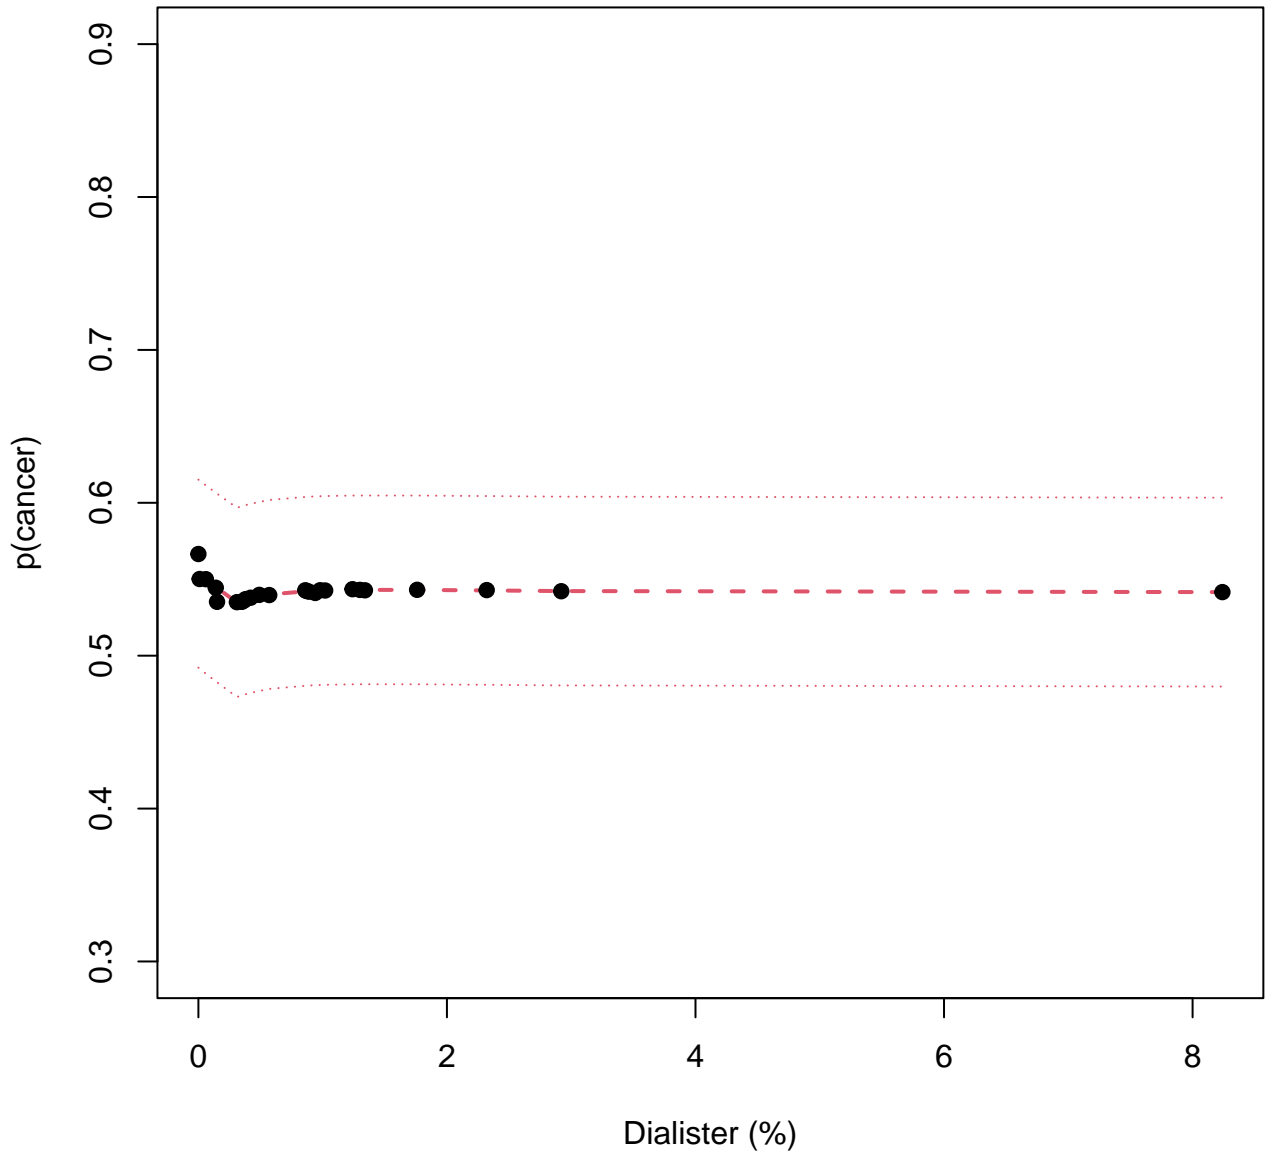

# Cancer vs ANHAC

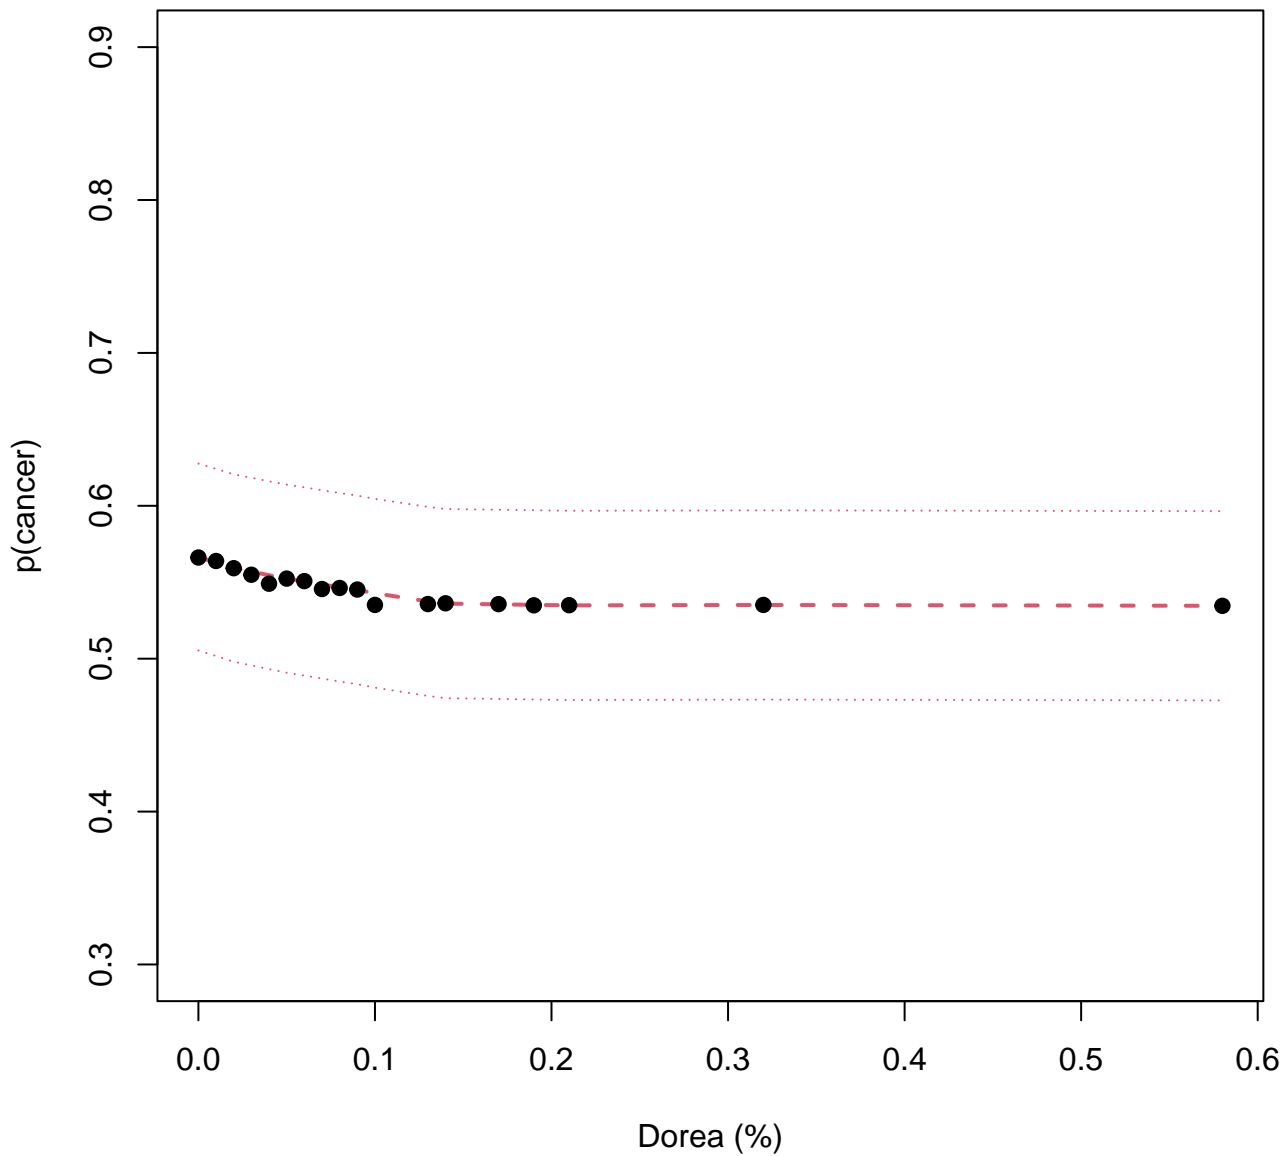

# Cancer vs ANHAC

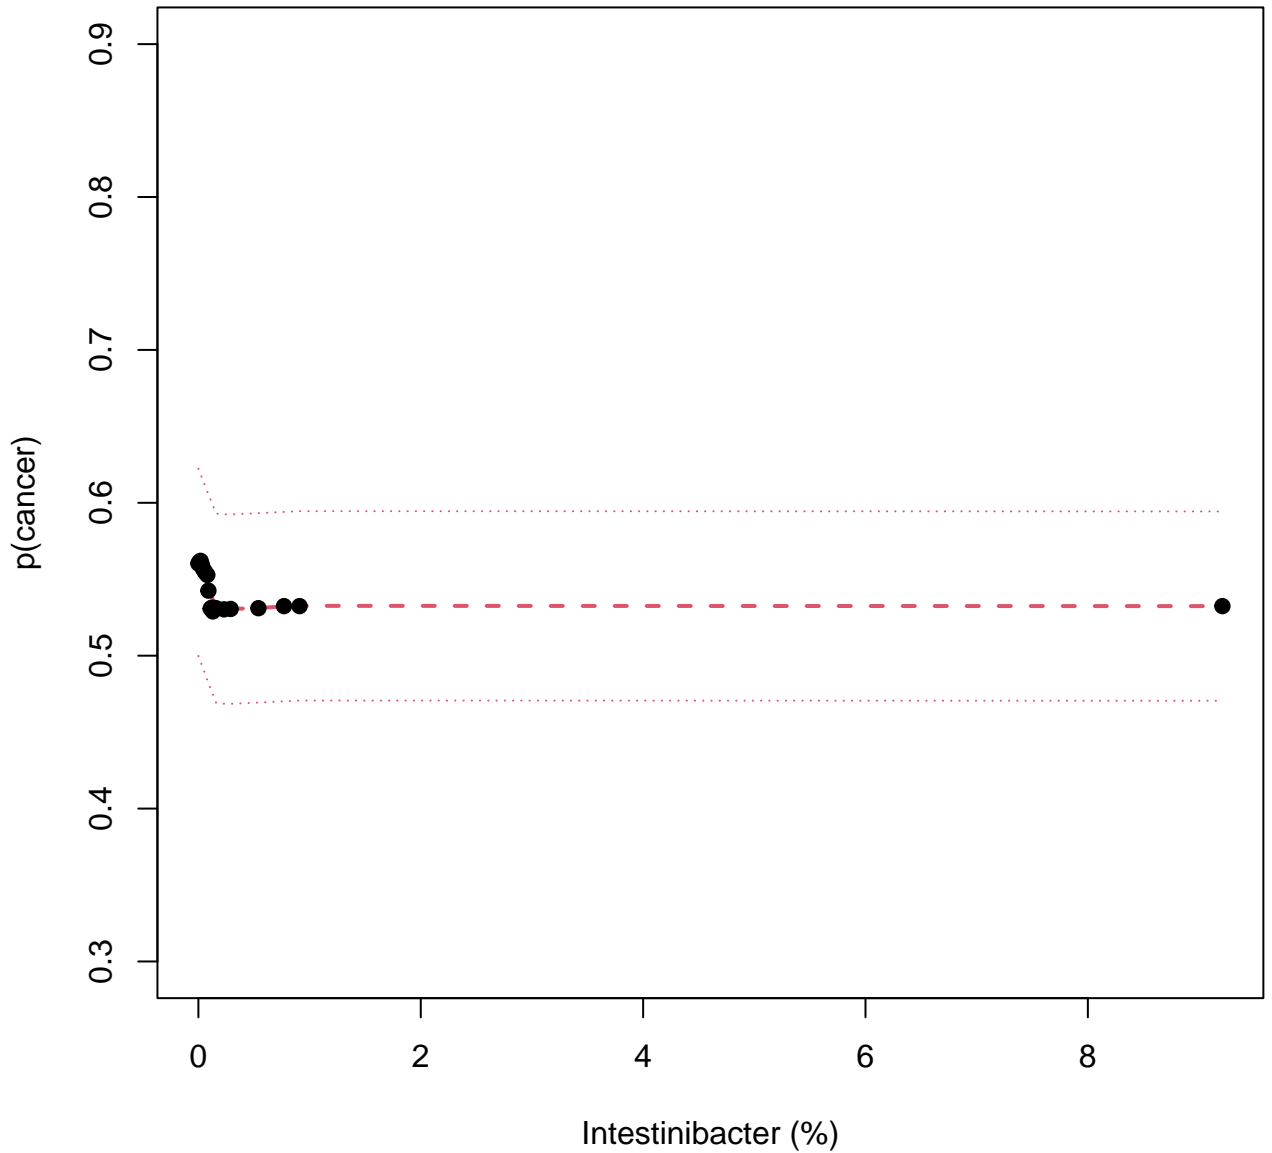

# Cancer vs ANHAC

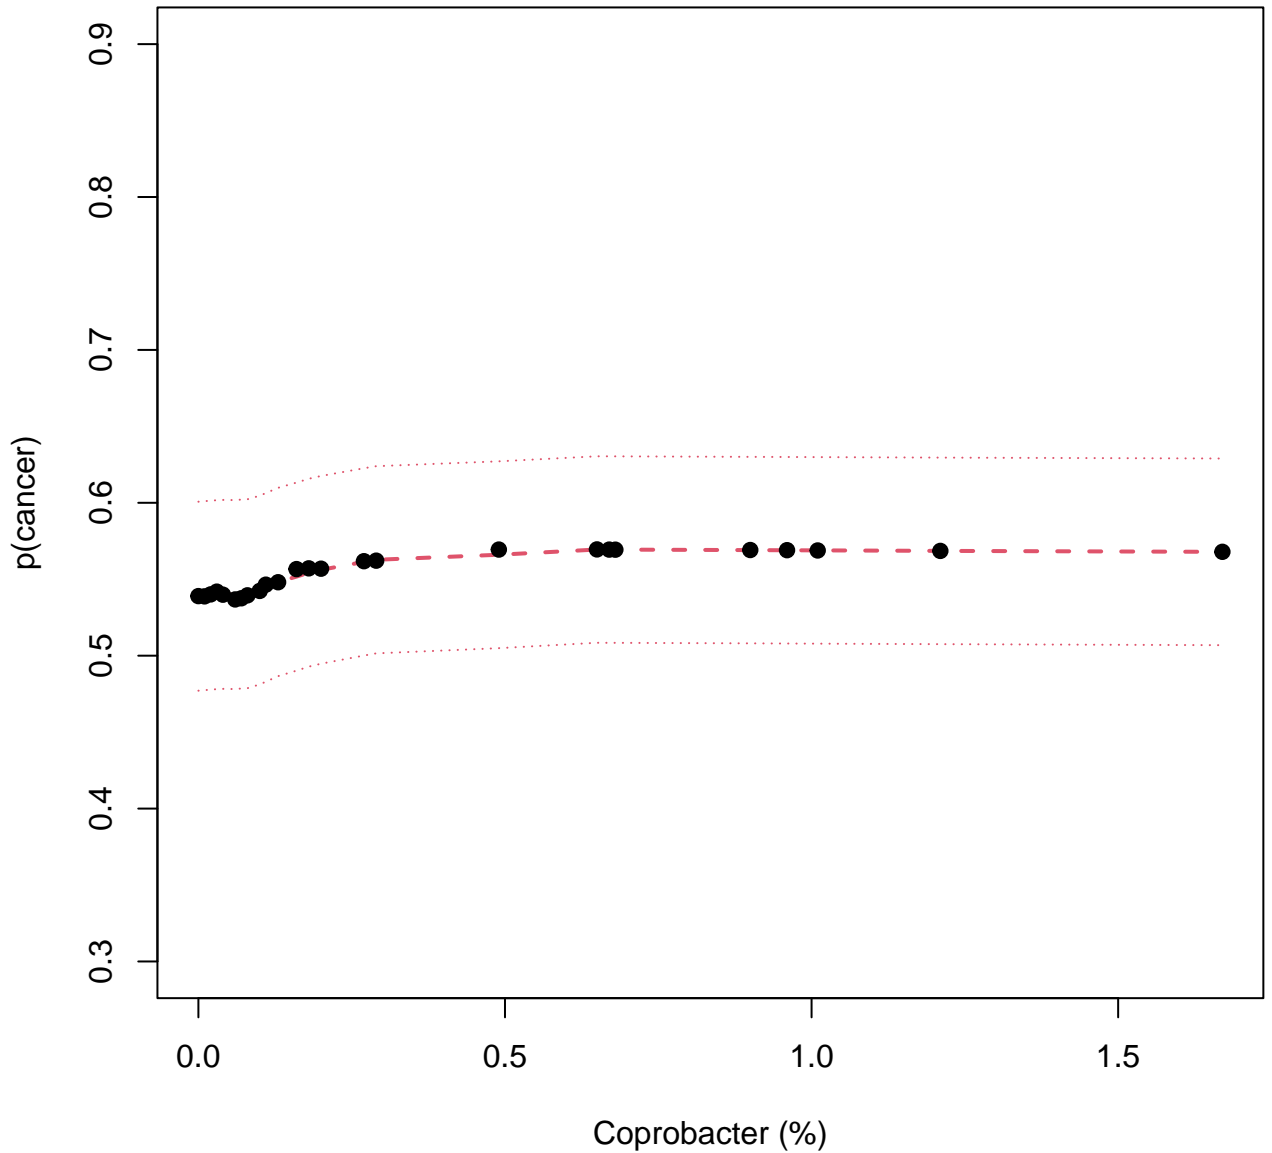

# Cancer vs ANHAC

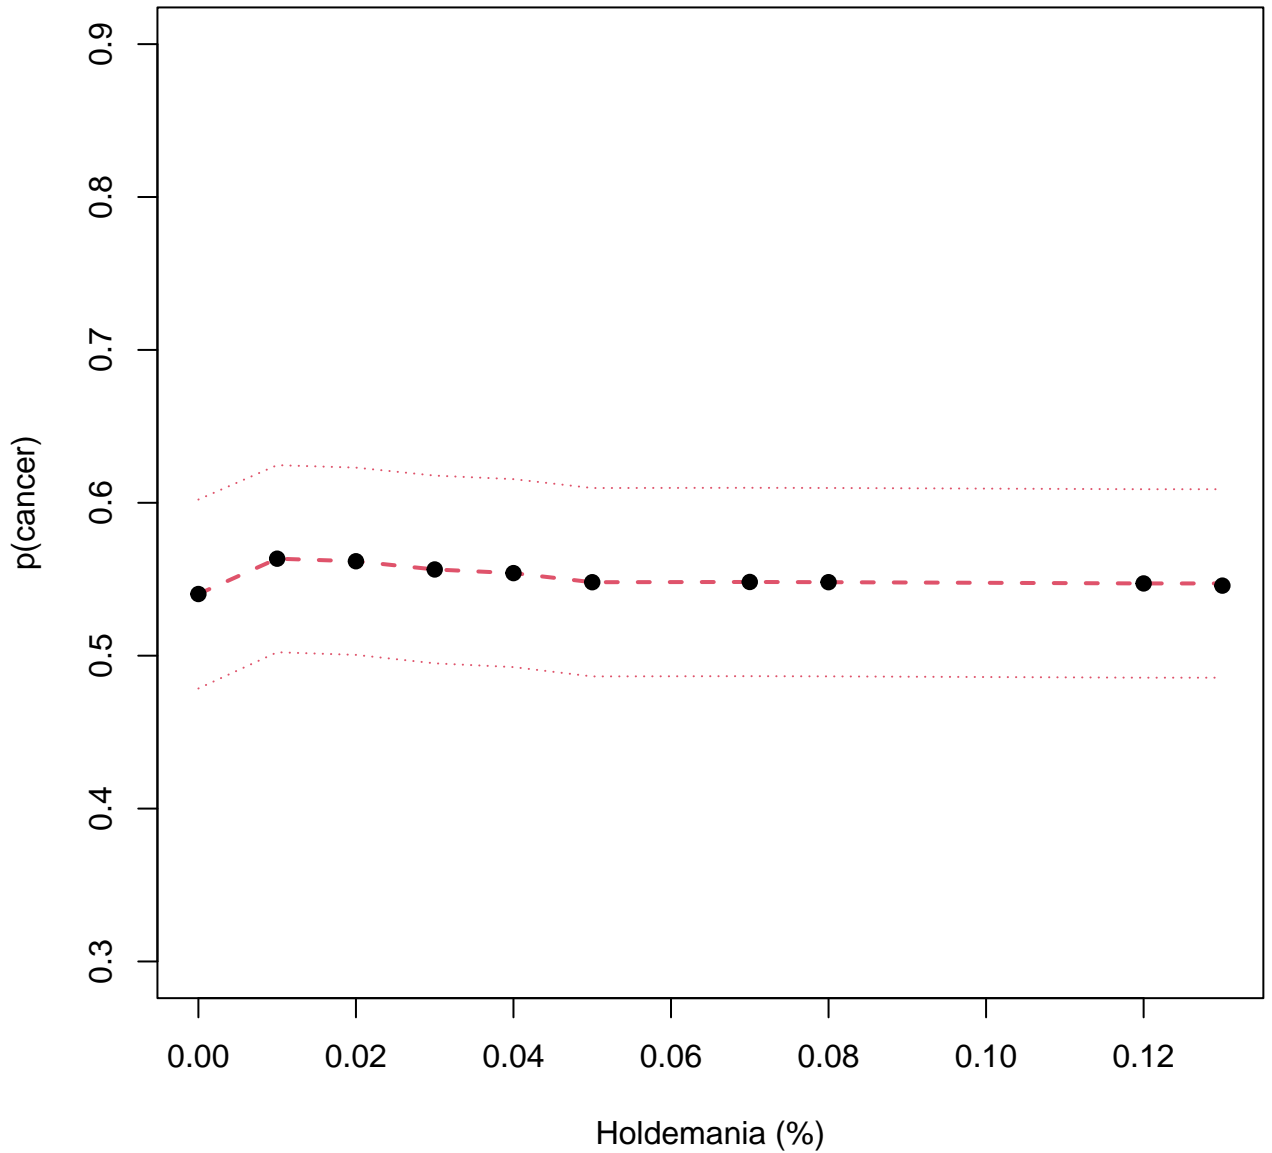

# Cancer vs ANHAC

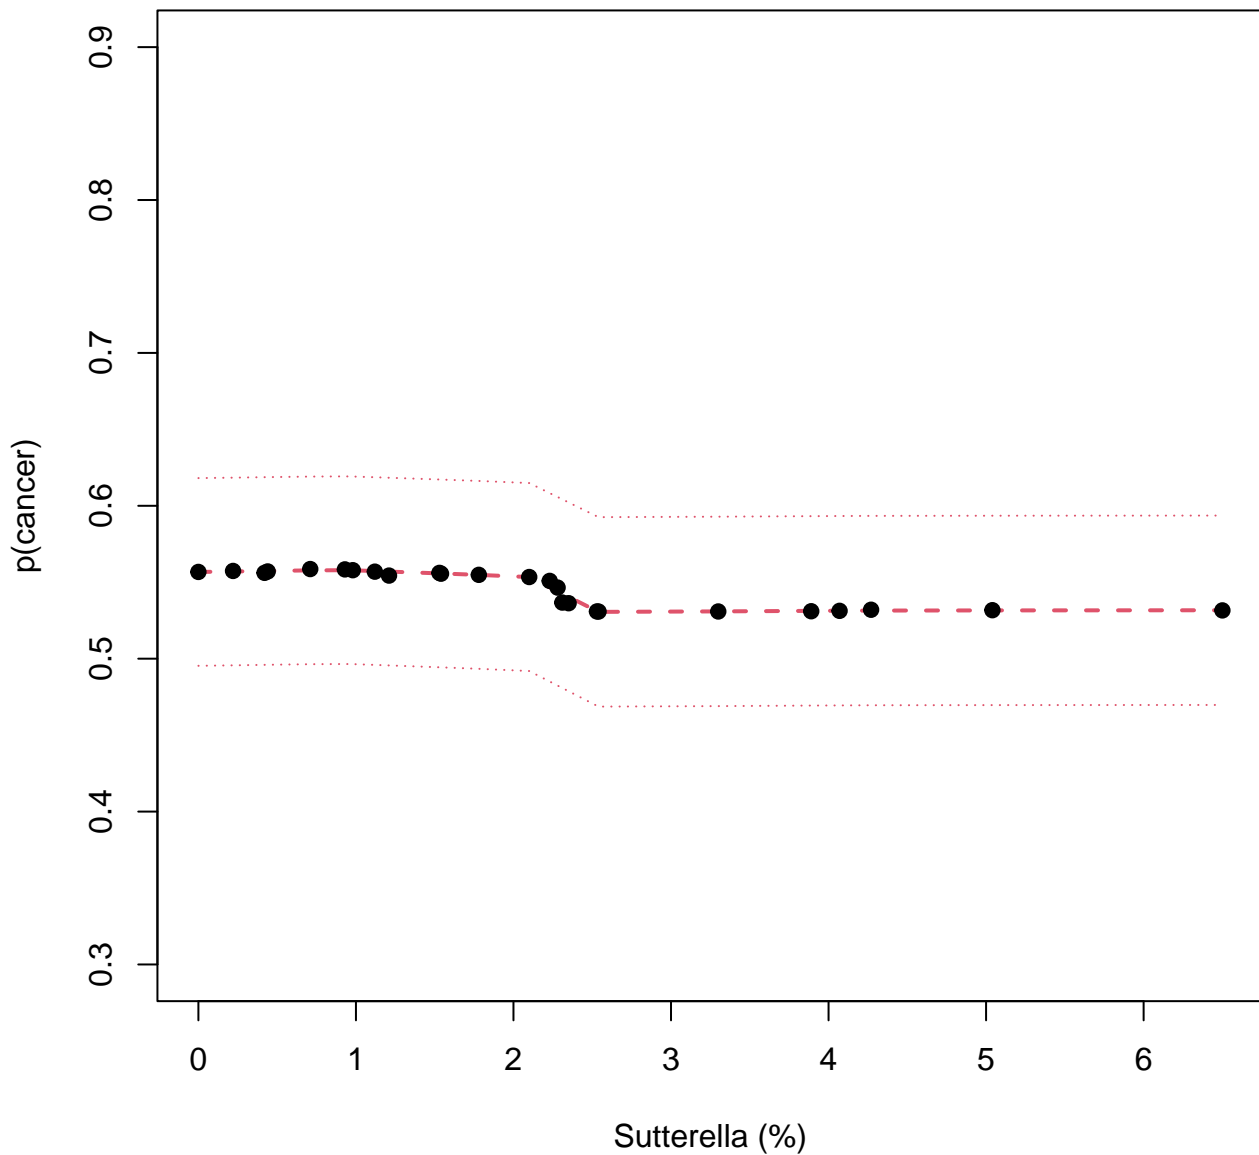



# Cancer vs ANHAC

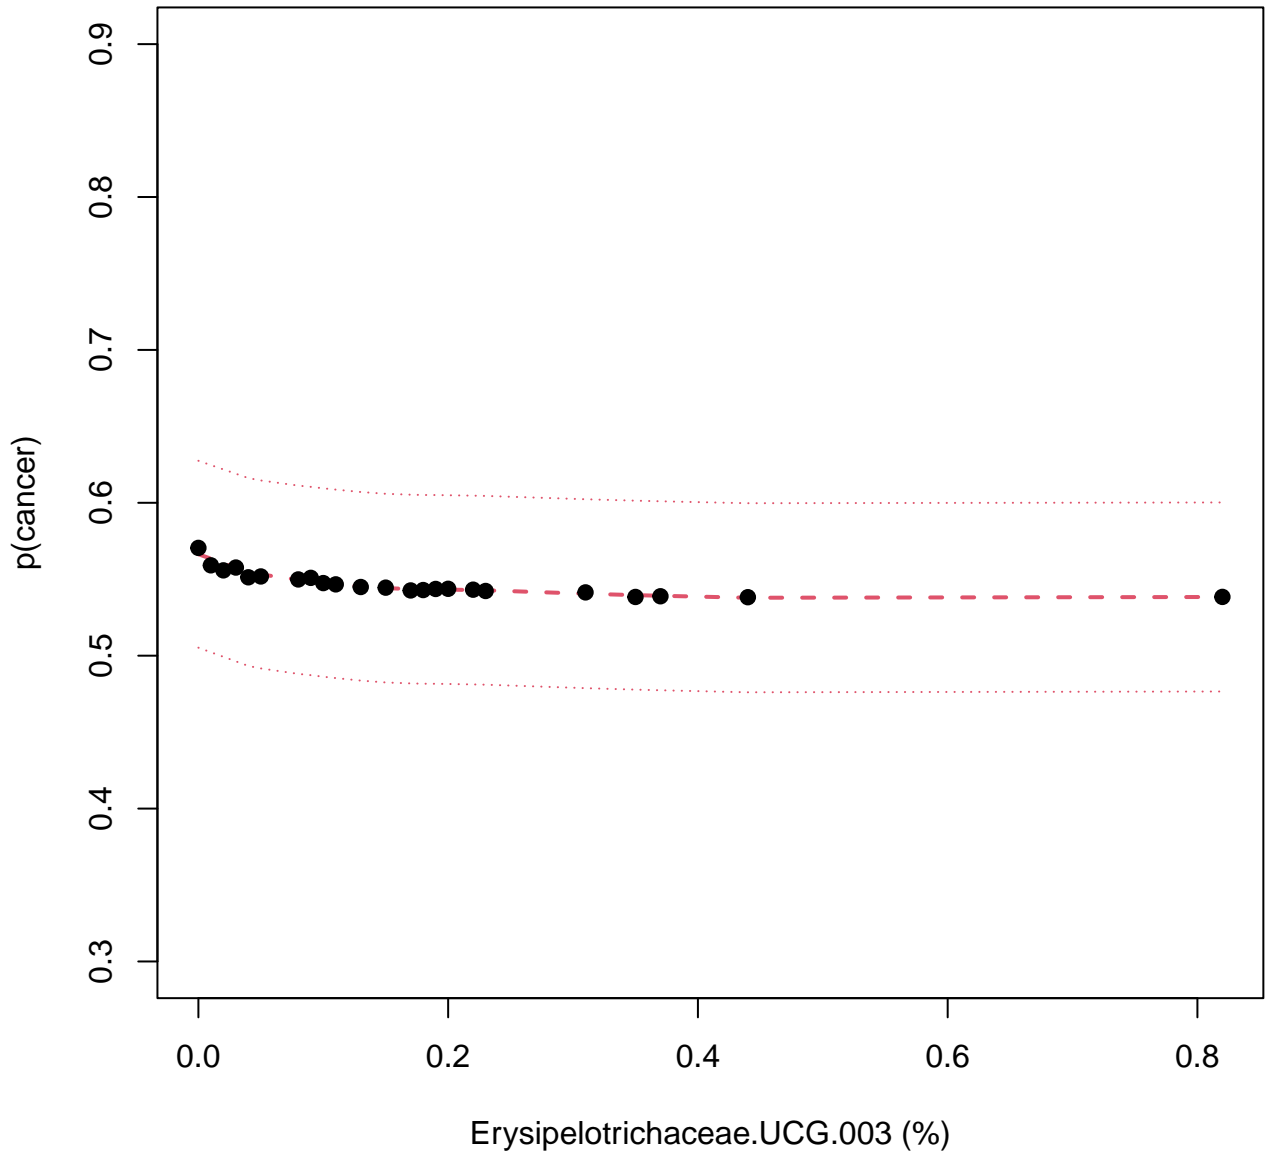

# Cancer vs ANHAC

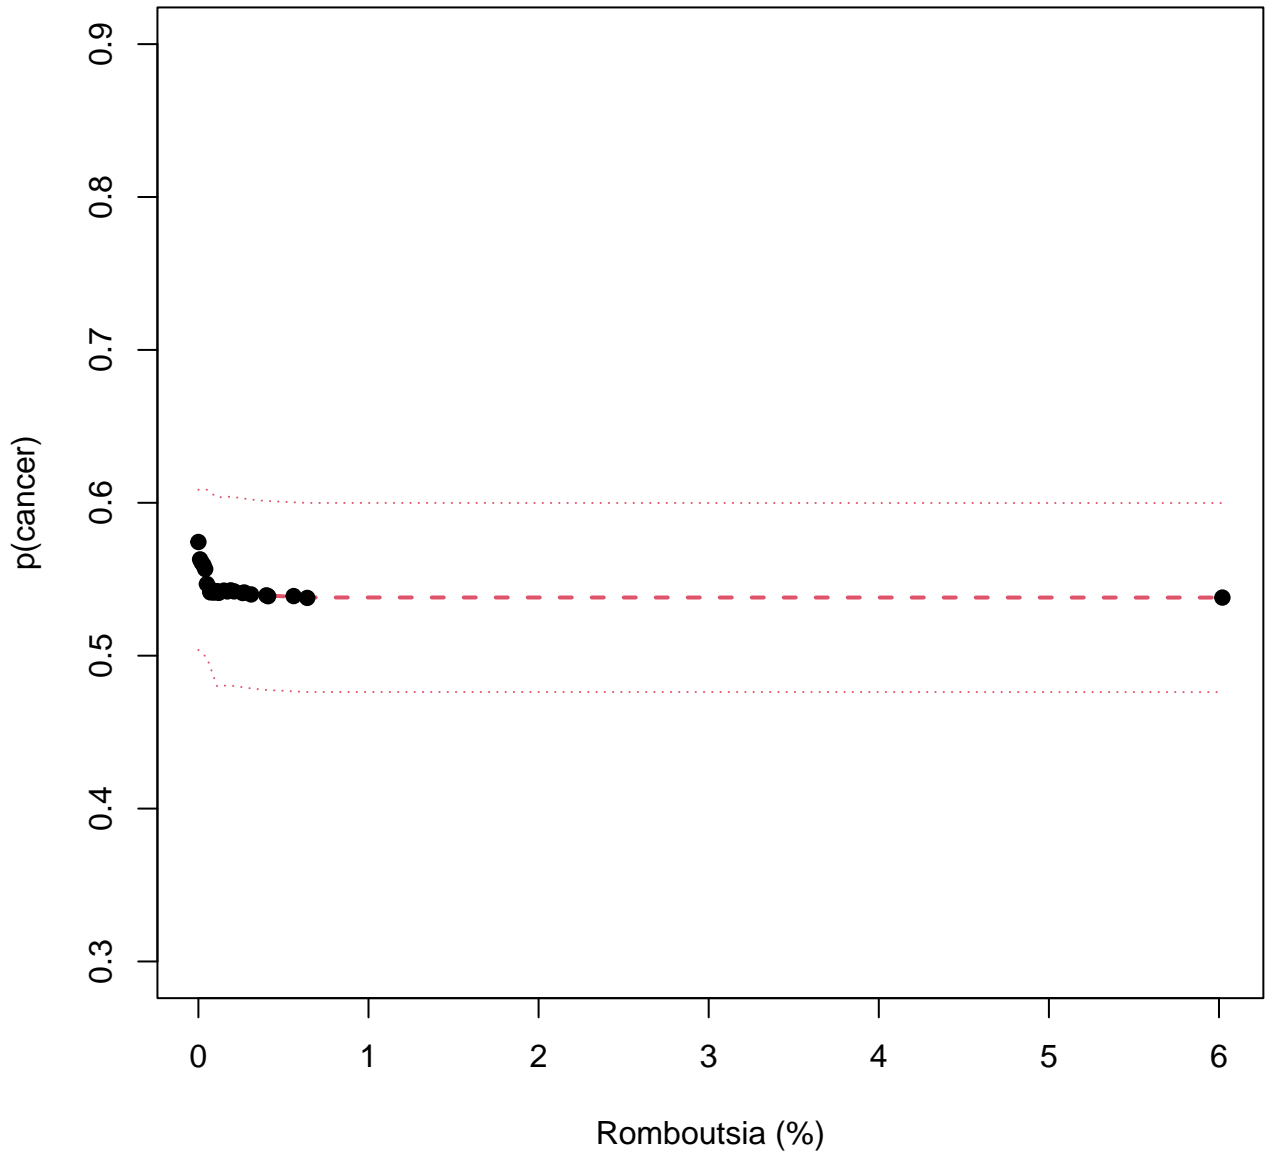

# Cancer vs ANHAC

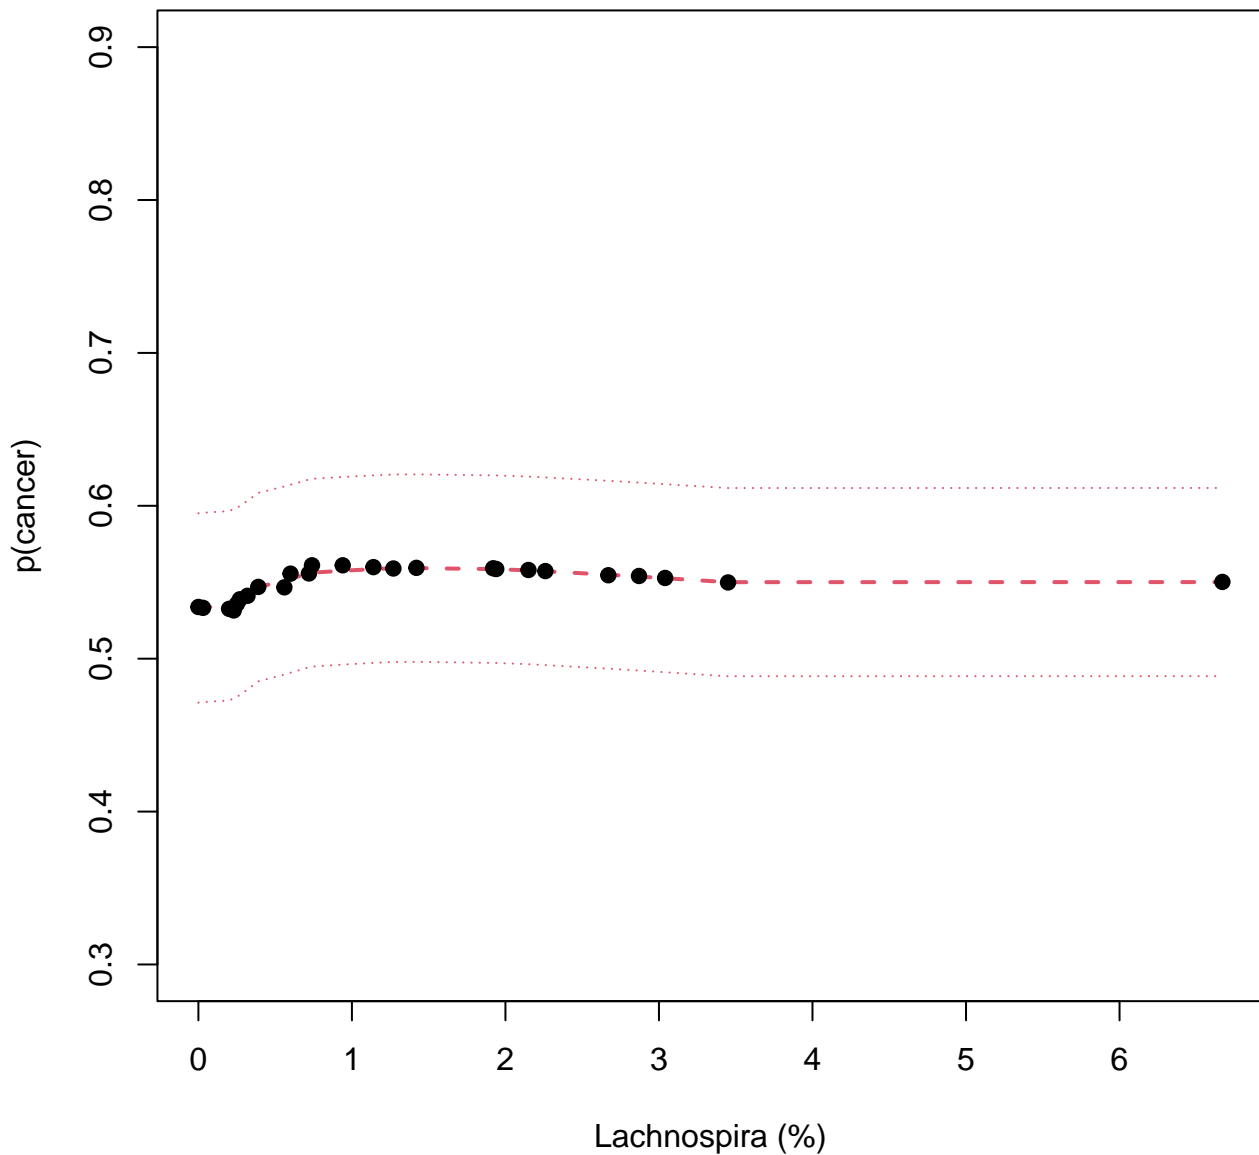

# Cancer vs ANHAC

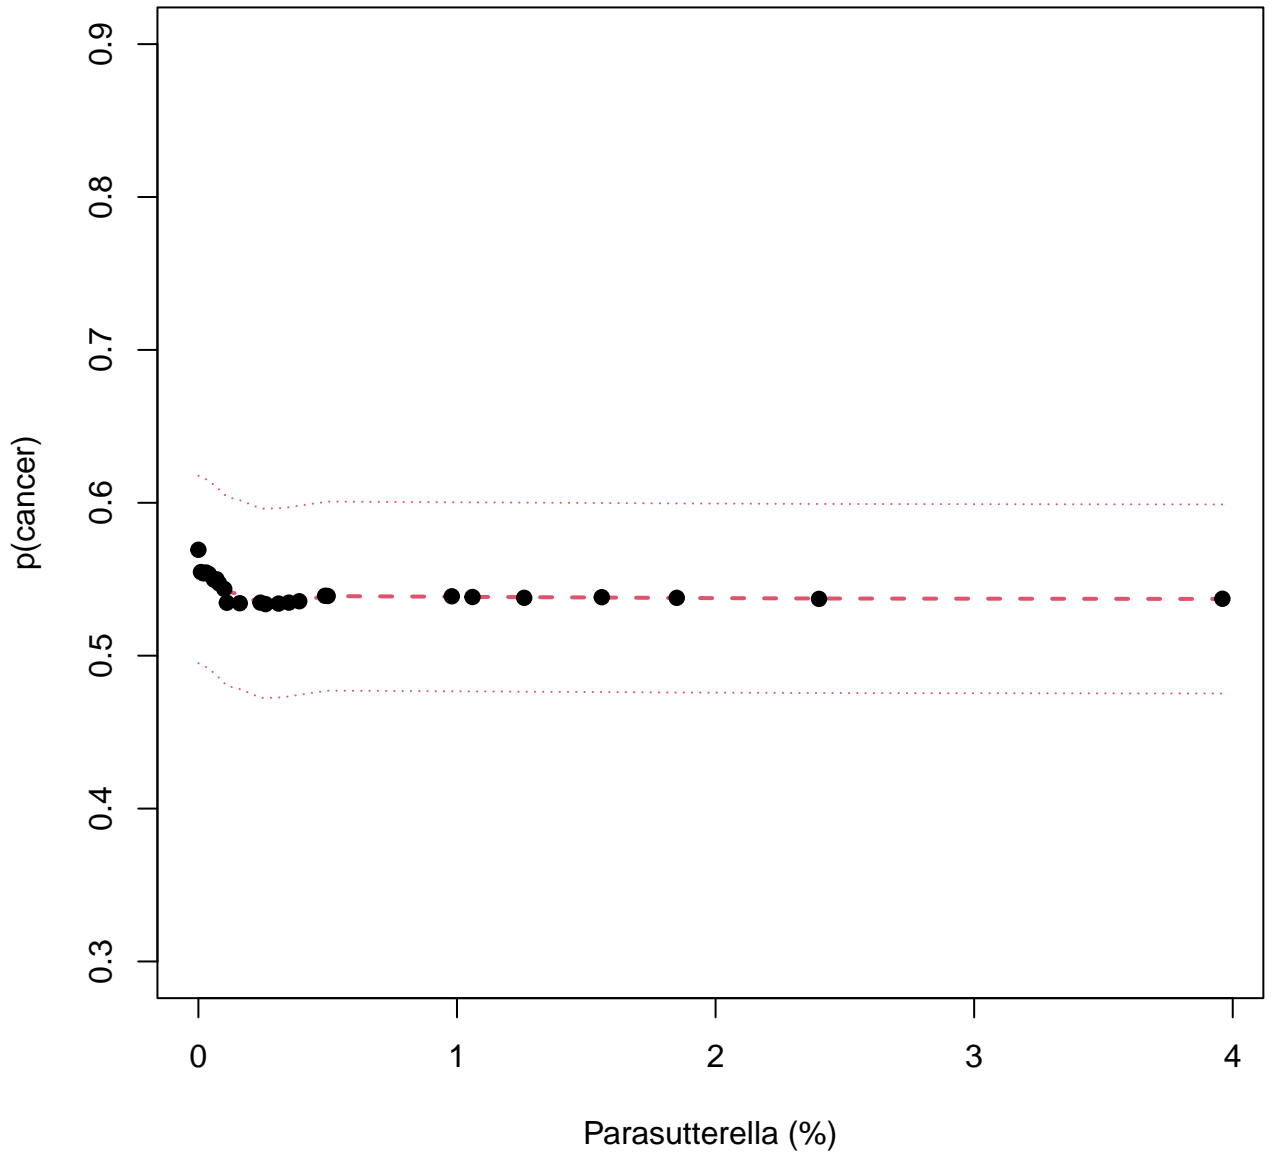

# Cancer vs ANHAC

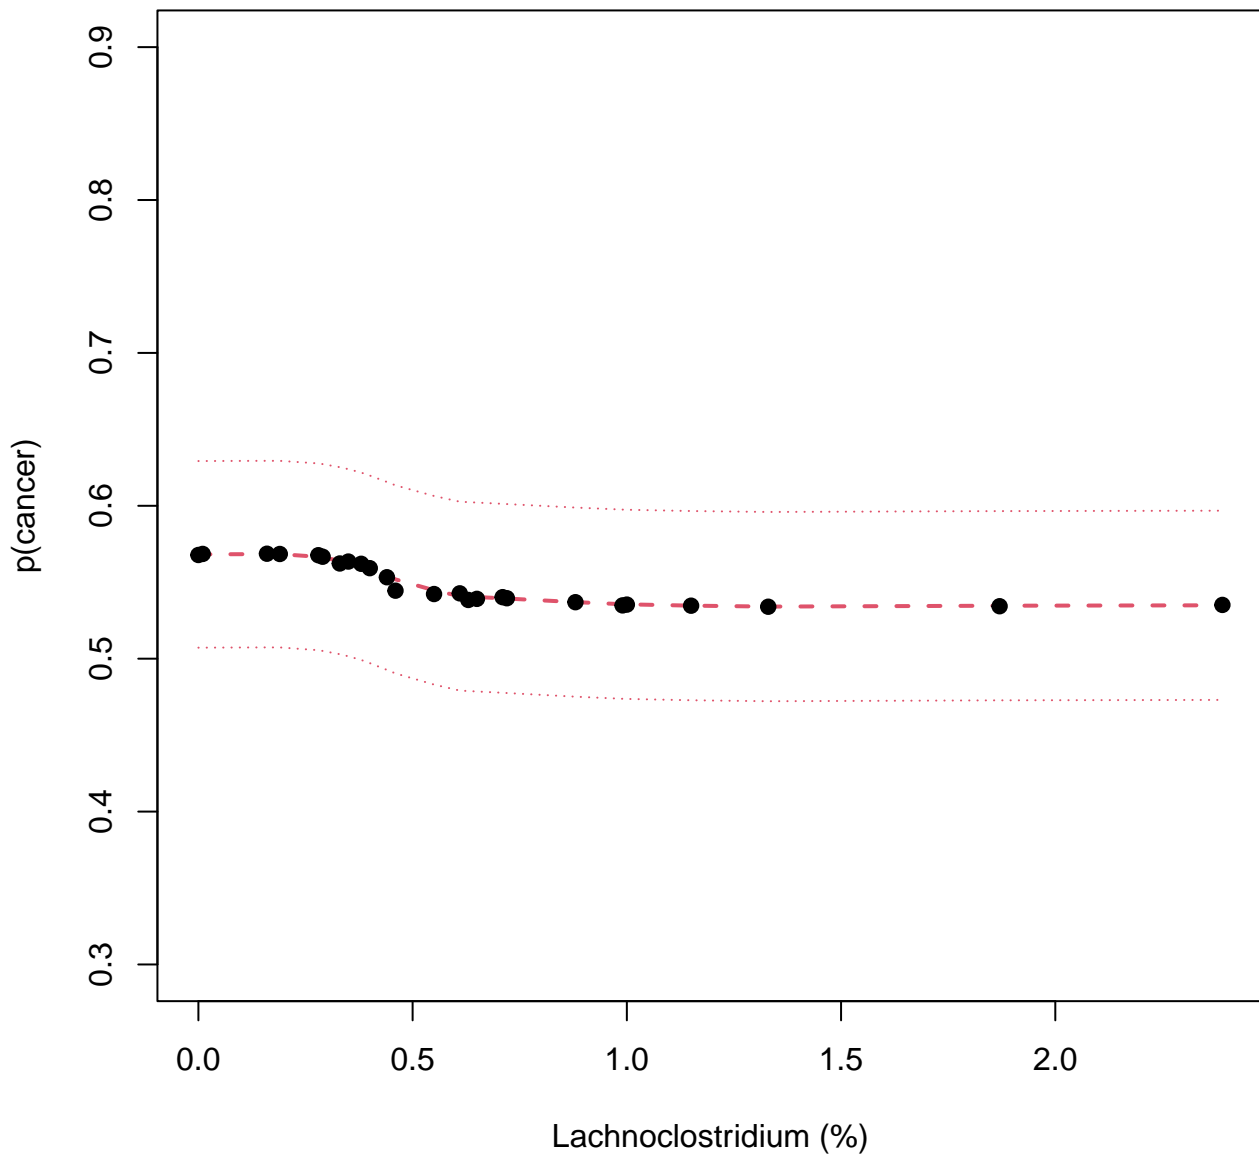

# Cancer vs ANHAC

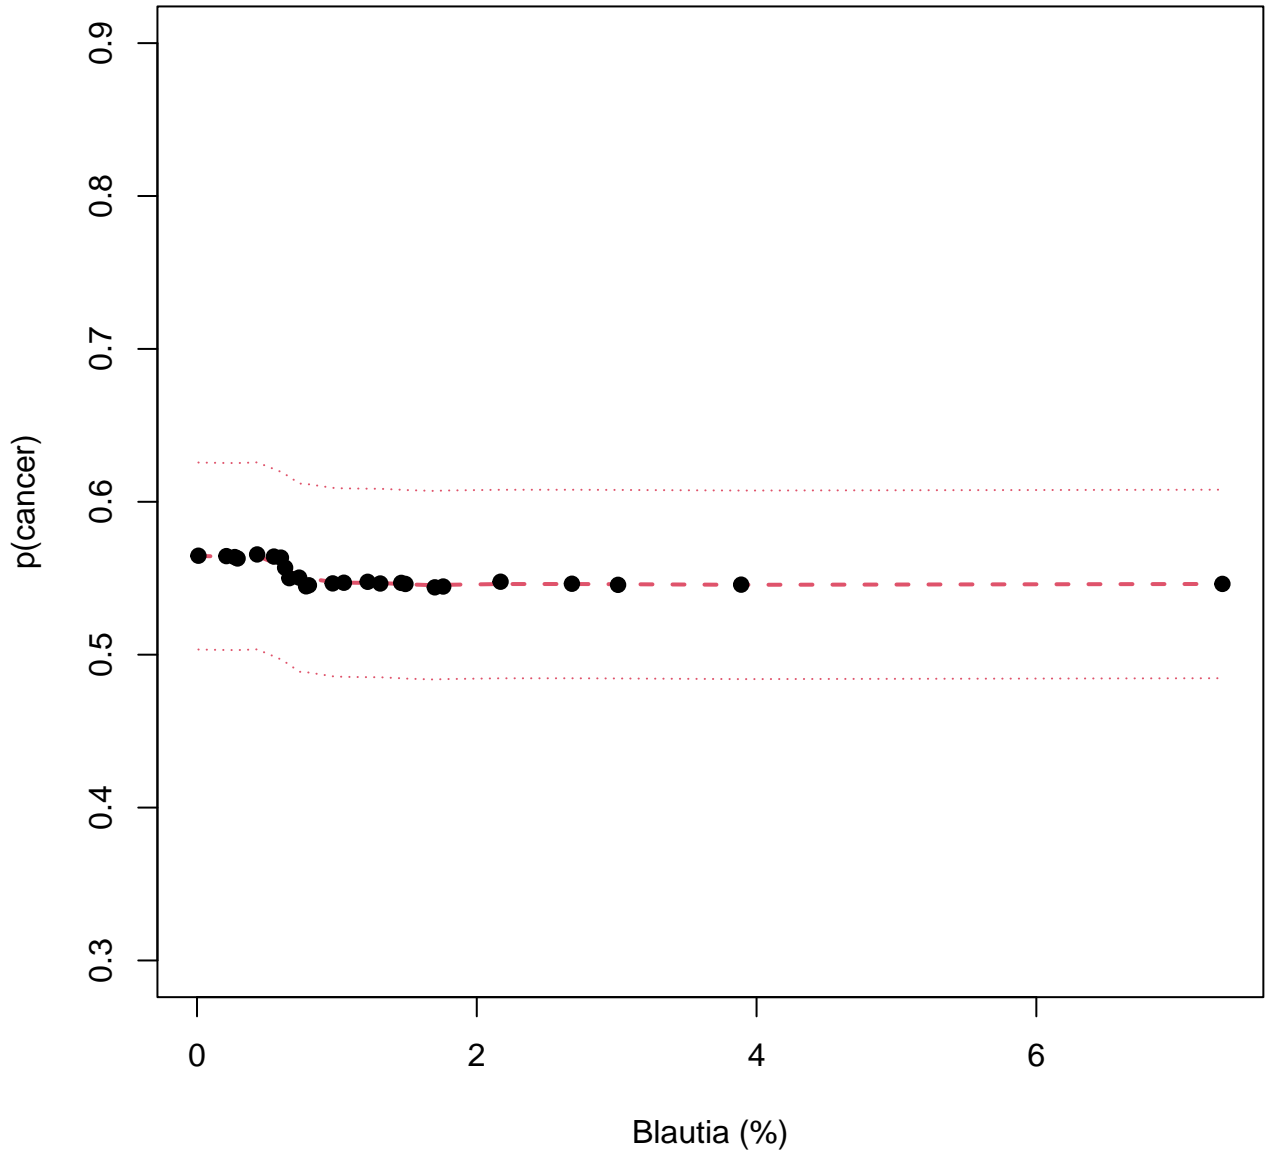

# Cancer vs ANHAC

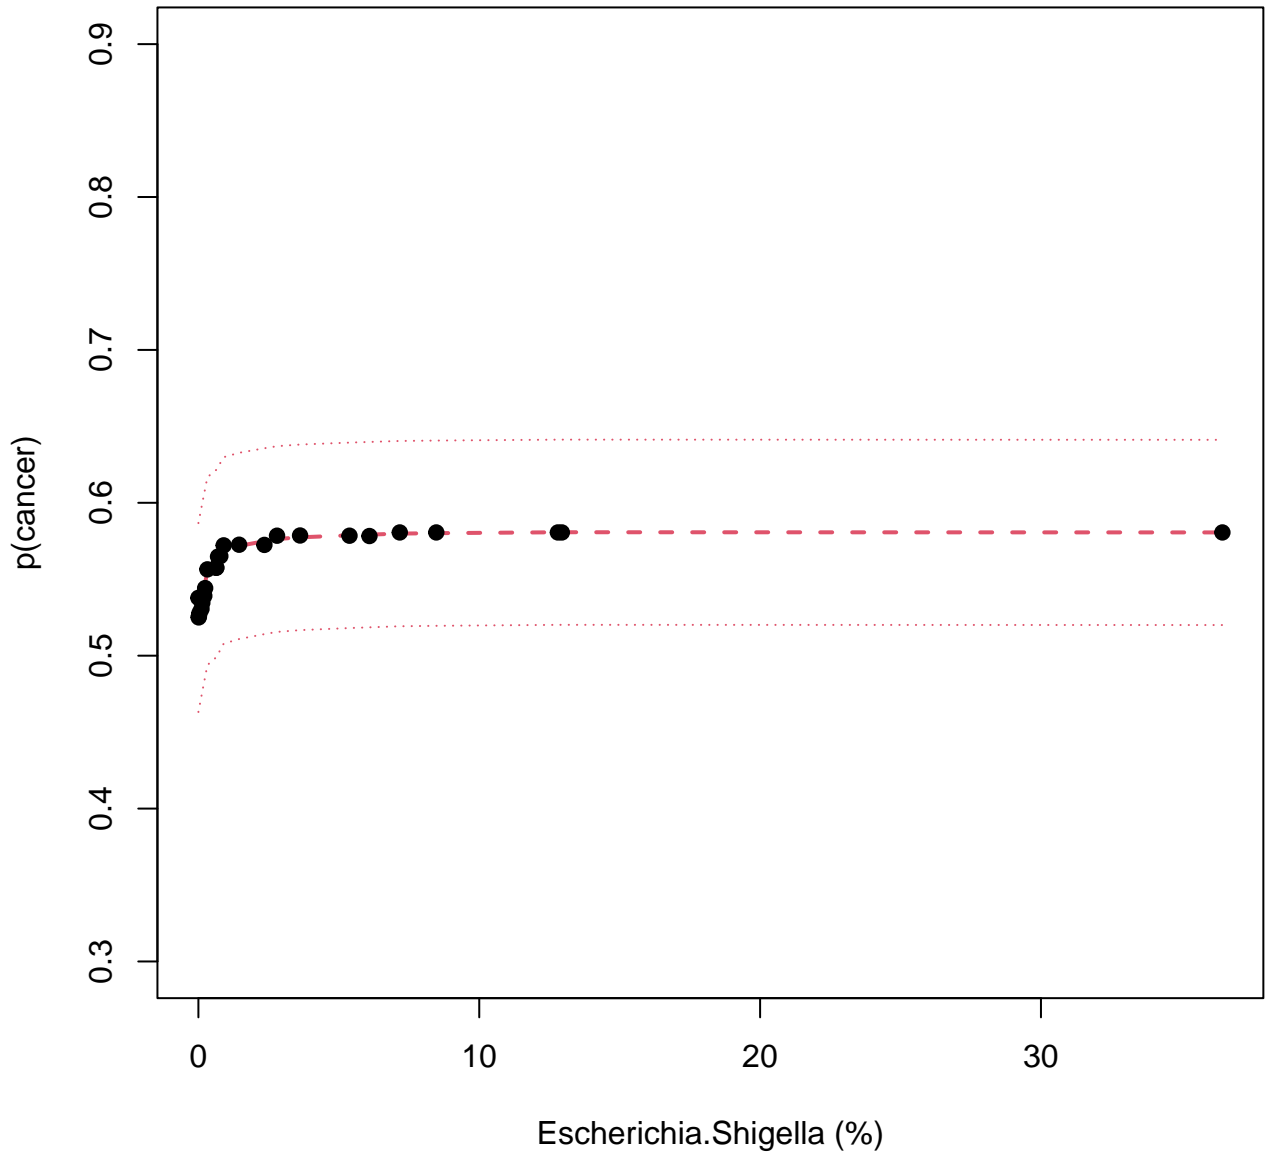

Supplement: Supplementary file [file media-7.pdf]
