# Supplementary material for: An approach to finding specific forms of dysbiosis that associate with different disorders
Source: bioRxiv or medRxiv preprint supplement (doi:10.1101/2024.04.23.24306162), 2024-04-24
Supplement: Supplementary file [file media-3.pdf]

```

# Cao's supplementary table 2, available at:
# https://www.sciencedirect.com/science/article/pii/S0969996123004114?via%3Dihub#ec0010
# we downloaded the above table and saved it as "Cao_tab2.csv"
# read in Cao Supplementary Table 2
cdat=read.csv(paste0(mydir, 'Cao_tab2.csv'), skip=1)

# extract genera from data file
dim(cdat); cdat=cdat[substr(cdat$Microbiota,1,6)=='genus.',]; dim(cdat)
cdat$Microbiota=gsub('[.]', 'X', cdat$Microbiota)
cdat$Microbiota=gsub('genusX', '', cdat$Microbiota)
gstop=regexpr('XidX', cdat$Microbiota)-1
cdat$Microbiota=substr(cdat$Microbiota,1,gstop)
cdat$Microbiota=gsub('X', '', cdat$Microbiota)

# rename genera to be compatible with those of main report
# (in order to be able to detect overlap for all available genera
# that can, in fact, correspond between Cao's data and ours)

cdat$Microbiota=gsub("Coprococcus3", "Coprococcus.3", cdat$Microbiota)
cdat$Microbiota=gsub("LachnospiraceaeUCG001", "Lachnospiraceae.UCG.001", cdat$Microbiota)
cdat$Microbiota=gsub("RuminococcaceaeUCG002", "Ruminococcaceae.UCG.002", cdat$Microbiota)
cdat$Microbiota=gsub(".Eubacteriumeligensgroup", "Eubacterium.eligens.group", cdat$Microbiota)
cdat$Microbiota=gsub("Ruminococcus1", "Ruminococcus.group.1", cdat$Microbiota)
cdat$Microbiota=gsub("Ruminococcus2", "Ruminococcus.group.2", cdat$Microbiota)
cdat$Microbiota=gsub("Prevotella9", "Prevotella.group.9", cdat$Microbiota)
cdat$Microbiota=gsub("Eubacteriumhalliigroup", "Eubacterium.hallii.group", cdat$Microbiota)
cdat$Microbiota=gsub("Eubacteriumruminantiumgroup", "Eubacterium.ruminantium.group", cdat$Microbiota)
cdat$Microbiota=gsub("Clostridiumsensustricto1", "Clostridium.sensu.stricto.1", cdat$Microbiota)
cdat$Microbiota=gsub("Clostridiuminnocuumgroup", "Clostridium.innocuum.group", cdat$Microbiota)
cdat$Microbiota=gsub("CandidatusSoleaferrea", "Candidatus.Soleaferrea", cdat$Microbiota)
cdat$Microbiota=gsub("ErysipelotrichaceaeUCG003", "Erysipelotrichaceae.UCG.003", cdat$Microbiota)
cdat$Microbiota=gsub("EscherichiaShigella", "Escherichia.Shigella", cdat$Microbiota)
cdat$Microbiota=gsub("Ruminiclostridium1", "Ruminiclostridium.group.1", cdat$Microbiota)
cdat$Microbiota=gsub("Ruminiclostridium6", "Ruminiclostridium.group.6", cdat$Microbiota)
cdat$Microbiota=gsub("Ruminiclostridium9", "Ruminiclostridium.group.9", cdat$Microbiota)
cdat$Microbiota=gsub("Tyzzerella3", "Tyzzerella", cdat$Microbiota)

# extract unique genera names
jum=unique(cdat$Microbiota); table(jum%in%names(bdat))
jum[!jum%in%names(bdat)]; names(bdat)[!names(bdat)%in%jum]

# next, read in our data
# read in data
mydir='/home/jonathan/Desktop/Atlas/'
bdat=read.csv(paste0(mydir, 'Dove_Atlas data 200424.csv'))
# check bdat structure
dim(bdat); names(bdat)[1:7]; table(bdat$dgn)
str(bdat); bdat[1:5,1:15]
# id is patient number; age is years; sex is 0=F, 1=M
# dgn is 1=cancer, 2=IBS, 4=ANHAC, 6=CFS

```

```

# ibs is presence of IBS; cfs is presence of ME/CFS
# all patients have ill=1 (yes)
# id age sex dgn ibs cfs ill Actinomyces Adlercreutzia Agathobacter Akkermansia
Alistipes
#1 1 77 0 2 1 0 1 0.02 0.00 0.95 0.02
3.36
#2 2 81 0 1 0 0 1 0.05 0.04 1.01 2.03
7.51
#3 3 75 1 4 0 0 1 0.00 0.00 0.01 0.58
3.36
#4 4 85 0 4 0 0 1 0.01 0.06 0.88 7.87
4.25
#5 5 50 0 2 1 1 1 0.00 0.07 0.04 9.61
3.53

```

```

# change all ages to quinquennia for purposes of publication (true ages
available on reasonable request)
# bdat$age=round(bdat$age/5)

```

```

# raretax is the sum of proportions of genera with more than 80% zero
observations
all(apply(bdat[,7:100],1,sum)==100) # TRUE
# pathgen is the sum of proportions of genera that Atlas defines as 'pathogenic'
and is unused here

```

```

# take the names of variables that are individual genera
bnames=names(bdat)[7:99]

```

```

# now that the names of the genera in both Cao's data and our are available
# we can do the permutation analysis to find out how often there would be
overlap of 2 genera
# (namely, Dialister and Roseburia) in random samples of 7 genera from Cao and 3
from our data
# (because Cao reported that 7 genera had causal effects on cognition and our
random forest
# analyses selected 3 taxa - Dialister, Roseburia and Unknown Bacteria - to
predict ME/CFS)

```

```

# set seed for repeatability (111 was cricket umpire "Dickie Bird's"
superstitious number)
# since he thought that it signifies the 3 stumps of a cricket wicket and that
when the batsmen
# next scored, one of the stumps (i.e. the wicket) would fall. So, he used to
hop when the score was 111!
# 100000 permutations

```

```

set.seed(111); N=1e5
# set up an array to hold the results of the 100000 permutations
res=rep(0,N)
for (i in 1:N) {
# in each run, select 7 genera from Cao's data-set
csamp=sample(jum,7)
# in each run, select 3 genera from data-set of the main report
jsamp=sample(bnames,3)
# record how many genera selected from Cao's data-set overlap those selected
from our data-set
if (any(jsamp%in%csamp)) res[i]=length(jsamp[jsamp%in%csamp])
}
# finally, report the results
table(res)
# res
# 0 1 2 3
# 87916 11634 449 1
# so p = 0.0045

```
