# Supplementary material for: An approach to finding specific forms of dysbiosis that associate with different disorders
Source: bioRxiv or medRxiv preprint supplement (doi:10.1101/2024.04.23.24306162), 2024-04-24
Supplement: Supplementary file [file media-4.pdf]

```

#####
# = START OF R CODE TO ANALYSE DATA =====#
# = FROM SUPPLEMENTARY TABLE S3B OF GACESA 2022 =====#
# =====#
# =====#
# =====#
# =====#
# =====#
# =====#
#####

# A FEW USEFUL FUNCTIONS
ac=function(x) return(as.character(x))
an=function(x) return(as.numeric(x))
anc=function(x) return(an(ac(x)))

# s3b IS TABLE S3B IN SUPPLEMENTARY INFORMATION OF GACESA (2022), available at:
# https://static-content.springer.com/esm/art%3A10.1038%2Fs41586-022-04567-7/
# MediaObjects/41586_2022_4567_MOESM4_ESM.xlsx
# we downloaded this and converted it to a comma-separated values (csv) file -
# "Gacesa_S3b.csv"
# this file is 14.8MB and is readily available, as above; therefore we do not
# include it, here

mydir='/home/jonathan/Desktop/Atlas/' # set working directory
s3b=read.table(paste0(mydir,'Gacesa_S3b.csv'),sep=',',header=T)

# eliminate multi-category phenotypes
s3b$effect_size=anc(gsub('0:',',',s3b$effect_size))

# check effect sizes
quantile(s3b$effect_size,na.rm=T)
dim(s3b); names(s3b); s3b[101:110,]

# find effect sizes for genera
gstart=regexpr('.g__',ac(s3b$taxon)); table(gstart)
gstop=regexpr('.s__',ac(s3b$taxon)); table(gstop)
glen=nchar(ac(s3b$taxon))
gok=gstart>0 & gstop<0 & gstart<glen # gstop<0 -> select overall genera, not
# individual species
s3b$genus=NA; s3b$genus[gok]=substr(ac(s3b$taxon[gok]),gstart[gok]+4,glen[gok])
# Gacesa reports effect sizes for 59 genera
length(table(s3b$genus)) # 59

# find effect sizes for species
gstart=regexpr('.s__',ac(s3b$taxon)); glen=nchar(ac(s3b$taxon))
gok=gstart>0 & gstart<glen # gstop<0 -> select individual species
s3b$species=NA; s3b$species[gok]=substr(ac(s3b$taxon[gok]),gstart[gok]
+4,glen[gok])
# Gacesa reports effect sizes for 136 species in the 59 genera
length(table(s3b$species)) # 136

# we want to compare the effect sizes for genera that our RF analyses
# identify as important for discriminating cancer, CFS, IBS or CFS+IBS
# with effect sizes for genera that our RF analyses do not identify as important

# here in Gacesa's data:-
# an hac is the equivalent of the ANHAC group in our study
# cancer is the equivalent of the cancer group
# ibs is the equivalent of pure IBS - which does not exist in our study

# retain only effect sizes for genera
s3j=s3b[!is.na(s3b$genus),]; dim(s3j)

```

```

# find names of all phenotypes that are medical diseases/conditions
alldis=regexpr('MED.DISEASES',ac(s3j$phenotype))>0; table(alldis)
# retain only effect sizes of genera on diseases/conditions
dim(s3j); s3j=s3j[alldis,]; dim(s3j)

# these are the diseases/conditions that we selected to study here
okudis=c(1,3,12,20:28,33,42,44,47,48,49,51:53,57:68) #
unique(s3j$phenotype)[okudis]
# [1] "MED.DISEASES.Blood.Anemia"
# [2] "MED.DISEASES.Cancer.AnyNonBasal"
# [3] "MED.DISEASES.Cardiovascular.Atherosclerosis"
# [4] "MED.DISEASES.Cardiovascular.Hypertension"
# [5] "MED.DISEASES.Endocrine.Autoimmune.DiabetesT1"
# [6] "MED.DISEASES.Endocrine.DiabetesT2"
# [7] "MED.DISEASES.Gastrointestinal.Autoimmune.Celiac"
# [8] "MED.DISEASES.Gastrointestinal.Autoimmune.IBD.CD"
# [9] "MED.DISEASES.Gastrointestinal.Autoimmune.IBD.UC"
#[10] "MED.DISEASES.Gastrointestinal.Stomach.Ulcer"
#[11] "MED.DISEASES.Hepatologic.Gallstones"
#[12] "MED.DISEASES.Hepatologic.Hepatitis"
#[13] "MED.DISEASES.Mental.Any"
#[14] "MED.DISEASES.Neurological.Autoimmune.Multiple.Sclerosis"
#[15] "MED.DISEASES.Neurological.Epilepsy"
#[16] "MED.DISEASES.Neurological.Mental.Fatigue.Chronic"
#[17] "MED.DISEASES.Neurological.Mental.Fibromyalgia"
#[18] "MED.DISEASES.Neurological.Migraine"
#[19] "MED.DISEASES.Neurological.Stroke"
#[20] "MED.DISEASES.None.No.Diseases"
#[21] "MED.DISEASES.Other.Autoimmune.Rheumatoid.Arthritis"
#[22] "MED.DISEASES.Other.Fractures.Hip"
#[23] "MED.DISEASES.Other.Fractures.Other"
#[24] "MED.DISEASES.Other.Kidney.Stones"
#[25] "MED.DISEASES.Other.Osteoarthritis"
#[26] "MED.DISEASES.Other.Osteoporosis"
#[27] "MED.DISEASES.Pulmonary.Autoimmune.Asthma"
#[28] "MED.DISEASES.Pulmonary.COPD"
#[29] "MED.DISEASES.Pulmonary.Pulmonary.Embolism"
#[30] "MED.DISEASES.Skin.Autoimmune.Atopic.dermatitis"
#[31] "MED.DISEASES.Skin.Autoimmune.Psoriasis"
#[32] "MED.DISEASES.Skin.Autoimmune.Severe.acne"
#[33] "MED.DISEASES.Gastrointestinal.Rome3_IBS.Any"

# use only the above selected diseases/conditions
s3j=s3j[as.factor(s3j$phenotype)%in%unique(s3j$phenotype)[okudis],]; dim(s3j)
table(s3j$phenotype) # effect sizes of 59 genera for each disease/condition

# extract size of group with each disease/condition
jtn=unlist(lapply(s3j[,5],strsplit,':')); ntn=1:length(jtn)
s3j[,5]=jtn[ntn%%2==0]; names(s3j)[5]='N'; table(s3j$N)
s3j$N=anc(s3j$N)

# define groups to analyse
cancer=regexpr('Cancer',ac(s3j$phenotype))>0; table(cancer)
ibs=regexpr('IBS',ac(s3j$phenotype))>0; table(ibs)
cfs=regexpr('atigue',ac(s3j$phenotype))>0; table(cfs)
fma=regexpr('ibromyalgia',ac(s3j$phenotype))>0; table(fma)
hc=regexpr('None.No.Diseases',ac(s3j$phenotype))>0; table(hc)
ms=regexpr('Multiple.Sclerosis',ac(s3j$phenotype))>0; table(ms)
table(cfs,ibs); table(cfs,fma); table(ibs,fma)

# there are, apparently, NO dual-diagnosis cases in the data-set
# this is probably an artefact of using regression-based effect sizes
# (because regression accounts for every other phenotype when defining

```

```

# effect of each taxon on each phenotype
# but Figure 4b also indicates little comorbidity (GP diagnoses?)

# define the an hac group
anhac=!cancer & !ibs & !cfs & !hc & !fma

# check the an hac group (we selected a genus with a short name, for convenience)
s3j[anhac & s3j$genus=='Rothia',c(1,5)]

# COMPUTE EFFECT SIZES OF EACH SPECIFIC DISORDER, *RELATIVE TO ANHAC*
# labels of individual genera in the data
ng=ac(unique(s3j$genus)); ng=ng[order(ng)]; nglen=length(ng); ng
#define specific disorders of interest
specdis=c('HC','cancer','IBS','CFS','FMA','MS','ANHAC')
# set up an array to hold the new data
res=array(NA,c(nglen,6,7),dimnames=list(ng,c('t','p','R2','var','wtx','N'),specdis))

# for each genus, in turn
j=0; for (i in ng) { sok=s3j$genus==i; j=j+1
# find the effect sizes for all disorders comprising the an hac group
anhac_es=s3j$effect_size[sok & an hac]
# get the variances, standard deviations and means of the an hac group's effect sizes
van hac=var(an hac_es,na.rm=T); an hacsd=sqrt(van hac); ahx=mean(an hac_es)
# also get the Pvalues and group sizes of each an hac group
anhac_p=s3j$Pvalue[sok & an hac]
anhac_n=s3j$N[sok & an hac]
# print the genus, its group size, mean effect size and sd for the an hac group
cat(i,anhac_n,round(ahx,3),round(an hacsd,3),'\n')

# now repeat the above for the cfs, ibs, cancer, fibromyalgia and multiple
sclerosis groups
cfsx=s3j$effect_size[sok & cfs]
hcx=s3j$effect_size[sok & hc]
ibx=s3j$effect_size[sok & ibs]; vibs=var(ibx)
cax=s3j$effect_size[sok & cancer]; vca=var(cax)
fmx=s3j$effect_size[sok & fma]
msx=s3j$effect_size[sok & ms]
res[j,1,1]=hcx
res[j,2,1]=round(1-pt(abs(res[j,1,1]),length(an hac_es)-2),4)
res[j,1,2]=mean(cax)
res[j,2,2]=round(1-pt(abs(res[j,1,2]),length(an hac_es)-2),4)
res[j,1,3]=mean(ibx)
res[j,2,3]=round(1-pt(abs(res[j,1,3]),length(an hac_es)-2),4)
res[j,1,4]=cfsx
res[j,2,4]=round(1-pt(abs(res[j,1,4]),length(an hac_es)-2),4)
res[j,1,5]=fmx
res[j,2,5]=round(1-pt(abs(res[j,1,5]),length(an hac_es)-2),4)
res[j,1,6]=msx
res[j,2,6]=round(1-pt(abs(res[j,1,6]),length(an hac_es)-2),4)
res[j,1,7]=ahx/an hacsd
res[j,2,7]=round(1-pt(abs(res[j,1,7]),length(an hac_es)-2),4)
res[j,3,1]=s3j$R2[sok&hc]
res[j,3,2]=s3j$R2[sok&cancer]
res[j,3,3]=s3j$R2[sok&ibs]
res[j,3,4]=s3j$R2[sok&cfs]
res[j,3,5]=s3j$R2[sok&fma]
res[j,3,6]=s3j$R2[sok&ms]
res[j,3,7]=mean(s3j$R2[sok&an hac])
res[j,4,1]=1 #s3j$R2[sok&hc]
res[j,4,2]=1 #s3j$R2[sok&cancer]
res[j,4,3]=1 #s3j$R2[sok&ibs]
res[j,4,4]=1 #s3j$R2[sok&cfs]

```

```

res[j,4,5]=1 #s3j$R2[sok&fma]
res[j,4,6]=1 #s3j$R2[sok&ms]
res[j,4,7]=vanhac
res[j,5,1]=1
res[j,5,2]=1
res[j,5,3]=1
res[j,5,4]=1
res[j,5,5]=1
res[j,5,6]=1
res[j,5,7]=weighted.mean(anhac_es, log(1/anhac_p))
#round(ks.test(anhac_es, res[j,2,6])$p.value,4)
res[j,6,7]=weighted.mean(anhac_es, anhac_n) #round(ks.test(anhac_es, res[j,2,6])
$p.value,4)
} # end for i in ng
res[, , 'ANHAC']

# check that the new data array - 'res' - looks sensible
round(cbind(res[,6, 'ANHAC'], res[,1, 'IBS'], res[,1, 'CFS'], res[,1, 'cancer']),2)

# Gacesa abbreviated some species names
# S. salivarius = Streptococcus salivarius
# C. asparagiforme = Clostridium asparagiforme
# R. gnavus = Ruminococcus gnavus
# E. rectale = Eubacterium
# F. prausnitzii = Faecalibacterium
# D. piger = Desulfovibrio
# A. senegalensis = Alistipes
# B. longum = Bifidobacterium

# FROM GACESA FIGURE 4A
# genera that associate negatively with healthy controls
hcneg=c('Clostridium', 'Anaerotruncus', 'Ruminococcus', 'Ruminococcaceae',
'Eggerthella', 'Flavonifractor', 'Oscillibacter', 'Pseudoflavonifractor',
'Holdemania', 'Streptococcus', 'Veillonella', 'Bifidobacterium', 'Lachnospiraceae')
# genera that associate positively with healthy controls
hcpos=c('Faecalibacterium', 'Eubacterium', 'Subdoligranulum', 'Dorea',
'Bifidobacterium', 'Butyrovibrio', 'Alistipes', 'Desulfovibrio',
'Prevotella', 'Paraprevotella', 'Mitsuokella', 'Barnesiella', 'Bacteroidiales')
pos_es=res[dimnames(res)[[1]]%in%hcpos,1, 'HC']
neg_es=res[dimnames(res)[[1]]%in%hcneg,1, 'HC']
t.test(pos_es, neg_es); wilcox.test(pos_es, neg_es)
xl='clinical grouping'; yl='effect size'
boxplot(neg_es, pos_es, notch=T, varwidth=T, xaxt='n', xlab=xl, ylab=yl)
axis(side=1, at=c(1,2), labels=c('negative', 'positive'))
legend('topleft', legend=c('Clostridium', 'Anaerotruncus', 'Ruminococcus',
'Ruminococcaceae', 'Eggerthella', 'Flavonifractor', 'etc.'), cex=0.75)
legend('bottomright', legend=c('Faecalibacterium', 'Eubacterium', 'Subdoligranulum'
',
'Dorea', 'Bifidobacterium', 'etc.'), cex=0.75)
xl="effect sizes of genera for HC (cf Gacesa's Fig 4a)"
# compare with Gacesa Figure 4a

# now, we need to match the genera in our data-set with those in Gacesa's
dovegen=c("Actinomyces", "Adlercreutzia", "Agathobacter",
"Akkermansia", "Alistipes", "Anaerostipes", "Anaerotruncus", "Bacteroides",
"Barnesiella", "Bifidobacterium", "Bilophila", "Blautia", "Butyricicoccus",
"Butyricimonas", "Candidatus.Soleaferrea", "Chloroplast.group.2",
"Clostridium.sensu.stricto.1", "Collinsella", "Coprobacter", "Coproccoccus.3",
"Desulfovibrio", "Dialister", "Dorea", "DTU089", "Eggerthella", "Eisenbergiella",
"Erysipelatoclostridium", "Erysipelotrichaceae.UCG.003", "Escherichia.Shigella",
"Eubacterium.eligens.group", "Eubacterium.hallii.group", "Faecalibacterium",
"Flavonifractor", "Gordonibacter", "Haemophilus", "Holdemanella", "Holdemania",
"Hungatella", "Intestinibacter", "Intestinimonas", "Lachnoclostridium", "Lachnospira
",

```

```

"Lachnospiraceae.UGC.001", "Lactobacillus", "Methanobrevibacter", "Mitsuokella",
"Mogibacterium", "Muribaculum", "Odoribacter", "Olsenella", "Oscillibacter", "Oxaloba
cter",
"Papillibacter", "Parabacteroides", "Parasutterella", "Phascolarctobacterium", "Phoc
ea",
"Prevotella.group.9", "Romboutsia", "Roseburia", "Rothia", "Ruminiclostridium",
"Ruminiclostridium.group.1", "Ruminiclostridium.group.6", "Ruminiclostridium.group
.9",
"Ruminococcaceae.UGC.002", "Ruminococcus.group.1", "Ruminococcus.group.2",
"Ruminococcus.Lachnospiraceae", "Senegalimassilia", "Slackia", "Streptococcus",
"Sutterella", "Terrisporobacter", "Turicibacter", "Tyzzerella", "UBA1819",
"Unknown.Bacteria", "Unknown.Bacteroidales", "Unknown.Burkholderiaceae",
"Unknown.Christensenellaceae", "Unknown.Clostridiales", "Unknown.Coriobacteriales"
,
"Unknown.Enterobacteriaceae", "Unknown.Erysipelotrichaceae", "Unknown.Firmicutes",
"Unknown.Lachnospiraceae", "Unknown.Ruminococcaceae", "Veillonella", "Victivallis")
# which of Gacesa's genera do not occur in our complete list of genera
# (complete = before selection of genera to discriminate ANHAC group from single
disorders)
na.omit(unique(s3j$genus)[!s3j$genus%in%dovegen])
# which of our genera do not occur in Gacesa's list of genera
na.omit(unique(dovegen)[!dovegen%in%s3j$genus])
unique(s3j$genus)[order(unique(s3j$genus))]
s3gen=c("Acidaminococcus", "Actinomyces", "Adlercreutzia", "Akkermansia",
"Alistipes", "Anaerostipes", "Anaerotruncus", "Bacteroidales_noname",
"Bacteroides", "Barnesiella", "Bifidobacterium", "Bilophila", "Blautia",
"Burkholderiales_noname", "Butyrivibrio", "Catenibacterium",
"Clostridiales_noname", "Clostridium", "Collinsella", "Copro bacter",
"Coprococcus", "Desulfovibrio", "Dialister", "Dorea", "Eggerthella",
"Erysipelotrichaceae_noname", "Escherichia", "Eubacterium",
"Faecalibacterium", "Flavonifractor", "Gordonibacter", "Haemophilus",
"Holdemania", "Klebsiella", "Lachnospiraceae_noname", "Lactobacillus",
"Megamonas", "Megasphaera", "Methanobrevibacter", "Mitsuokella",
"Odoribacter", "Oscillibacter", "Oxalobacter", "Parabacteroides",
"Paraprevotella", "Parasutterella", "Peptostreptococcaceae_noname",
"Phascolarctobacterium", "Prevotella", "Pseudoflavonifractor", "Roseburia",
"Rothia", "Ruminococcaceae_noname", "Ruminococcus", "Streptococcus",
"Subdoligranulum", "Sutterella", "Sutterellaceae_unclassified", "Veillonella")

# rename some genera in our study to match those in Gacesa's
# (we are not specialists in taxonomy of microbiota -
# so, we apologise if there are errors)
dovegen[dovegen=='Unknown.Clostridiales']='Clostridiales_noname'
dovegen[dovegen=='Unknown.Ruminococcaceae']='Ruminococcaceae_noname'
dovegen[dovegen=='Unknown.Bacteroidales']='Bacteroidales_noname'
dovegen[dovegen=='Unknown.Lachnospiraceae']='Lachnospiraceae_noname'
dovegen[dovegen=="Eubacterium.hallii.group"]="Eubacterium"
dovegen[dovegen=="Eubacterium.eligens.group"]="Eubacterium"
dovegen[dovegen=="Clostridium.senus.stricto.1"]="Clostridium"
dovegen[dovegen=="Escherichia.Shigella"]="Escherichia"
dovegen[dovegen=="Prevotella.group.9"]="Prevotella"
dovegen[dovegen=="Erysipelotrichaceae.UGC.003"]="Erysipelotrichaceae_noname"
dovegen[dovegen=="Ruminococcus.group.1"]="Ruminococcus"
dovegen[dovegen=="Ruminococcus.group.2"]="Ruminococcus"
dovegen[dovegen=="Ruminococcus.Lachnospiraceae"]="Ruminococcaceae_noname"
dovegen[dovegen=="Ruminococcaceae.UGC.002"]="Ruminococcaceae_noname"

dovegen[dovegen%in%s3gen] # 49 of our genera occur also in Gacesa's genera
dovegen[!dovegen%in%s3gen] # 41 of our genera do not occur in Gacesa's genera
s3gen[s3gen%in%dovegen] # 44 of Gacesa's genera occur in our genera (why not
49?)
s3gen[!s3gen%in%dovegen] # 14 of Gacesa's genera do not occur in our genera

okgen=unique(dovegen[dovegen%in%s3gen]); okgen # 45 genera in common

```

```

# trim down the working data-set to include only those 45 genera
# and check the structure of the working data-set
res=res[okgen,,]; str(res)

# load libraries with robust regression routines
library(MASS); library(robustbase)

# plot variance of effect sizes (y-axis) against their mean (x-axis)
xl='mean(ANHAC effect sizes)'; yl='var(ANHAC effect sizes)'
plot(res[,6,'ANHAC'],res[,4,'ANHAC'],ylab=yl,xlab=xl); abline(v=0,lty=3)
rqd=lmrob(res[,4,'ANHAC']~res[,6,'ANHAC']+I(res[,6,'ANHAC']^2))
summary(rqd); curve(coef(rqd)[1]+coef(rqd)[2]*x+coef(rqd)[3]*x^2,add=T)
# so, for some reason, the mean and variance of the ANHAC effect sizes covary
# it often happens that means and variances covary in biological data
# should we take account of this covariance? - and if we should, then how?
# 2 possibilities - (1) divide mean by variance; (2) weight mean by variance

# NOW CHECK IF THERE IS A NEGATIVE RELATIONSHIP BETWEEN EFFECT SIZES OF GENERA
# ON ANHAC AND HC GROUPS (cf GACESA'S FIGURE 4)
rc0=lmrob(scale(res[,1,'ANHAC'])~scale(res[,1,'HC'])) # QUOTED
round(summary(rc0)$coef,3); summary(rc0)$sigma; summary(rc0)$adj.r.squared
rc1=lmrob(scale(res[,6,'ANHAC'])~res[,1,'HC'])
round(summary(rc1)$coef,3); summary(rc1)$sigma; summary(rc1)$adj.r.squared
rc0a=lmrob(scale(res[,1,'ANHAC'])~res[,1,'HC'],weights=1/res[,4,'ANHAC'])
round(summary(rc0a)$coef,3); summary(rc0a)$sigma; summary(rc0a)$adj.r.squared
rc1a=lmrob(scale(res[,6,'ANHAC'])~res[,1,'HC'],weights=1/res[,4,'ANHAC'])
round(summary(rc1a)$coef,3); summary(rc1a)$sigma; summary(rc1a)$adj.r.squared
# empirically, the raw mean effect sizes explain more variance of genera
# than the weighted-mean effect sizes, in regression of ANHAC on HC values
# therefore, use raw mean effect sizes in further analyses
# plot the raw mean effect sizes of ANHAC vs HC - Figure S1 in Supplementary
Information
xl='effect sizes in Healthy controls'; yl='effect sizes in ANHAC grouping'
plot(scale(res[,6,'ANHAC'])~scale(res[,1,'HC']),xlab=xl,ylab=yl)
abline(lmrob(scale(res[,6,'ANHAC'])~scale(res[,1,'HC'])))

##### CANCER #####
# first, how far does Gacesa's cancer grouping resemble their anhad grouping
ms0a=lmrob(scale(res[,1,'cancer'])~scale(res[,6,'ANHAC'])) # QUOTED -and see
Figure S3, below
round(summary(ms0a)$coef,3); summary(ms0a)$sigma; summary(ms0a)$adj.r.squared
# adding the effect sizes of genera for HC group does not alter the above
regression
ms0b=lmrob(scale(res[,1,'cancer'])~scale(res[,6,'ANHAC'])+scale(res[,1,'HC']))
round(summary(ms0b)$coef,3); summary(ms0b)$sigma; summary(ms0b)$adj.r.squared
anova(ms0a,ms0b)

# the deviations from the above relationship (from Gacesa's data)
# may indicate genera that associate specifically with cancer
# So, analyse those deviations according to whether random forest selected those
genera
# to discriminate the ANHAC and cancer groupings in *our* data.
cagen=c("Escherichia.Shigella","Ruminococcaceae_noname",
"Collinsella","Bifidobacterium","Unknown.Firmicutes",
"UBA1819","Bilophila","Ruminococcus","Coriobacteriales_noname",
"Enterobacteriaceae_noname","Lachnoclostridium",
"Intestinibacter","Romboutsia","Haemophilus","Intestinimonas",
"Ruminiclostridium.group.9","Chloroplast.group.2",
"Olsenella","Coprobacter","Parasutterella","Lachnospira",
"Dialister","Streptococcus","Erysipelotrichaceae",
"Faecalibacterium","Flavonifractor","Holdemania",
"Ruminiclostridium","Dorea","Victivallis",
Eubacterium","Sutterella","Parabacteroides")

```

```

caok=as.numeric(dimnames(res)[[1]]%in%cagen); table(caok) # 2

# plot the dependence of Gacesa's effect sizes in cancer on those in their an hac
group
scr_anhac=scale(res[,6,'ANHAC']); scr_ca=scale(res[,1,'cancer'])
xl='genus-wise mean effect sizes in ANHAC grouping'
yl='effect sizes in cancer grouping'
# the deviations from the above relationship (from Gacesa's data)
# may indicate genera that associate specifically with cancer.
# So, highlight those genera in the figure
plot(scale(res[,6,'ANHAC']),scale(res[,1,'cancer']), xlab=xl, ylab=yl) # Figure
S3
abline(coef(ms0a)[1:2])
for (i in cagen[cagen%in%dimnames(res)[[1]]])
points(scr_anhac[i,1],scr_ca[i,1],pch=19)
resca=resid(ms0a)[caok==1]; resanhac1=resid(ms0a)[caok==0]

# plot the densities of the residuals, according to whether RF selected them in
our data
plot(density(resid(ms0a)[caok==0]),xlim=c(-3.5,3), main='', xlab='unexplained
effect')
lines(density(resid(ms0a)[caok==1]),lty=2);
legend('topleft',lty=c(0,1,2),legend=c('RF','No','Yes'))
# it appears that the effect sizes - in Gacesa's data - of genera that RF
selected to discriminate
# our ANHAC and cancer groups have greater variance than the genera that RF did
not select

# Finally, test if the deviations from the association between an hac and cancer
groupings
# in Gacesa's data are greater for genera that our RF analyses selected to
discriminate
# ANHAC from cancer than for those that our RF analyses did not select
# specifically, do the variances of the residuals of the selected and unselected
genera differ?
jF=var(resid(ms0a)[caok==1])/var(resid(ms0a)[caok==0]);
wilcox.test(abs(resid(ms0a))~caok)
jt=table(caok); jF; jt; 1-pf(jF,jt[2]-1,jt[1]-1) # F=2.13, df=15/28, p=0.041 #
QUOTED
# GENERA THAT ASSOCIATE PARTICULARLY WITH CANCER, OVER-AND-ABOVE THEIR
ASSOCIATION WITH ANHAC
resid(ms0a)[abs(resid(ms0a))>1]
#           Desulfovibrio           Dialister
Erysipelotrichaceae_noname
#           -1.297263           -1.365982
1.402215
#           Haemophilus           Parasutterella
Rothia
#           -1.854824           1.197394
1.478908
#           Ruminococcaceae_noname           Streptococcus
#           1.386178           -1.043001

##### IBS #####
ibsgen=unique(c("Dialister","Ruminococcaceae","Unknown.Bacteria",
"Bilophila","Coproccoccus","Victivallis",
"Mogibacterium","Romboutsia","Ruminococcus",
"Ruminiclostridium","Bifidobacterium","Parabacteroides",
"Roseburia","Erysipelotrichaceae","Holdemania",
"Agathobacter","Parasutterella","Intestinibacter",
"Prevotella","Lachnoclostridium","Dorea",
"Candidatus.Soleaferrea","Bacteroides","Ruminococcus",
"Olsenella","UBA1819","Eubacterium","Flavonifractor"))
length(ibsgen) # 26

```

```

ibsok=as.numeric(dimnames(res)[[1]]%in%ibsgen); table(ibsok) # 14

ms0a=lmrob(scale(res[,1,'IBS'])~scale(res[,6,'ANHAC']))
round(summary(ms0a)$coef,3); summary(ms0a)$sigma; summary(ms0a)$adj.r.squared
ms0b=lmrob(scale(res[,1,'IBS'])~scale(res[,6,'ANHAC'])+scale(res[,1,'HC']))
round(summary(ms0a)$coef,3); summary(ms0a)$sigma; summary(ms0a)$adj.r.squared
anova(ms0a,ms0b)

scr_anhac=scale(res[,6,'ANHAC']); scr_ibs=scale(res[,1,'IBS'])
xl='genus-wise mean effect sizes in ANHAC grouping'
yl='effect sizes in IBS group'
plot(scale(res[,6,'ANHAC']),scale(res[,1,'IBS']), xlab=xl, ylab=yl)
abline(coef(ms0a)[1:2])
for (i in cagen[cagen%in%dimnames(res)[[1]]])
points(scr_anhac[i,1],scr_ibs[i,1],pch=19)

resibs=resid(ms0a)[ibsok==1]; resanhac2=resid(ms0a)[ibsok==0]
jF=var(resid(ms0a)[ibsok==1])/var(resid(ms0a)[ibsok==0])
jt=table(ibsok); jF; jt; 1-pf(jF,jt[2]-1,jt[1]-1) # F=1.34, df=12/31, p=0.25
resid(ms0a)[abs(resid(ms0a))>1]; wilcox.test(abs(resid(ms0a))~ibsok)
#
#           Holdmania
#           1.00687

# finally, combine the data for IBS and cancer groupings
# make a vector to hold the unselected (anhac) effect sizes
resanhac=rep(NA,length(unique(c(names(resanhac1),names(resanhac2)))))
names(resanhac)=unique(c(names(resanhac1),names(resanhac2)))
# and populate the vector with the mean unselected (anhac) effect sizes
for (i in names(resanhac)) {
if (i%in%names(resanhac1)&i%in%names(resanhac2)) {
resanhac[i]=mean(c(resanhac1[i],resanhac2[i])) }
if (i%in%names(resanhac1)&!i%in%names(resanhac2)) {
resanhac[i]=resanhac1[i] }
if (!i%in%names(resanhac1)&i%in%names(resanhac2)) {
resanhac[i]=resanhac2[i] }}

# make a vector to hold the selected (cancer or IBS) effect sizes
residis=rep(NA,length(unique(c(names(resibs),names(resca)))))
names(residis)=unique(c(names(resibs),names(resca)))
# and populate the vector with the mean selected (cancer or IBS) effect sizes
for (i in names(residis)) {
if (i%in%names(resibs)&i%in%names(resca)) {
residis[i]=mean(c(resibs[i],resca[i])) }
if (i%in%names(resibs)&!i%in%names(resca)) {
residis[i]=resibs[i] }
if (!i%in%names(resibs)&i%in%names(resca)) {
residis[i]=resca[i] }}

# table(names(residis)%in%names(resanhac))
# FALSE TRUE
#      9    11
var(resanhac[!names(resanhac)%in%names(residis)])
# [1] 0.1361223
var(resanhac[names(resanhac)%in%names(residis)])
# [1] 0.134783

# variance ratio of all residuals of effect sizes in Gacesa's data
# according to whether they were selected to discriminate individual disorders
in our study
var(residis)/var(resanhac); length(residis)-1; length(resanhac)-1
1-pf(var(residis)/var(resanhac),length(residis)-1,length(resanhac)-1)

# exclude residuals that were selected to discriminate both cancer and IBS -

```



QUOTED

```
aok=!names(resanhac)%in%names(residis)
var(residis)/var(resanhac[aok]); length(residis)-1; length(resanhac[aok])-1
1-pf(var(residis)/var(resanhac[aok]), length(residis)-1, length(resanhac[aok])-1)
# F = 3.133, 19/24df, p=0.0046
# exclude residuals that were selected to discriminate only cancer or only IBS
(i.e. not both)
var(residis)/var(resanhac[!aok]); length(residis)-1; length(resanhac[!aok])-1
1-pf(var(residis)/var(resanhac[!aok]), length(residis)-1, length(resanhac[!aok])-1)
# F = 3.164, 19/10df, p=0.033
```

```
plot(density(residis, adjust=1.5),ylim=c(0,1.5),main='',xlab='standardised
residual',lty=2)
lines(density(resanhac[aok], adjust=1.5),lty=1)
legend('topleft',lty=c(1,2),legend=c('not selected','selected'))
```

##### CFS #####

```
cfsgen=c("Roseburia","Dialister")
cfsok=as.numeric(dimnames(res)[[1]]%in%cfsgen); table(cfsok) # 2
```

```
ms0a=lmrob(scale(res[,1,'CFS'])~scale(res[,6,'ANHAC'])+scale(res[,1,'CFS']))
round(summary(ms0a)$coef,3); summary(ms0a)$sigma; summary(ms0a)$adj.r.squared
scr_anhac=scale(res[,6,'ANHAC']); scr_cfs=scale(res[,1,'CFS'])
plot(scale(res[,6,'ANHAC']),scale(res[,1,'CFS'])); abline(coef(ms0a)[1:2])
for (i in cfsgen[cfsgen%in%dimnames(res)[[1]]])
points(scr_anhac[i,1],scr_cfs[i,1],pch=19)
rescfs=resid(ms0a)[cfsok==1]; resanhac3=resid(ms0a)[cfsok==0]
```

```
jF=var(resid(ms0a)[cfsok==1])/var(resid(ms0a)[cfsok==0])
jt=table(cfsok); jF; jt; 1-pf(jF,jt[2]-1,jt[1]-1) # F=4.02, 1/42df, p=0.0515
# not quoted, but consistent with the overall concept that departures from the
shared
```

# signature of dysbiosis in unrelated diseases may reflect genera that contribute

# causally to individual disorders

```
resid(ms0a)[abs(resid(ms0a))>1]
```

# Dialister is only one of 7 genera that do not conform to the shared signature of disease

| #           | Barnesiella    | Dialister             | Escherichia |
|-------------|----------------|-----------------------|-------------|
| Oxalobacter |                |                       |             |
| #           | -1.660710      | -2.201975             | 1.016102    |
| 1.180069    |                |                       |             |
| #           | Parasutterella | Phascolarctobacterium | Prevotella  |
| #           | -1.642325      | 2.786318              | 2.864754    |

# code to generate figures of decision trees in supplementary pdf

```
library(partykit)
bdat=read.csv(paste0(mydir,'Dove_Atlas data 130324.csv')); bdat=bdat[,-1]
b1=bdat[bdat$dgn%in%c(4,6),]
pdf(paste0(mydir,'decision tree examples 040424.pdf'))
for (i in c(18,21)) {
set.seed(i)
b1x=sample(b1$id[b1$dgn==6],21)
b1x=b1[!b1$id%in%b1x,]; cx=ctree_control(alpha=.2, testtype='MonteCarlo')
b1x$fdgn=as.factor(as.numeric(b1x$dgn==6))
c1=ctree(fdgn~Dialister+Roseburia+Unknown.Bacteria, data=b1x, control=cx)
plot(c1)}
dev.off(3); dev.off(2); dev.list()
```

#####  
#=#END OF R CODE TO ANALYSE DATA =====#  
#=#FROM SUPPLEMENTARY TABLE S3B OF GACESA 2022=====#

```
#=====#
#=====#
#=====#
#=====#
#=====#
#=====#
#=====#
#####
```
