# Supplementary material for: An approach to finding specific forms of dysbiosis that associate with different disorders
Source: bioRxiv or medRxiv preprint supplement (doi:10.1101/2024.04.23.24306162), 2024-04-24

1  
Dialister  
p = 0.014

$\leq 0$

$> 0$

3  
Roseburia  
p = 0.099

$\leq 1.52$

$> 1.52$

Node 2 (n = 13)

Node 4 (n = 14)

Node 5 (n = 7)

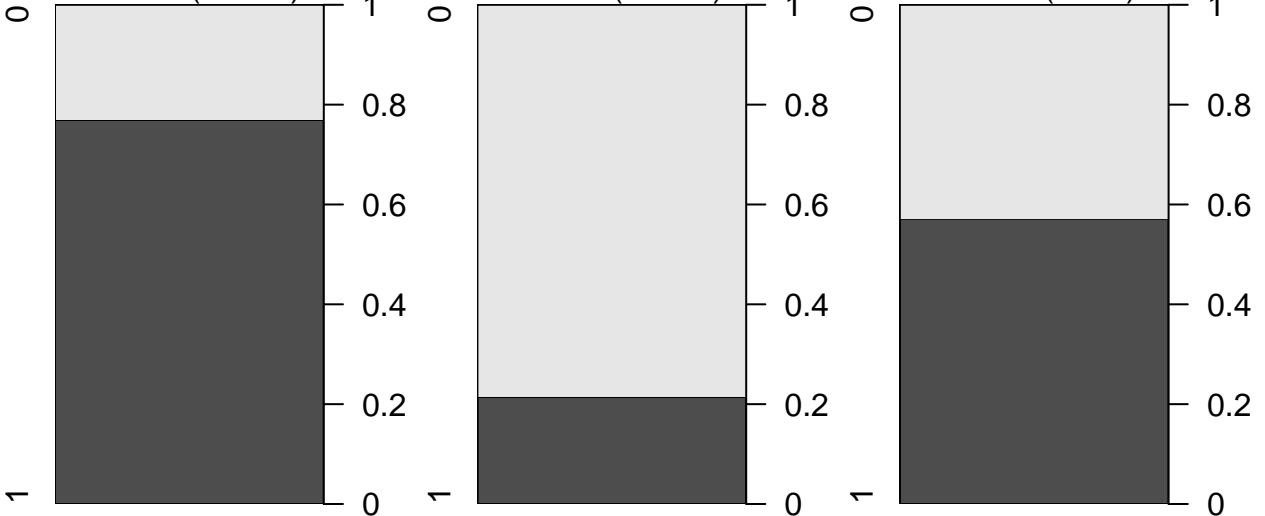

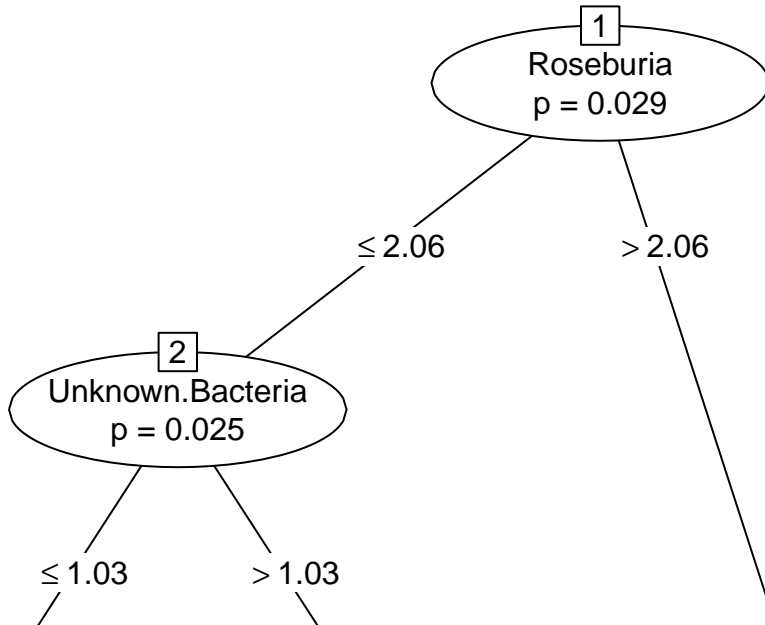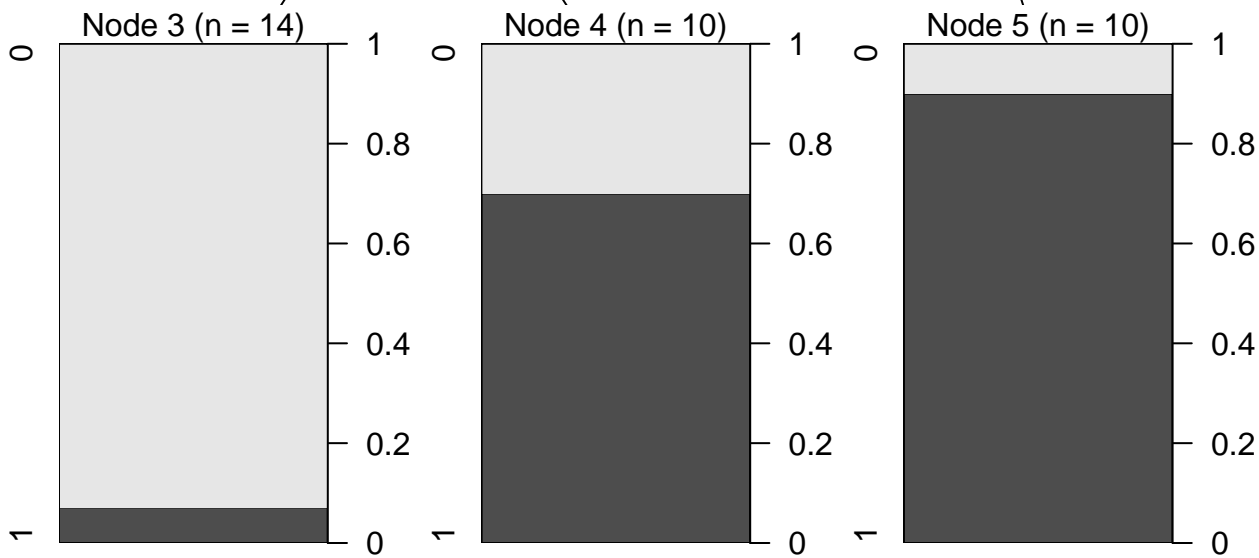

Supplement: Supplementary file [file media-6.pdf]
